# Supplementary material for: Preparation of spiro[imidazolidine-4,3′-indolin]-2′-imines via copper(i)-catalyzed formal [2 + 2 + 1] cycloaddition of 3-diazoindolin-2-imines and triazines
Source: Royal Society of Chemistry journal article supplement (doi:10.1039/c9ob01767d), 2019-01-01

## Supporting Information for

### Preparation of Spiro[imidazolidine-4,3'-indolin]-2'-imines via Copper(I)-Catalyzed Formal [2+2+1] Cycloaddition of 3-Diazoindolin-2-imines and Triazines

Yuxuan Zhou, Fanghui Ma, Ping Lu\*, Yanguang Wang\*

Department of Chemistry, Zhejiang University, Hangzhou 310027, P. R. China

## Content

|                                                          |         |
|----------------------------------------------------------|---------|
| General Information.....                                 | S2      |
| General Procedure for the Synthesis of <b>1</b> .....    | S3      |
| General Procedure for the Synthesis of <b>2</b> .....    | S4      |
| General Procedure for the Synthesis of <b>3</b> .....    | S5      |
| The ORTEP and Crystal Parameters of <b>3a</b> .....      | S6      |
| Characterization Data for Products.....                  | S7-S19  |
| Copies of NMR Spectra.....                               | S20-S47 |
| NMR Spectra for Compounds <b>3C</b> and <b>3D</b> .....  | S48     |
| HRMS Spectra for Compounds <b>3C</b> and <b>3D</b> ..... | S49     |

## General Information

$^1\text{H}$  NMR spectra were obtained on 400, or 600 MHz in  $\text{CDCl}_3$  or DMSO. The chemical shifts were quoted in parts per million (ppm) referenced to 0.0 ppm for tetramethylsilane as an internal standard.  $^{13}\text{C}$  NMR spectra were recorded on 100, or 150 MHz in  $\text{CDCl}_3$  or DMSO. The chemical shifts were reported in ppm referenced to the internal solvent signals (77.0 ppm for  $\text{CDCl}_3$  or 42.0 ppm for DMSO). The following abbreviations were used to describe peak patterns where appropriate: b = broad, s = singlet, d = doublet, t = triplet, q = quartet, m = multiplet.  $^{13}\text{C}\{^1\text{H}\}$  for proton-decoupled carbon data was recorded. Coupling constants J were reported in hertz unit (Hz). Infrared spectra were obtained on an FTIR spectrometer. High-resolution mass spectra (HRMS) data were obtained by using ESI ionization. Melting points were measured with SGW X-4 micro melting point apparatus. Flash column chromatography was performed employing 300-400 mesh silica gel. Thin layer chromatography (TLC) was performed on silica gel HSGF254.

DCE, DCM and MeCN were dried by distillation over  $\text{CaH}_2$ . THF and toluene was distilled from Na.  $\text{Rh}_2(\text{Oct})_4$ ,  $\text{Cu}(\text{OTf})_2$ ,  $\text{Cu}(\text{OTf})\cdot 1/2\text{C}_6\text{H}_6$ ,  $\text{Cu}(\text{OAc})_2$ ,  $\text{CuCl}$ ,  $\text{Cu}(\text{CN})_4\text{PF}_6$ ,  $\text{AgOTf}$  were used as received from the commercial sources. Triazine, 3-diazoindolin-2-imines and its analogues were prepared according to the published methods.<sup>1-3</sup>

## References

- 1 (a) Kawaguchi, A. W.; Sudo, A.; Endo, T. *J. Poly. Sci. PART A: Poly. Chem.* **2012**, *50*, 1457. (b) Bujnowski, K.; Adamczyk-W, A.; Synoradzki, L. *ARKIVOC* **2008**, *13*, 106.
2. Xing, Y. P.; Sheng, G. R.; Wang, J.; Lu, P.; Wang, Y. G. *Org. Lett.* **2014**, *16*, 1244.
3. Sheng, G. R.; Huang, K.; Chi, Z. H.; Ding, H. L.; Xing, Y. P.; Lu, P.; Wang, Y. G. *Org. Lett.* **2014**, *16*, 5096

## General Procedure for the Synthesis of **1**

3-Diazoindolin-2-imines **1a-1c** and **1e-n** were prepared from indole derivatives and sulfonyl azides according to our published procedure (Scheme S1).<sup>1</sup>

3-Diazoindolin-2-imine **1d** was prepared from N-benzyl-2-ethynylaniline and tosyl azide through our published method (Scheme S2).<sup>2</sup> The prepared 3-diazoindolin-2-imines were compared with the measured spectroscopic and physical data, and confirmed their identity.

### Scheme S1. Preparation of Compounds **1a-1c** and **1e-n**

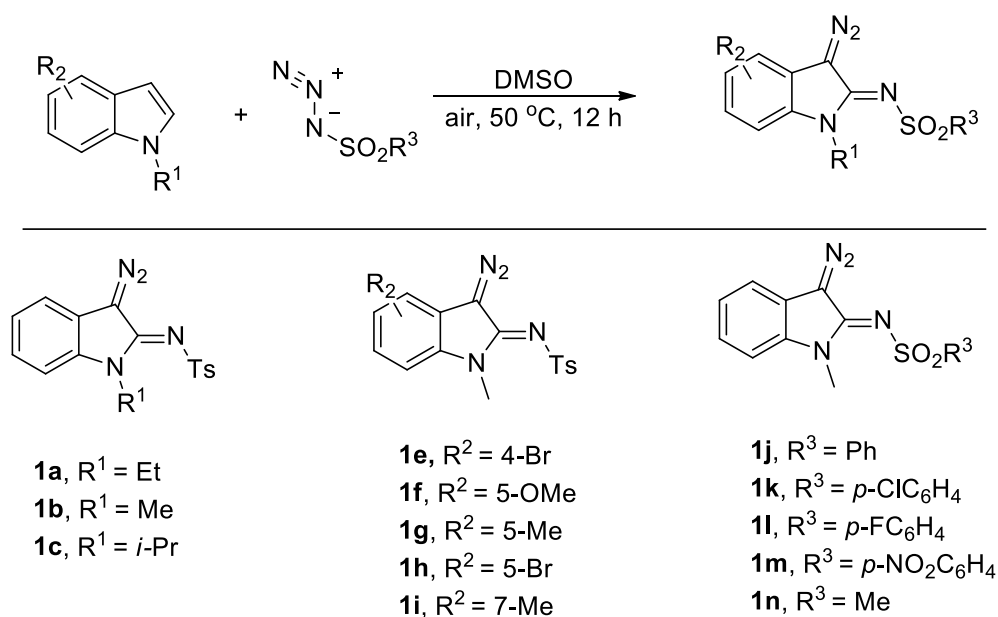

### Scheme S2. Preparation of Compound **1d**

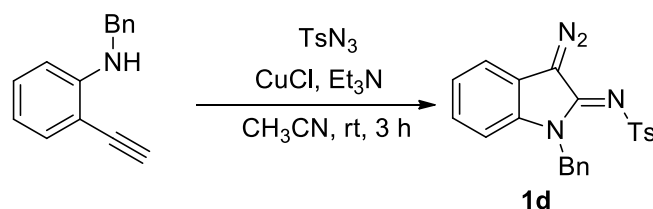

## References

- Sheng, G. R.; Huang, K.; Chi, Z. H.; Ding, H. L.; Xing, Y. P.; Lu, P.; Wang, Y. G. *Org. Lett.* **2014**, *16*, 5096.
- Xing, Y. P.; Sheng, G. R.; Wang, J.; Lu, P.; Wang, Y. G. *Org. Lett.* **2014**, *16*, 1244.

## General Procedure for the Synthesis of **2**

Triazines **2a-f** were prepared from aromatic amines and paraformaldehyde according to the literature.<sup>1</sup> The prepared 3-diazoindolin-2-imines were compared with the measured spectroscopic and physical data, and confirmed their identity.

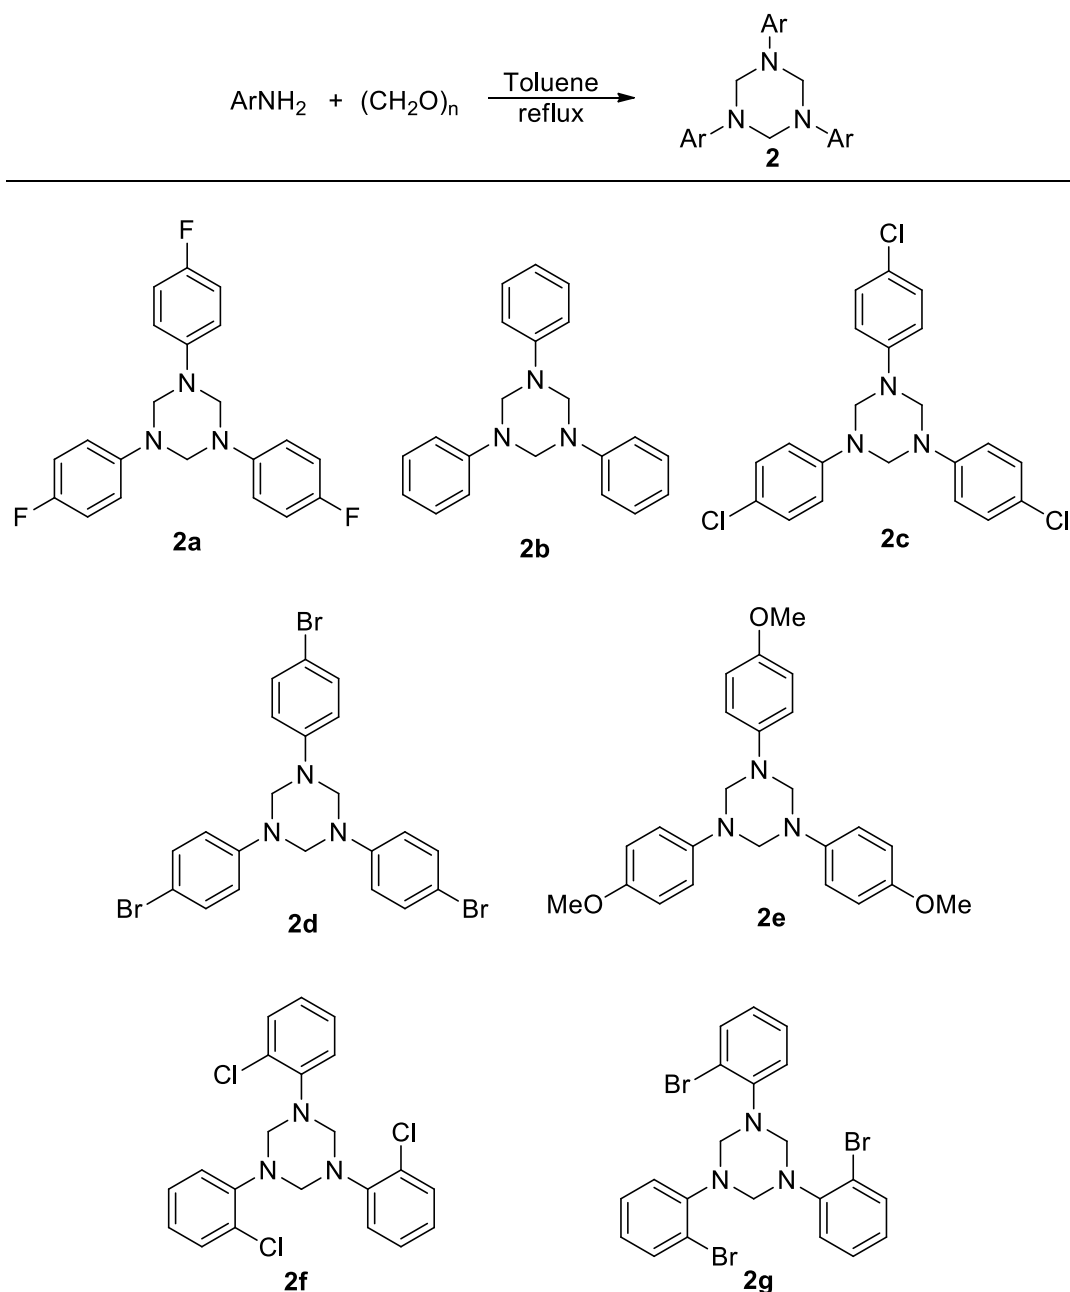

## References

- (a) Kawaguchi, A. W.; Sudo, A.; Endo, T. *J. Poly. Sci. PART A: Poly. Chem.* **2012**, *50*, 1457. (b) Bujnowski, K.; Adamczyk-W, A.; Synoradzki, L. *ARKIVOC* **2008**, *13*, 106.

## General Procedure for the Synthesis of **3**

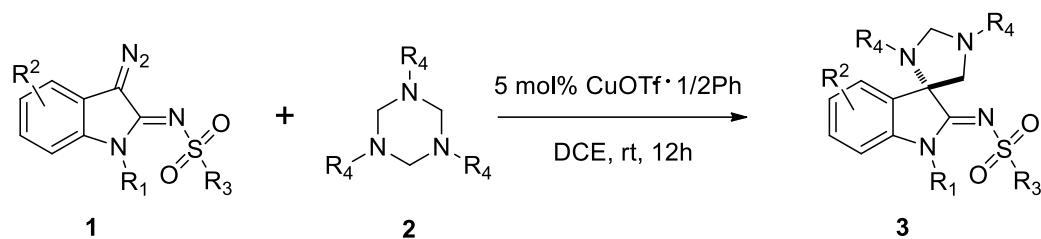

To an over-dried flask equipped with a magnetic stirrer were added sequentially **1** (0.3 mmol), **2** (0.2 mmol), Cu(OTf)·1/2C<sub>6</sub>H<sub>6</sub> (0.01 mmol) and dry DCE (2 mL) under air atmosphere. The reaction mixture was stirred at room temperature for 12 h. Upon completion, the solvent was evaporated in vacuum. The residue was purified by column chromatography on silica gel (petroleum ether/ ethyl acetate = 5:1~3:1, v/v) to give product **3**.

**The ORTEP and Crystal Parameters of 3a** wherein thermal ellipsoids are drawn at 30% probability level

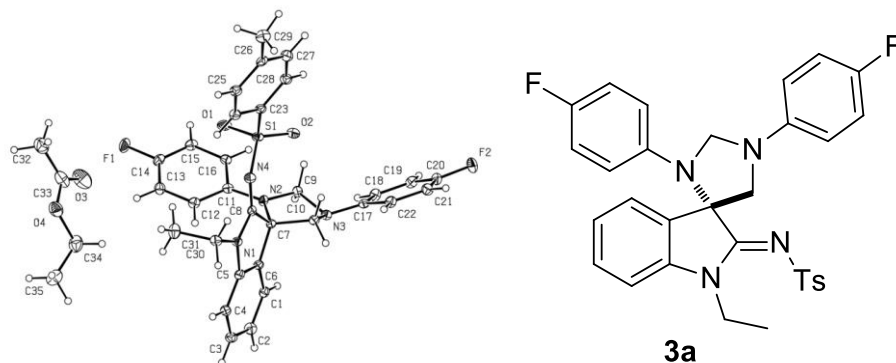

|                                                               |                                 |                              |              |
|---------------------------------------------------------------|---------------------------------|------------------------------|--------------|
| Bond precision:                                               | C-C = 0.0071 Å                  | Wavelength=0.71073           |              |
| Cell:                                                         | a=11.8960(7)                    | b=10.6048(5)                 | c=13.5243(8) |
|                                                               | alpha=90                        | beta=109.984(6)              | gamma=90     |
| Temperature:                                                  | 125 K                           |                              |              |
|                                                               | Calculated                      | Reported                     |              |
| Volume                                                        | 1603.42(17)                     | 1603.44(16)                  |              |
| Space group                                                   | P 21                            | P 1 21 1                     |              |
| Hall group                                                    | P 2yb                           | P 2yb                        |              |
| Moiety formula                                                | C31 H28 F2 N4 O2 S, C4 H8 O2    | C31 H28 F2 N4 O2 S, C4 H8 O2 |              |
| Sum formula                                                   | C35 H36 F2 N4 O4 S              | C35 H36 F2 N4 O4 S           |              |
| Mr                                                            | 646.74                          | 646.74                       |              |
| Dx, g cm <sup>-3</sup>                                        | 1.340                           | 1.340                        |              |
| Z                                                             | 2                               | 2                            |              |
| Mu (mm <sup>-1</sup> )                                        | 0.158                           | 0.158                        |              |
| F000                                                          | 680.0                           | 680.0                        |              |
| F000'                                                         | 680.57                          |                              |              |
| h, k, lmax                                                    | 14, 12, 16                      | 14, 12, 16                   |              |
| Nref                                                          | 5874[ 3110]                     | 4376                         |              |
| Tmin, Tmax                                                    | 0.948, 0.961                    | 0.921, 1.000                 |              |
| Tmin'                                                         | 0.934                           |                              |              |
| Correction method= # Reported T Limits: Tmin=0.921 Tmax=1.000 |                                 |                              |              |
| AbsCorr = MULTI-SCAN                                          |                                 |                              |              |
| Data completeness= 1.41/0.74                                  | Theta(max)= 25.350              |                              |              |
| R(reflections)= 0.0518( 3903)                                 | wR2(reflections)= 0.1349( 4376) |                              |              |
| S = 1.038                                                     | Npar= 419                       |                              |              |

The crystals of **3a** of suitable quality were obtained from EA/n-hexane, and was analyzed by single crystal diffractometer (Varian, Gemini A Ultra). Atomic coordinates, bond lengths, bond angles, and thermal parameters for compounds **3a** has been deposited at the Cambridge Crystallographic Data Centre. CCDC deposit number for **3a** is 1820074.

## Characterization Data for Products

### (Z)-N-(1'-Ethyl-1,3-bis(4-fluorophenyl)spiro[imidazolidine-4,3'-indolin]-2'-ylidene)-4-methylbenzenesulfonamide (3a)

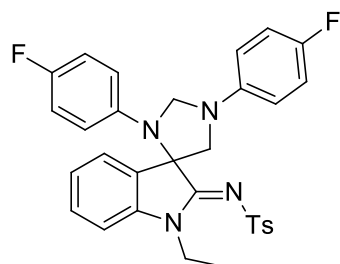

White solid; Yield 63% (70 mg); m.p. 195.0-196.0 °C ; <sup>1</sup>H NMR (400 MHz, CDCl<sub>3</sub>) δ 7.51 (d, *J* = 7.9 Hz, 2H), 7.36 (t, *J* = 7.7, 1.2 Hz, 1H), 7.28 (d, *J* = 7.3 Hz, 1H), 7.08 – 6.97 (m, 6H), 6.73 – 6.61 (m, 4H), 6.00 (dd, *J* = 9.2, 4.0 Hz, 2H), 5.20 (s, 1H), 5.14 (s, 1H), 4.61 (d, *J* = 7.9 Hz, 1H), 4.13 (dq, *J* = 14.2, 7.1 Hz, 1H), 3.91 (dq, *J* = 14.1, 7.0 Hz, 1H), 3.72 (d, *J* = 8.0 Hz, 1H), 2.30 (s, 3H), 1.34 (t, *J* = 7.1 Hz, 3H); <sup>13</sup>C NMR (100 MHz, CDCl<sub>3</sub>) δ 166.9, 156.5 (d, *J*<sub>C-F</sub> = 235.7 Hz), 155.9 (d, *J*<sub>C-F</sub> = 235.1 Hz), 142.5 (d, *J*<sub>C-F</sub> = 1.9 Hz), 142.0, 140.03, 139.99, 139.6 (d, *J*<sub>C-F</sub> = 1.9 Hz), 132.6, 129.6, 128.8, 125.9, 124.6, 123.2, 115.8 (d, *J*<sub>C-F</sub> = 22.3 Hz), 115.7, 115.5 (d, *J*<sub>C-F</sub> = 22.2 Hz), 114.4 (d, *J*<sub>C-F</sub> = 7.5 Hz), 112.8 (d, *J*<sub>C-F</sub> = 7.3 Hz), 109.6, 71.6, 68.9, 60.3, 37.6, 21.3, 11.6; IR(film): 3057, 2979, 2933, 1574, 1515, 1469, 1229, 1151, 1086 cm<sup>-1</sup>; HRMS (ESI-TOF) calcd for C<sub>31</sub>H<sub>28</sub>F<sub>2</sub>N<sub>4</sub>NaO<sub>2</sub>S<sup>+</sup> ([M+Na]<sup>+</sup>): 581.1793; found: 581.1797.

### (Z)-N-(1,3-Bis(4-fluorophenyl)-1'-methylspiro[imidazolidine-4,3'-indolin]-2'-ylidene)-4-methylbenzenesulfonamide (3b)

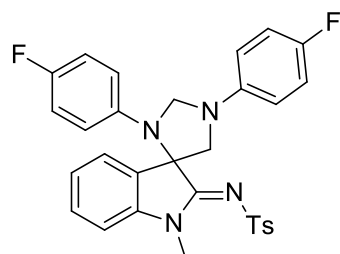

White solid; Yield 55% (60 mg); m.p. 199.0-200.0 °C ; <sup>1</sup>H NMR (600 MHz, DMSO) δ 7.51-7.39 (m, 3H), 7.36 (d, *J* = 7.9 Hz, 1H), 7.23 (d, *J* = 7.5 Hz, 1H), 7.14-7.09 (m, 5H), 6.85-6.81 (m, 4H), 6.10 (dd, *J* = 6.5, 3.3 Hz, 2H), 5.29 (s, 1H), 4.90 (s, 1H), 4.37 (d, *J* = 8.4 Hz, 1H), 3.81 (d, *J* = 8.4 Hz, 1H), 3.47 (s, 3H), 2.29 (s, 3H); <sup>13</sup>C NMR (150 MHz, DMSO) δ 170.1, 158.2 (d, *J*<sub>C-F</sub> = 233.0 Hz), 157.6 (d, *J*<sub>C-F</sub> = 232.0 Hz), 145.4, 144.3, 143.9, 142.9, 142.3, 134.2, 132.2, 131.5, 128.1, 127.0, 124.8, 118.1 (d, *J*<sub>C-F</sub> = 21.9 Hz), 117.8 (d, *J*<sub>C-F</sub> = 22.0 Hz), 117.1 (d, *J*<sub>C-F</sub> = 7.5 Hz), 115.6 (d, *J*<sub>C-F</sub> = 7.5 Hz), 113.3, 73.8, 71.5, 62.3, 32.3, 23.4; IR(film): 3259, 3057, 2925, 1732, 1583, 1511, 1470, 1160, 1086 cm<sup>-1</sup>; HRMS (ESI-TOF) calcd for C<sub>30</sub>H<sub>26</sub>F<sub>2</sub>N<sub>4</sub>NaO<sub>2</sub>S<sup>+</sup> ([M+Na]<sup>+</sup>): 567.1637; found: 567.1639.

**(Z)-N-(1,3-Bis(4-fluorophenyl)-1'-isopropylspiro[imidazolidine-4,3'-indolin]-2'-ylidene)-4-methylbenzenesulfonamide (3c)**

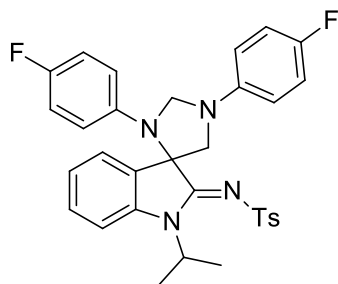

White solid; Yield 46% (53 mg); m.p. 208.0-209.0 °C; <sup>1</sup>H NMR (400 MHz, CDCl<sub>3</sub>) δ 7.53 (d, *J* = 8.4 Hz, 2H), 7.37 – 7.26 (m, 2H), 7.21 (d, *J* = 8.0 Hz, 1H), 7.11 – 6.92 (m, 5H), 6.76 – 6.59 (m, 4H), 6.05 – 5.93 (m, 2H), 5.18 (dd, *J* = 17.1, 2.0 Hz, 2H), 5.00-4.93 (m, 1H), 4.66 (d, *J* = 7.9 Hz, 1H), 3.71 (d, *J* = 7.9 Hz, 1H), 2.31 (s, 3H), 1.55 (dd, *J* = 12.6, 7.0 Hz, 6H); <sup>13</sup>C NMR (100 MHz, CDCl<sub>3</sub>) δ 167.1, 156.5 (d, *J*<sub>C-F</sub> = 235.7 Hz), 155.8 (d, *J*<sub>C-F</sub> = 234.9 Hz), 142.6 (d, *J*<sub>C-F</sub> = 1.8 Hz), 141.9, 140.3, 139.6 (d, *J*<sub>C-F</sub> = 1.8 Hz), 133.1, 129.3, 128.8, 125.9, 124.3, 123.2, 115.8 (d, *J*<sub>C-F</sub> = 22.2 Hz), 115.5 (d, *J*<sub>C-F</sub> = 22.2 Hz), 114.4 (d, *J*<sub>C-F</sub> = 7.5 Hz), 112.7 (d, *J*<sub>C-F</sub> = 7.4 Hz), 111.4, 71.3, 69.0, 60.2, 46.7, 21.3, 19.0, 18.6; IR(film) :3057, 2975,2876,1574,1511,1397,1229,1183,1086 cm<sup>-1</sup>; HRMS (ESI-TOF) calcd for C<sub>32</sub>H<sub>30</sub>F<sub>2</sub>N<sub>4</sub>NaO<sub>2</sub>S<sup>+</sup> ([M+Na]<sup>+</sup>): 595.1950; found: 595.1954.

**(Z)-N-(1'-Benzyl-1,3-bis(4-fluorophenyl)spiro[imidazolidine-4,3'-indolin]-2'-ylidene)-4-methylbenzenesulfonamide (3d)**

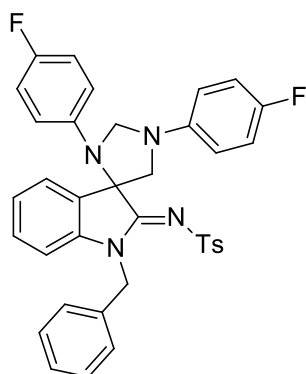

White solid; Yield 54% (67 mg); m.p. 208.0-209.0 °C; <sup>1</sup>H NMR (400 MHz, CDCl<sub>3</sub>) δ 7.44 (d, *J* = 8.0 Hz, 2H), 7.36 – 7.25 (m, 7H), 7.09 – 6.97 (m, 6H), 6.69 – 6.63 (m, 2H), 6.62 – 6.52 (m, 2H), 5.98 – 5.91 (m, 2H), 5.33 (d, *J* = 14.9 Hz, 1H), 5.20 (dd, *J* = 10.6, 1.9 Hz, 2H), 4.87 (d, *J* = 14.9 Hz, 1H), 4.66 (d, *J* = 7.9 Hz, 1H), 3.77 (d, *J* = 8.0 Hz, 1H), 2.31 (s, 3H); <sup>13</sup>C NMR (100 MHz, CDCl<sub>3</sub>) δ 167.2, 156.6 (d, *J*<sub>C-F</sub> = 235.9 Hz), 155.9 (d, *J*<sub>C-F</sub> = 235.0 Hz), 142.5 (d, *J*<sub>C-F</sub> = 1.8 Hz), 142.1, 140.2, 139.7, 139.4 (d, *J*<sub>C-F</sub> = 1.9 Hz), 134.5, 132.5, 129.5, 128.9, 128.8, 128.3, 126.2, 124.7, 123.1, 115.9 (d, *J*<sub>C-F</sub> = 22.3 Hz), 115.5 (d, *J*<sub>C-F</sub> = 22.2 Hz), 114.6 (d, *J*<sub>C-F</sub> = 7.4 Hz), 112.8 (d, *J*<sub>C-F</sub> = 7.3 Hz), 110.3, 71.5, 68.9, 60.5, 46.4, 21.3; IR(film): 3059, 2946, 2834, 1581, 1511, 1395, 1228, 1149, 1087 cm<sup>-1</sup>; HRMS (ESI-TOF) calcd for C<sub>36</sub>H<sub>30</sub>F<sub>2</sub>N<sub>4</sub>NaO<sub>2</sub>S<sup>+</sup> ([M+Na]<sup>+</sup>): 643.1950; found: 643.1934.



**(Z)-N-(4'-Bromo-1,3-bis(4-fluorophenyl)-1'-methylspiro[imidazolidine-4,3'-indolin]-2'-ylidene)-4-methylbenzenesulfonamide (3e)**

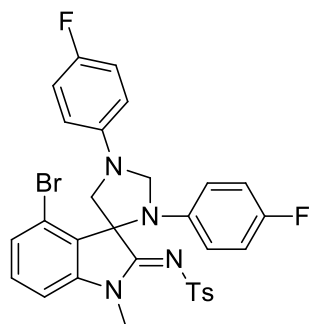

White solid; Yield 69% (86 mg); m.p. 198.0-199.0 °C ;  $^1\text{H NMR}$  (600 MHz,  $\text{CDCl}_3$ )  $\delta$  7.56 (d,  $J = 8.2$  Hz, 2H), 7.27 – 7.19 (m, 2H), 7.06 (d,  $J = 8.0$  Hz, 2H), 7.02 – 6.95 (m, 3H), 6.80 – 6.76 (m, 2H), 6.53 – 6.47 (m, 2H), 6.10 – 6.05 (m, 2H), 5.22 – 5.11 (m, 2H), 4.45 (d,  $J = 8.5$  Hz, 1H), 3.97 (d,  $J = 8.5$  Hz, 1H), 3.51 (s, 3H), 2.32 (s, 3H);  $^{13}\text{C NMR}$  (150 MHz,  $\text{CDCl}_3$ )  $\delta$  168.3, 156.2 (d,  $J_{\text{C-F}} = 235.6$  Hz), 155.9 (d,  $J_{\text{C-F}} = 234.4$  Hz), 143.9, 142.2, 141.3 (d,  $J_{\text{C-F}} = 1.6$  Hz), 140.2, 139.0 (d,  $J_{\text{C-F}} = 1.9$  Hz), 131.2, 129.0, 128.90, 128.87, 126.1, 117.4, 115.83 (d,  $J_{\text{C-F}} = 22.2$  Hz), 115.79 (d,  $J_{\text{C-F}} = 22.2$  Hz), 112.8 (d,  $J_{\text{C-F}} = 7.5$  Hz), 112.6 (d,  $J_{\text{C-F}} = 7.5$  Hz), 108.8, 72.8, 68.8, 58.7, 30.4, 21.4; IR(film): 3054, 2852, 1583, 1514, 1453, 1228, 1151, 1089  $\text{cm}^{-1}$ ; HRMS (ESI-TOF) calcd for  $\text{C}_{30}\text{H}_{25}\text{BrF}_2\text{N}_4\text{NaO}_2\text{S}^+$  ( $[\text{M}+\text{Na}]^+$ ): 645.0742; found: 645.0726.

**(Z)-N-(1,3-Bis(4-fluorophenyl)-5'-methoxy-1'-methylspiro[imidazolidine-4,3'-indolin]-2'-ylidene)-4-methylbenzenesulfonamide (3f)**

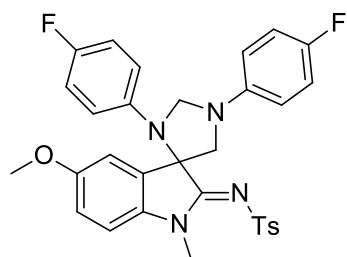

White solid; Yield 78% (90 mg); m.p. 177.0-178.0 °C ;  $^1\text{H NMR}$  (400 MHz,  $\text{CDCl}_3$ )  $\delta$  7.48 (d,  $J = 8.3$  Hz, 2H), 7.04 – 6.92 (m, 5H), 6.87 (dd,  $J = 6.5, 2.5$  Hz, 2H), 6.78 – 6.71 (m, 2H), 6.65 – 6.58 (m, 2H), 6.07-6.02 (m, 2H), 5.12 (dd,  $J = 37.4, 2.1$  Hz, 2H), 4.50 (d,  $J = 8.2$  Hz, 1H), 3.73 (d,  $J = 8.3$  Hz, 1H), 3.69 (s, 3H), 3.50 (s, 3H), 2.30 (s, 3H);  $^{13}\text{C NMR}$  (100 MHz,  $\text{CDCl}_3$ )  $\delta$  167.2, 156.5 (d,  $J_{\text{C-F}} = 235.7$  Hz), 157.6, 156.0 (d,  $J_{\text{C-F}} = 235.3$  Hz), 142.5 (d,  $J_{\text{C-F}} = 1.8$  Hz), 141.9, 140.3, 139.6 (d,  $J_{\text{C-F}} = 1.8$  Hz), 134.6, 133.6, 128.8, 126.0, 115.8 (d,  $J_{\text{C-F}} = 22.2$  Hz), 115.7 (d,  $J_{\text{C-F}} = 22.3$  Hz), 114.4 (d,  $J_{\text{C-F}} = 7.5$  Hz), 114.1, 113.1 (d,  $J_{\text{C-F}} = 7.4$  Hz), 110.3, 109.9, 71.9, 69.0, 60.5, 55.7, 30.2, 21.3; IR(film): 3057, 2938, 2838, 1583, 1511, 1397, 1229, 1148, 1088  $\text{cm}^{-1}$ ; HRMS (ESI-TOF) calcd for  $\text{C}_{31}\text{H}_{28}\text{F}_2\text{N}_4\text{NaO}_3\text{S}^+$  ( $[\text{M}+\text{Na}]^+$ ): 597.1742; found: 597.1753.

**(Z)-N-(1,3-Bis(4-fluorophenyl)-1',5'-dimethylspiro[imidazolidine-4,3'-indolin]-2'-ylidene)-4-methylbenzenesulfonamide (3g)**

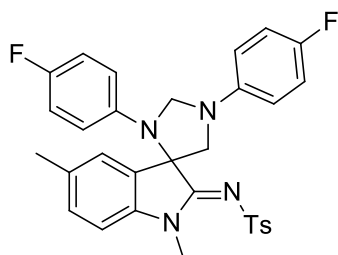

White solid; Yield 63% (70 mg); m.p. 197.0-198.0 °C; <sup>1</sup>H NMR (400 MHz, DMSO) δ 7.44 (d, *J* = 8.4 Hz, 2H), 7.28 – 7.20 (m, 2H), 7.16 – 7.05 (m, 5H), 6.88 – 6.78 (m, 4H), 6.10 (dd, *J* = 9.1, 4.2 Hz, 2H), 5.28 (d, *J* = 3.2 Hz, 1H), 4.89 (d, *J* = 3.1 Hz, 1H), 4.35 (d, *J* = 8.7 Hz, 1H), 3.80 (d, *J* = 8.8 Hz, 1H), 3.45 (s, 3H), 2.28 (s, 3H), 2.20 (s, 3H); <sup>13</sup>C NMR (100 MHz, DMSO) δ 169.9, 158.2 (d, *J*<sub>C-F</sub> = 232.8 Hz), 157.6 (d, *J*<sub>C-F</sub> = 232.0 Hz), 145.5, 144.2, 143.0, 142.3, 141.6, 136.5, 134.4, 132.5, 131.5, 128.0, 125.2, 118.2, 118.0, 117.7, 117.1 (d, *J*<sub>C-F</sub> = 7.3 Hz), 115.5 (d, *J*<sub>C-F</sub> = 7.4 Hz), 113.2, 73.8, 71.5, 62.4, 32.4, 23.3, 23.1; IR(film): 3261, 2924, 2847, 1582, 1511, 1335, 1228, 1161, 1086 cm<sup>-1</sup>; HRMS (ESI-TOF) calcd for C<sub>31</sub>H<sub>28</sub>F<sub>2</sub>N<sub>4</sub>NaO<sub>2</sub>S<sup>+</sup> ([M+Na]<sup>+</sup>): 581.1793; found: 581.1803.

**(Z)-N-(5'-Bromo-1,3-bis(4-fluorophenyl)-1'-methylspiro[imidazolidine-4,3'-indolin]-2'-ylidene)-4-methylbenzenesulfonamide (3h)**

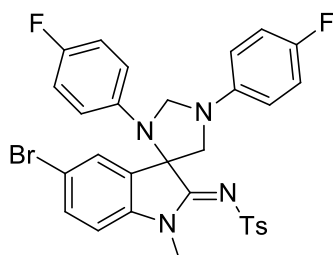

White solid; Yield 36% (45 mg); m.p. 184.0-185.0 °C; <sup>1</sup>H NMR (400 MHz, DMSO) δ 7.63 (dd, *J* = 8.4, 2.0 Hz, 1H), 7.51 – 7.39 (m, 3H), 7.34 (d, *J* = 8.4 Hz, 1H), 7.13 (t, *J* = 8.0 Hz, 4H), 6.93 – 6.77 (m, 4H), 6.10 (dd, *J* = 8.6, 4.0 Hz, 2H), 5.34 (d, *J* = 3.1 Hz, 1H), 4.87 (d, *J* = 3.0 Hz, 1H), 4.35 (d, *J* = 8.9 Hz, 1H), 3.87 (d, *J* = 8.9 Hz, 1H), 3.43 (s, 3H), 2.28 (s, 3H); <sup>13</sup>C NMR (100 MHz, DMSO) δ 169.6, 158.3 (d, *J*<sub>C-F</sub> = 233.0 Hz), 157.7 (d, *J*<sub>C-F</sub> = 233.5 Hz), 145.4, 144.5, 143.2, 142.7, 142.1, 136.6, 135.0, 131.5, 128.1, 127.4, 119.0, 118.1 (d, *J*<sub>C-F</sub> = 22.1 Hz), 118.0 (d, *J*<sub>C-F</sub> = 22.3 Hz), 117.3 (d, *J*<sub>C-F</sub> = 7.4 Hz), 115.6 (d, *J*<sub>C-F</sub> = 7.3 Hz), 115.4, 73.6, 71.4, 62.2, 32.3, 23.4; IR(film): 3048, 2929, 2875, 1584, 1512, 1287, 1224, 1143, 1080 cm<sup>-1</sup>; HRMS (ESI-TOF) calcd for C<sub>30</sub>H<sub>25</sub>BrF<sub>2</sub>N<sub>4</sub>NaO<sub>2</sub>S<sup>+</sup> ([M+Na]<sup>+</sup>): 645.0742; found: 645.0751.

**(Z)-N-(1,3-bis(4-Fluorophenyl)-1',7'-dimethylspiro[imidazolidine-4,3'-indolin]-2'-ylidene)-4-methylbenzenesulfonamide (3i)**

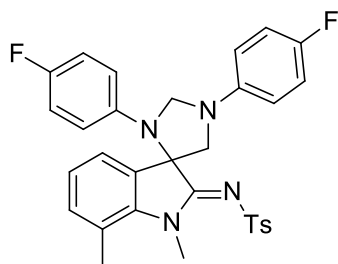

White solid; Yield 82% (92 mg); m.p. 191.0-192.0 °C ; <sup>1</sup>H NMR (600 MHz, CDCl<sub>3</sub>) δ 7.52 (d, *J* = 8.0 Hz, 2H), 7.10 (t, *J* = 7.9 Hz, 2H), 7.03 (d, *J* = 8.0 Hz, 2H), 7.00 – 6.97 (m, 2H), 6.94 (t, *J* = 7.5 Hz, 1H), 6.76 – 6.73 (m, 2H), 6.62 – 6.60 (m, 2H), 6.06 – 6.00 (m, 2H), 5.16 (dd, *J* = 32.7, 2.1 Hz, 2H), 4.55 (d, *J* = 7.9 Hz, 1H), 3.74 (s, 3H), 3.67 (d, *J* = 8.0 Hz, 1H), 2.65 (s, 3H), 2.31 (s, 3H); <sup>13</sup>C NMR (150 MHz, CDCl<sub>3</sub>) δ 168.7, 156.5 (d, *J*<sub>C-F</sub> = 235.6 Hz), 155.9 (d, *J*<sub>C-F</sub> = 235.5 Hz), 142.5 (d, *J*<sub>C-F</sub> = 2.1 Hz), 142.0, 140.3, 139.7 (d, *J*<sub>C-F</sub> = 1.8 Hz), 138.9, 133.6, 133.3, 128.8, 126.0, 124.7, 121.3, 120.9, 115.8 (d, *J*<sub>C-F</sub> = 22.6 Hz), 115.7 (d, *J*<sub>C-F</sub> = 22.9 Hz), 114.3 (d, *J*<sub>C-F</sub> = 7.5 Hz), 112.9 (d, *J*<sub>C-F</sub> = 7.4 Hz), 71.1, 69.0, 60.6, 33.4, 21.3, 19.5; IR(film): 3056, 2869, 1581, 1511, 1397, 1229, 1150, 1091 cm<sup>-1</sup>; HRMS (ESI-TOF) calcd for C<sub>31</sub>H<sub>28</sub>F<sub>2</sub>N<sub>4</sub>NaO<sub>2</sub>S<sup>+</sup> ([M+Na]<sup>+</sup>): 581.1793; found: 581.1792.

**(Z)-N-(1,3-Bis(4-fluorophenyl)-1'-methylspiro[imidazolidine-4,3'-indolin]-2'-ylidene)benzene sulfonamide (3j)**

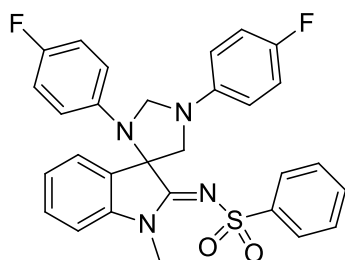

White solid; Yield 89% (94 mg); m.p. 207.0-208.0 °C ; <sup>1</sup>H NMR (400 MHz, DMSO) δ 7.62 (d, *J* = 7.2 Hz, 2H), 7.51 – 7.33 (m, 5H), 7.24 (d, *J* = 7.6 Hz, 1H), 7.17 – 7.07 (m, 3H), 6.89 – 6.80 (m, 4H), 6.14 (dd, *J* = 9.2, 4.2 Hz, 2H), 5.31 (d, *J* = 3.3 Hz, 1H), 4.93 (d, *J* = 3.2 Hz, 1H), 4.38 (d, *J* = 8.8 Hz, 1H), 3.82 (d, *J* = 8.9 Hz, 1H), 3.48 (s, 3H); <sup>13</sup>C NMR (100 MHz, DMSO) δ 170.3, 158.2 (d, *J*<sub>C-F</sub> = 232.9 Hz), 157.6 (d, *J*<sub>C-F</sub> = 232.2 Hz), 145.7, 145.4, 143.8, 142.3, 134.20, 134.17, 132.2, 131.1, 128.0, 127.1, 124.9, 118.2, 118.0, 117.8, 117.1 (d, *J*<sub>C-F</sub> = 7.4 Hz), 115.6 (d, *J*<sub>C-F</sub> = 7.4 Hz), 113.4, 73.8, 71.5, 62.3, 32.3; IR(film):3055,2929,2864,1586,1511,1397,1226,1151,1088 cm<sup>-1</sup>; HRMS (ESI-TOF) calcd for C<sub>29</sub>H<sub>24</sub>F<sub>2</sub>N<sub>4</sub>NaO<sub>2</sub>S<sup>+</sup> ([M+Na]<sup>+</sup>): 643.1950; found: 643.1934.

**(Z)-N-(1,3-Bis(4-fluorophenyl)-1'-methylspiro[imidazolidine-4,3'-indolin]-2'-ylidene)-4-chlorobenzenesulfonamide (3k)**

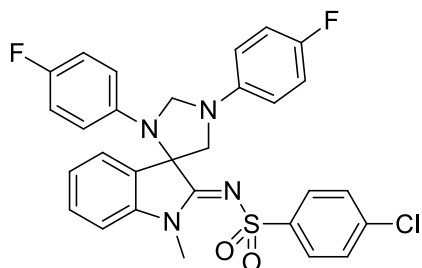

White solid; Yield 61% (69 mg); m.p. 206.0-207.0 °C; <sup>1</sup>H NMR (600 MHz, DMSO) δ 7.58 (d, *J* = 8.6 Hz, 2H), 7.44 – 7.33 (m, 4H), 7.20 (d, *J* = 5.2 Hz, 1H), 7.13 – 7.07 (m, 3H), 6.82 – 6.77 (m, 4H), 6.04 (dd, *J* = 9.2, 4.1 Hz, 2H), 5.27 (d, *J* = 3.2 Hz, 1H), 4.87 (d, *J* = 3.1 Hz, 1H), 4.37 (d, *J* = 8.7 Hz, 1H), 3.78 (d, *J* = 8.7 Hz, 1H), 3.48 (s, 3H); <sup>13</sup>C NMR (150 MHz, DMSO) δ 170.8, 158.2 (d, *J*<sub>C-F</sub> = 232.8 Hz), 157.6 (d, *J*<sub>C-F</sub> = 232.5 Hz), 145.4, 144.5, 143.7, 142.3, 138.9, 134.3, 132.2, 131.2, 129.9, 127.3, 124.8, 118.1 (d, *J*<sub>C-F</sub> = 22.0 Hz), 117.8 (d, *J*<sub>C-F</sub> = 22.0 Hz), 117.1 (d, *J*<sub>C-F</sub> = 7.5 Hz), 115.7 (d, *J*<sub>C-F</sub> = 7.4 Hz), 113.6, 73.9, 71.5, 62.3, 32.4; IR(film): 3045, 2856, 1584, 1511, 1470, 1394, 1228, 1151, 1086 cm<sup>-1</sup>; HRMS (ESI-TOF) calcd for C<sub>29</sub>H<sub>23</sub>ClF<sub>2</sub>N<sub>4</sub>NaO<sub>2</sub>S<sup>+</sup> ([M+Na]<sup>+</sup>): 587.1091; found: 587.1091.

**(Z)-N-(1,3-Bis(4-fluorophenyl)-1'-methylspiro[imidazolidine-4,3'-indolin]-2'-ylidene)-4-fluorobenzenesulfonamide (3l)**

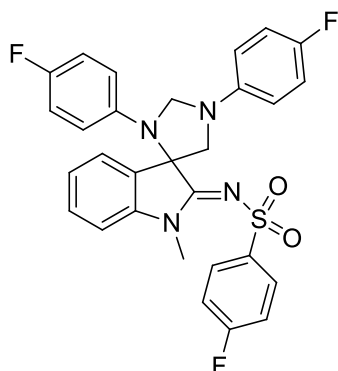

White solid; Yield 63% (69 mg); m.p. 193.0-194.0 °C; <sup>1</sup>H NMR (400 MHz, DMSO) δ 7.66 (dd, *J* = 8.7, 5.3 Hz, 2H), 7.47 – 7.35 (m, 2H), 7.23-7.08 (m, 6H), 6.90 – 6.75 (m, 4H), 6.09 (dd, *J* = 9.0, 3.8 Hz, 2H), 5.30 (d, *J* = 3.3 Hz, 1H), 4.90 (d, *J* = 3.2 Hz, 1H), 4.38 (d, *J* = 8.8 Hz, 1H), 3.80 (d, *J* = 8.8 Hz, 1H), 3.49 (s, 3H); <sup>13</sup>C NMR (100 MHz, DMSO) δ 170.6, 166.0 (d, *J*<sub>C-F</sub> = 248.2 Hz), 158.2 (d, *J*<sub>C-F</sub> = 232.7 Hz), 157.6 (d, *J*<sub>C-F</sub> = 232.7 Hz), 145.4 (d, *J*<sub>C-F</sub> = 1.0 Hz), 143.8, 142.3 (d, *J*<sub>C-F</sub> = 0.9 Hz), 142.1 (d, *J*<sub>C-F</sub> = 2.9 Hz), 134.2, 132.2, 131.0 (d, *J*<sub>C-F</sub> = 9.3 Hz), 127.2, 124.8, 118.10 (d, *J*<sub>C-F</sub> = 22.2 Hz), 118.08 (d, *J*<sub>C-F</sub> = 21.5 Hz), 117.8 (d, *J*<sub>C-F</sub> = 22.1 Hz), 117.1 (d, *J*<sub>C-F</sub> = 7.3 Hz), 115.6 (d, *J*<sub>C-F</sub> = 7.3 Hz), 113.5, 73.9, 71.5, 62.3, 32.3; IR(film): 3062, 2925, 2856, 1580, 1510, 1392, 1228, 1149, 1085 cm<sup>-1</sup>; HRMS (ESI-TOF) calcd for C<sub>29</sub>H<sub>23</sub>F<sub>3</sub>N<sub>4</sub>NaO<sub>2</sub>S<sup>+</sup> ([M+Na]<sup>+</sup>): 571.1386; found: 571.1407.

**(Z)-N-(1,3-Bis(4-fluorophenyl)-1'-methylspiro[imidazolidine-4,3'-indolin]-2'-ylidene)-4-nitrobenzenesulfonamide (3m)**

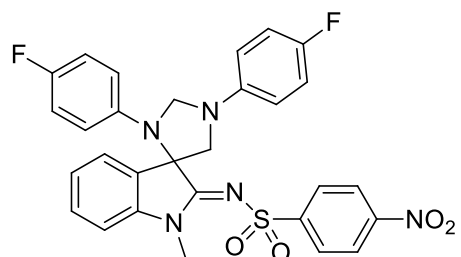

White solid; Yield 45% (52 mg); m.p. 210.0-211.0 °C; <sup>1</sup>H NMR (400 MHz, CDCl<sub>3</sub>) δ 8.11 (d, *J* = 8.8 Hz, 2H), 7.81 (d, *J* = 8.8 Hz, 2H), 7.43 (t, *J* = 8 Hz, 1H), 7.32 (d, *J* = 7.6 Hz, 1H), 7.18 – 7.09 (m, 2H), 7.06 – 6.97 (m, 2H), 6.83 – 6.73 (m, 2H), 6.68 – 6.58 (m, 2H), 6.12 – 5.98 (m, 2H), 5.20 (d, *J* = 2.3 Hz, 1H), 5.07 (d, *J* = 2.2 Hz, 1H), 4.50 (d, *J* = 8.2 Hz, 1H), 3.75 (d, *J* = 8.2 Hz, 1H), 3.56 (s, 3H); <sup>13</sup>C NMR (100 MHz, CDCl<sub>3</sub>) δ 169.1, 156.7 (d, *J*<sub>C-F</sub> = 236.5 Hz), 156.1 (d, *J*<sub>C-F</sub> = 236.7 Hz), 149.2, 148.5, 142.3, 140.9, 139.5, 132.0, 130.0, 127.4, 125.5, 123.6, 123.2, 116.0 (d, *J*<sub>C-F</sub> = 22.2 Hz), 115.9 (d, *J*<sub>C-F</sub> = 22.5 Hz), 114.4 (d, *J*<sub>C-F</sub> = 7.5 Hz), 113.1 (d, *J*<sub>C-F</sub> = 7.5 Hz), 110.1, 72.1, 69.1, 60.3, 30.3; IR(film): 3105, 3054, 2867, 1567, 1510, 1349, 1229, 1152, 1087 cm<sup>-1</sup>; HRMS (ESI-TOF) calcd for C<sub>29</sub>H<sub>23</sub>F<sub>2</sub>N<sub>5</sub>NaO<sub>2</sub>S<sup>+</sup> ([M+Na]<sup>+</sup>): 598.1331; found: 598.1346.

**(Z)-N-(1,3-Bis(4-fluorophenyl)-1'-methylspiro[imidazolidine-4,3'-indolin]-2'-ylidene)methanesulfonamide (3n)**

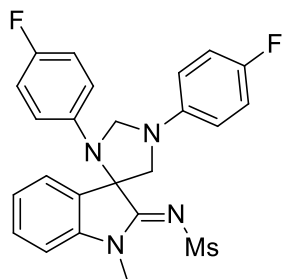

White solid; Yield 65% (61 mg); m.p. 145.0-146.0 °C; <sup>1</sup>H NMR (400 MHz, CDCl<sub>3</sub>) δ 7.39 (t, *J* = 7.6 Hz, 1H), 7.30 (d, *J* = 7.6 Hz, 1H), 7.13 – 7.03 (m, 2H), 7.02 – 6.94 (m, 2H), 6.86 – 6.77 (m, 2H), 6.67 – 6.55 (m, 2H), 6.15 – 6.05 (m, 2H), 5.20 (d, *J* = 2.2 Hz, 1H), 5.09 (d, *J* = 2.1 Hz, 1H), 4.48 (d, *J* = 8.1 Hz, 1H), 3.69 (d, *J* = 8.1 Hz, 1H), 3.50 (s, 3H), 2.80 (s, 3H); <sup>13</sup>C NMR (100 MHz, CDCl<sub>3</sub>) δ 168.3, 156.5 (d, *J*<sub>C-F</sub> = 235.9 Hz), 155.9 (d, *J*<sub>C-F</sub> = 235.6 Hz), 142.6, 142.5, 141.2, 139.58, 139.56, 132.1, 129.7, 124.8, 122.9, 116.2, 115.83 (d, *J*<sub>C-F</sub> = 22.2 Hz), 115.80 (d, *J*<sub>C-F</sub> = 22.1 Hz), 114.3 (d, *J*<sub>C-F</sub> = 7.6 Hz), 112.9 (d, *J*<sub>C-F</sub> = 7.2 Hz), 109.7, 71.7, 69.0, 60.3, 43.3, 29.6; IR(film): 3057, 2935, 2875, 1588, 1511, 1396, 1229, 1128, 1098 cm<sup>-1</sup>; HRMS (ESI-TOF) calcd for C<sub>24</sub>H<sub>22</sub>F<sub>2</sub>N<sub>4</sub>NaO<sub>2</sub>S<sup>+</sup> ([M+Na]<sup>+</sup>): 491.1324; found: 491.1330.

**(Z)-N-(1'-Methyl-1,3-diphenylspiro[imidazolidine-4,3'-indolin]-2'-ylidene)benzenesulfonamide (3o)**

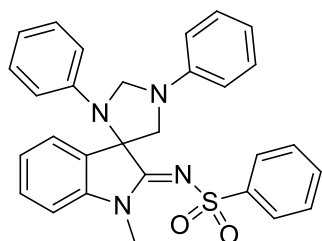

White solid; Yield 81% (80 mg); m.p. 138.0-139.0 °C; <sup>1</sup>H NMR (600 MHz, CDCl<sub>3</sub>) δ 7.58 (d, *J* = 8.4 Hz, 2H), 7.41 – 7.27 (m, 5H), 7.22 (t, *J* = 7.8 Hz, 2H), 7.11 – 7.04 (m, 4H), 6.86 (t, *J* = 7.4 Hz, 1H), 6.72 – 6.68 (m, 3H), 6.15 (d, *J* = 8.0 Hz, 2H), 5.29 (s, 1H), 5.16 (s, 1H), 4.52 (d, *J* = 8.3 Hz, 1H), 3.82 (d, *J* = 8.3 Hz, 1H), 3.56 (s, 3H); <sup>13</sup>C NMR (150 MHz, CDCl<sub>3</sub>) δ 168.0, 145.9, 143.2, 142.9, 141.3, 132.5, 131.4, 129.6, 129.4, 129.2, 128.2, 126.2, 124.9, 123.1, 118.7, 118.1, 113.4, 112.2, 109.6, 71.5, 68.2, 60.0, 30.2; IR(film): 3062, 2912, 2843, 1597, 1573, 1502, 1301, 1150, 1086 cm<sup>-1</sup>; HRMS (ESI-TOF) calcd for C<sub>29</sub>H<sub>26</sub>N<sub>4</sub>NaO<sub>2</sub>S<sup>+</sup> ([M+Na]<sup>+</sup>): 517.1669; found: 517.1675.

**(Z)-N-(1,3-Bis(4-chlorophenyl)-1'-methylspiro[imidazolidine-4,3'-indolin]-2'-ylidene)benzenesulfonamide (3p)**

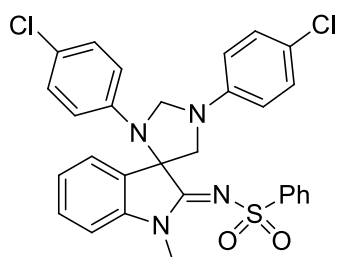

White solid; Yield 81% (91 mg); m.p. 210.0-211.0 °C; <sup>1</sup>H NMR (600 MHz, DMSO) δ 7.61 (d, *J* = 7.8 Hz, 2H), 7.49 (t, *J* = 7.4 Hz, 1H), 7.44 (t, *J* = 7.7 Hz, 1H), 7.38 – 7.36 (m, 3H), 7.30 (d, *J* = 8.4 Hz, 2H), 7.24 (d, *J* = 7.4 Hz, 1H), 7.11 (t, *J* = 7.4 Hz, 1H), 7.03 (d, *J* = 8.5 Hz, 2H), 6.83 (d, *J* = 8.5 Hz, 2H), 6.15 (d, *J* = 8.6 Hz, 2H), 5.32 (d, *J* = 3.5 Hz, 1H), 4.94 (d, *J* = 3.4 Hz, 1H), 4.39 (d, *J* = 8.9 Hz, 1H), 3.85 (d, *J* = 9.0 Hz, 1H), 3.47 (s, 3H); <sup>13</sup>C NMR (150 MHz, DMSO) δ 170.0, 147.3, 145.6, 144.3, 143.8, 134.2, 134.0, 132.4, 131.3, 131.1, 128.1, 127.2, 124.8, 124.5, 123.9, 117.5, 116.3, 113.5, 73.5, 70.9, 61.8, 32.3; IR(film): 3052, 2924, 2881, 1589, 1495, 1345, 1303, 1151, 1087 cm<sup>-1</sup>; HRMS (ESI-TOF) calcd for C<sub>29</sub>H<sub>24</sub>Cl<sub>2</sub>N<sub>4</sub>NaO<sub>2</sub>S<sup>+</sup> ([M+Na]<sup>+</sup>): 585.0889; found: 585.0899.

**(Z)-N-(1,3-Bis(4-bromophenyl)-1'-methylspiro[imidazolidine-4,3'-indolin]-2'-ylidene)benzenesulfonamide (3q)**

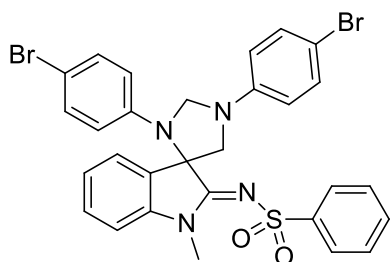

White solid; Yield 72% (94 mg); m.p. 226.0-227.0 °C; <sup>1</sup>H NMR (600 MHz, DMSO) δ 7.61 (d, *J* = 7.8 Hz, 2H), 7.49 (t, *J* = 7.4 Hz, 1H), 7.47 – 7.32 (m, 6H), 7.24 (d, *J* = 7.4 Hz, 1H), 7.16 - 7.10 (m, 3H), 6.77 (d, *J* = 7.8 Hz, 2H), 6.11 (d, *J* = 8.4 Hz, 2H), 5.31 (s, 1H), 4.92 (s, 1H), 4.38 (d, *J* = 8.8 Hz, 1H), 3.84 (d, *J* = 9.4 Hz, 1H), 3.46 (s, 3H); <sup>13</sup>C NMR (150 MHz, DMSO) δ 170.0, 147.6, 145.6, 144.7, 143.8, 134.3, 134.2, 134.0, 133.9, 132.4, 131.2, 128.1, 127.2, 124.8, 118.0, 116.9, 113.5, 112.0, 111.5, 73.5, 70.8, 61.7, 32.3; IR(film): 3069, 2926, 2834, 1589, 1493, 1346, 1303, 1150, 1086 cm<sup>-1</sup>; HRMS (ESI-TOF) calcd for C<sub>29</sub>H<sub>24</sub>Br<sub>2</sub>N<sub>4</sub>NaO<sub>2</sub>S<sup>+</sup> ([M+Na]<sup>+</sup>): 672.9879; found: 672.9864.

**(Z)-N-(1,3-Bis(4-methoxyphenyl)-1'-methylspiro[imidazolidine-4,3'-indolin]-2'-ylidene)benzenesulfonamide (3r)**

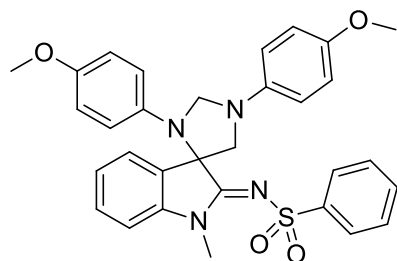

White solid; Yield 41% (45 mg); m.p. 153.0-154.0 °C; <sup>1</sup>H NMR (600 MHz, CDCl<sub>3</sub>) δ 7.62 (d, *J* = 7.8 Hz, 2H), 7.43 – 7.28 (m, 3H), 7.26 – 7.21 (m, 2H), 7.11 – 7.03 (m, 2H), 6.88 (d, *J* = 7.2 Hz, 2H), 6.67 – 6.62 (m, 4H), 6.09 (d, *J* = 6.8 Hz, 2H), 5.18 (s, 1H), 5.07 (s, 1H), 4.46 (d, *J* = 7.8 Hz, 1H), 3.78 (s, 3H), 3.73 (d, *J* = 8.4 Hz, 1H), 3.67 (s, 3H), 3.55 (s, 3H); <sup>13</sup>C NMR (150 MHz, CDCl<sub>3</sub>) δ 168.4, 152.8, 152.2, 143.1, 141.4, 140.6, 137.7, 132.6, 131.3, 129.5, 128.2, 126.2, 124.8, 123.4, 114.9, 114.8, 114.6, 113.4, 109.5, 72.0, 69.2, 60.7, 55.8, 55.5, 30.3; IR(film): 3058, 2946, 2833, 1588, 1511, 1287, 1243, 1150, 1086 cm<sup>-1</sup>; HRMS (ESI-TOF) calcd for C<sub>31</sub>H<sub>30</sub>N<sub>4</sub>NaO<sub>4</sub>S<sup>+</sup> ([M+Na]<sup>+</sup>): 577.1880; found: 577.1891.

**(Z)-N-(1,3-bis(2-Chlorophenyl)-1'-methylspiro[imidazolidine-4,3'-indolin]-2'-ylidene)benzenesulfonamide (3s)**

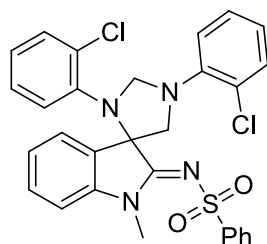

White solid; Yield 53% (60 mg); m.p. 149.9-155.8 °C; <sup>1</sup>H NMR (400 MHz, CDCl<sub>3</sub>) δ 7.78 – 7.73 (m, 2H), 7.42 – 7.37 (m, 1H), 7.36 – 7.34 (m, 2H), 7.30 – 7.23 (m, 2H), 7.19 (dd, *J* = 7.8, 1.6 Hz, 1H), 7.17 – 7.13 (m, 2H), 7.02 – 6.96 (m, 3H), 6.63 (td, *J* = 7.8, 1.6 Hz, 1H), 6.60 – 6.51 (m, 2H), 5.79 (s, 1H), 5.48 (dd, *J* = 8.1, 1.4 Hz, 1H), 4.49 (dd, *J* = 12.2, 7.5 Hz, 1H), 4.35 – 4.26 (m, 2H), 3.27 (s, 3H); <sup>13</sup>C NMR (100 MHz, CDCl<sub>3</sub>) δ 170.4, 142.6, 142.5, 142.1, 140.8, 131.5, 130.0, 129.7, 129.3, 129.0, 128.3, 127.8, 127.2, 126.1, 124.7, 123.4, 121.2, 119.2, 119.0, 118.1, 112.4, 112.4, 110.0, 69.1, 51.7, 29.3; IR(film): 3063, 2927, 1595, 1516, 1469, 1289, 1149, 1085 cm<sup>-1</sup>; HRMS (ESI-TOF) calcd for C<sub>29</sub>H<sub>24</sub>Cl<sub>2</sub>N<sub>4</sub>NaO<sub>2</sub>S<sup>+</sup> ([M+Na]<sup>+</sup>): 585.0889; found: 585.0886.

**(Z)-N-(1,3-bis(2-Bromophenyl)-1'-methylspiro[imidazolidine-4,3'-indolin]-2'-ylidene)benzenesulfonamide (3t)**

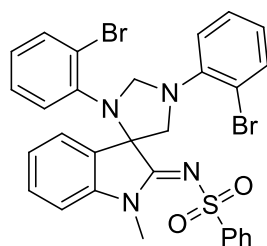

White solid; Yield 62% (80 mg); m.p. 73.4-74.5 °C; <sup>1</sup>H NMR (400 MHz, CDCl<sub>3</sub>) δ 7.75 (dd, *J* = 7.7, 1.6 Hz, 2H), 7.43 – 7.29 (m, 5H), 7.29 – 7.22 (m, 2H), 7.14 (t, *J* = 7.5 Hz, 1H), 7.07 – 6.98 (m, 2H), 6.95 (dd, *J* = 8.3, 1.4 Hz, 1H), 6.67 (td, *J* = 7.8, 1.5 Hz, 1H), 6.54 – 6.44 (m, 2H), 5.77 (s, 1H), 5.46 (dd, *J* = 8.2, 1.3 Hz, 1H), 4.45 (dd, *J* = 12.5, 8.2 Hz, 1H), 4.38 (dd, *J* = 8.3, 5.3 Hz, 1H), 4.27 (dd, *J* = 12.5, 5.3 Hz, 1H), 3.30 (s, 3H); <sup>13</sup>C NMR (100 MHz, CDCl<sub>3</sub>) δ 170.3, 143.4, 142.5, 142.1, 141.7, 132.6, 132.3, 131.5, 130.0, 129.5, 128.5, 128.2, 127.9, 126.1, 124.7, 123.4, 119.6, 118.6, 112.5, 112.4, 111.8, 110.1, 109.6, 69.1, 51.7, 29.4; IR(film): 3058, 2925, 1591, 1515, 1465, 1287, 1148, 1085 cm<sup>-1</sup>; HRMS (ESI-TOF) calcd for C<sub>29</sub>H<sub>24</sub>Br<sub>2</sub>N<sub>4</sub>NaO<sub>2</sub>S<sup>+</sup> ([M+Na]<sup>+</sup>): 672.9879; found: 672.9874.

**(Z)-N-(1,3-Bis(4-bromophenyl)-1'-methylspiro[imidazolidine-4,3'-indolin]-2'-ylidene)-4-methylbenzenesulfonamide (3u)**

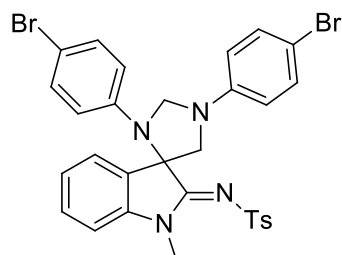

White solid; Yield 45% (60 mg); m.p. 224.0-225.0 °C; <sup>1</sup>H NMR (400 MHz, CDCl<sub>3</sub>) δ 7.49 (d, *J* = 8.4 Hz, 2H), 7.43 – 7.33 (m, 3H), 7.26 – 7.23 (m, 1H), 7.16 – 7.00 (m, 6H), 6.56 (d, *J* = 8.8 Hz, 2H), 5.97 (d, *J* = 8.8 Hz, 2H), 5.19 (d, *J* = 2.3 Hz, 1H), 5.11 (d, *J* = 2.3 Hz, 1H), 4.55 (d, *J* = 8.3 Hz, 1H), 3.76 (d, *J* = 8.3 Hz, 1H), 3.51 (s, 3H), 2.34 (s, 3H); <sup>13</sup>C NMR (100 MHz, CDCl<sub>3</sub>) δ 167.3, 144.7, 142.3, 142.0, 141.2, 139.8, 132.1, 131.9, 131.8, 129.9, 128.9, 126.1, 125.0, 122.9, 115.0, 113.8, 111.0, 110.4, 109.7, 71.4, 68.2, 59.9, 29.9, 21.5; IR(film): 3050, 2923, 2865, 1592, 1495, 1344, 1283, 1162, 1085 cm<sup>-1</sup>; HRMS (ESI-TOF) calcd for C<sub>30</sub>H<sub>26</sub>Br<sub>2</sub>N<sub>4</sub>NaO<sub>2</sub>S<sup>+</sup> ([M+Na]<sup>+</sup>): 687.0035; found: 687.0009.

**(Z)-N-(1,3-Bis(4-bromophenyl)-1',5'-dimethylspiro[imidazolidine-4,3'-indolin]-2'-ylidene)-4-methylbenzenesulfonamide (3v)**

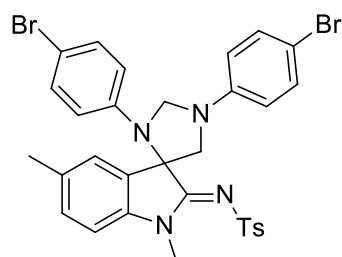



White solid; Yield 63% (85 mg); m.p. 216.0-217.0 °C; <sup>1</sup>H NMR (400 MHz, CDCl<sub>3</sub>) δ 7.47 (d, *J* = 8.0 Hz, 2H), 7.37 (d, *J* = 8.8 Hz, 2H), 7.17 (d, *J* = 8.0 Hz, 1H), 7.10 (d, *J* = 8.8 Hz, 2H), 7.06 – 7.00 (m, 3H), 6.92 (d, *J* = 8.0 Hz, 1H), 6.56 (d, *J* = 8.8 Hz, 2H), 5.96 (d, *J* = 8.9 Hz, 2H), 5.18 (d, *J* = 2.4 Hz, 1H), 5.10 (d, *J* = 2.3 Hz, 1H), 4.53 (d, *J* = 8.2 Hz, 1H), 3.74 (d, *J* = 8.3 Hz, 1H), 3.49 (s, 3H), 2.33 (s, 3H), 2.25 (s, 3H); <sup>13</sup>C NMR (100 MHz, CDCl<sub>3</sub>) δ 167.2, 144.7, 142.2, 142.0, 139.9, 138.8, 135.0, 132.0, 131.9, 131.8, 130.2, 128.9, 126.0, 123.5, 115.0, 113.7, 110.9, 110.3, 109.5, 71.3, 68.2, 59.9, 30.0, 21.4, 21.1; IR(film): 2920, 2847, 1589, 1494, 1392, 1338, 1283, 1148, 1086 cm<sup>-1</sup>; HRMS (ESI-TOF) calcd for C<sub>31</sub>H<sub>28</sub>Br<sub>2</sub>N<sub>4</sub>NaO<sub>2</sub>S<sup>+</sup> ([M+Na]<sup>+</sup>): 701.0192; found: 701.0172.

**(Z)-N-(1,3-Bis(4-bromophenyl)-5'-methoxy-1'-methylspiro[imidazolidine-4,3'-indolin]-2'-ylidene)-4-methylbenzenesulfonamide (3w)**

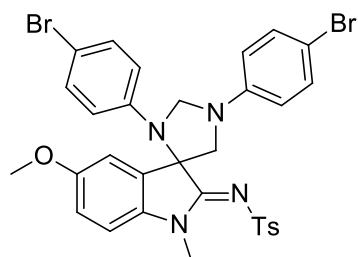

White solid; Yield 67% (93 mg); m.p. 221.0-222.0 °C; <sup>1</sup>H NMR (400 MHz, CDCl<sub>3</sub>) δ 7.50 – 7.43 (m, 2H), 7.41 – 7.33 (m, 2H), 7.14 – 7.08 (m, 2H), 7.03 (d, *J* = 8.0 Hz, 2H), 6.96 (d, *J* = 8.6 Hz, 1H), 6.88 (dd, *J* = 8.6, 2.5 Hz, 1H), 6.81 (d, *J* = 2.5 Hz, 1H), 6.57 – 6.54 (m, 2H), 5.98 – 5.96 (m, 2H), 5.17 (d, *J* = 2.4 Hz, 1H), 5.08 (d, *J* = 2.4 Hz, 1H), 4.52 (d, *J* = 8.4 Hz, 1H), 3.76 (d, *J* = 8.4 Hz, 1H), 3.70 (s, 3H), 3.50 (s, 3H), 2.34 (s, 3H); <sup>13</sup>C NMR (100 MHz, CDCl<sub>3</sub>) δ 166.9, 157.7, 144.8, 142.1, 142.0, 140.0, 134.5, 133.3, 132.1, 131.9, 128.9, 126.0, 115.0, 114.2, 113.8, 111.0, 110.45, 110.36, 109.7, 71.5, 68.2, 60.0, 55.8, 30.2, 21.4; IR(film): 3045, 2929, 2837, 1589, 1494, 1337, 1285, 1148, 1087 cm<sup>-1</sup>; HRMS (ESI-TOF) calcd for C<sub>31</sub>H<sub>28</sub>Br<sub>2</sub>N<sub>4</sub>NaO<sub>3</sub>S<sup>+</sup> ([M+Na]<sup>+</sup>): 717.0141; found: 717.0123.

**(Z)-N-(5'-Methoxy-1'-methyl-1,3-diphenylspiro[imidazolidine-4,3'-indolin]-2'-ylidene)-4-methylbenzenesulfonamide (3x)**

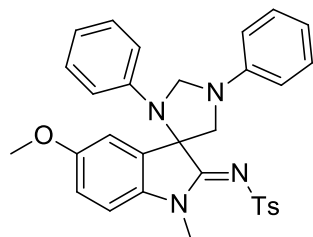

White solid; Yield 70% (75 mg); m.p. 134.0-135.0 °C; <sup>1</sup>H NMR (600 MHz, CDCl<sub>3</sub>) δ 7.42 (d, *J* = 8.0 Hz, 2H), 7.29 (t, *J* = 7.8 Hz, 2H), 7.06 (t, *J* = 7.7 Hz, 2H), 6.99 – 6.95 (m, 3H), 6.90 – 6.81 (m, 3H), 6.70 (d, *J* = 7.6 Hz, 3H), 6.16 (d, *J* = 8.0 Hz, 2H), 5.26 (s, 1H), 5.12 (s, 1H), 4.49 (d, *J* = 8.3 Hz, 1H), 3.81 (d, *J* = 8.4 Hz, 1H), 3.69 (s, 3H), 3.53 (s, 3H), 2.29 (s, 3H); <sup>13</sup>C NMR (150 MHz, CDCl<sub>3</sub>) δ 167.3, 157.7, 146.0, 143.3, 141.7, 140.3, 134.7, 134.0, 129.3, 129.2, 128.8, 126.1, 118.7, 118.0, 114.3, 113.5, 112.3, 110.2, 109.7, 71.7, 68.2, 60.1, 55.8, 30.5, 21.4; IR(film): 3041, 2834, 1598, 1502, 1393, 1332, 1285, 1147, 1087 cm<sup>-1</sup>; HRMS (ESI-TOF) calcd for C<sub>31</sub>H<sub>30</sub>N<sub>4</sub>NaO<sub>3</sub>S<sup>+</sup> ([M+Na]<sup>+</sup>): 561.1931; found: 561.1925.

**(Z)-N-(1,3-Bis(4-bromophenyl)-1'-methylspiro[imidazolidine-4,3'-indolin]-2'-ylidene)-4-chlorobenzenesulfonamide (3y)**

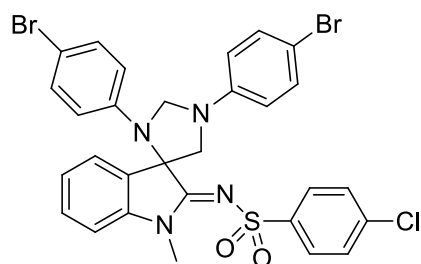

White solid; Yield 68% (93 mg); m.p. 169.0-170.0 °C; <sup>1</sup>H NMR (400 MHz, CDCl<sub>3</sub>) δ 7.58 – 7.48 (m, 2H), 7.44 – 7.33 (m, 3H), 7.28 – 7.24 (m, 1H), 7.24 – 7.19 (m, 2H), 7.18 – 7.02 (m, 4H), 6.55 (d, *J* = 8.9 Hz, 2H), 5.97 (d, *J* = 9.0 Hz, 2H), 5.18 (d, *J* = 2.5 Hz, 1H), 5.07 (d, *J* = 2.4 Hz, 1H), 4.50 (d, *J* = 8.4 Hz, 1H), 3.76 (d, *J* = 8.4 Hz, 1H), 3.51 (s, 3H); <sup>13</sup>C NMR (100 MHz, CDCl<sub>3</sub>) δ 167.8, 144.6, 142.0, 141.3, 141.0, 138.0, 132.1, 132.0, 131.7, 130.0, 128.5, 127.5, 125.2, 122.9, 114.9, 113.8, 111.1, 110.6, 109.9, 71.5, 68.2, 59.8, 30.0; IR(film): 3067, 2925, 2854, 1609, 1585, 1490, 1286, 1165, 1086 cm<sup>-1</sup>; HRMS (ESI-TOF) calcd for C<sub>29</sub>H<sub>23</sub>Br<sub>2</sub>ClN<sub>4</sub>NaO<sub>2</sub>S<sup>+</sup> ([M+Na]<sup>+</sup>): 706.9489; found: 706.9476.

**(Z)-N-(1,3-Bis(4-bromophenyl)-1'-methylspiro[imidazolidine-4,3'-indolin]-2'-ylidene)-4-fluorobenzenesulfonamide (3z)**

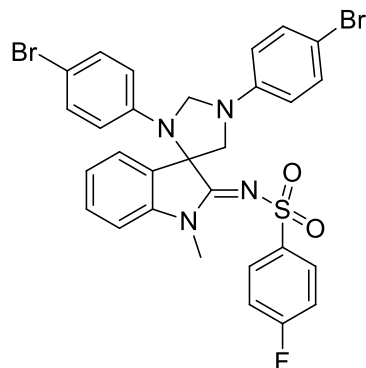

White solid; Yield 53% (71 mg); m.p. 203.0-204.0 °C; <sup>1</sup>H NMR (600 MHz, DMSO) δ 7.70 – 7.62 (m, 2H), 7.48 – 7.36 (m, 4H), 7.22 (d, *J* = 7.8 Hz, 1H), 7.19 – 7.04 (m, 5H), 6.78 (d, *J* = 8.9 Hz, 2H), 6.07 (d, *J* = 8.9 Hz, 2H), 5.30 (d, *J* = 3.5 Hz, 1H), 4.91 (d, *J* = 3.4 Hz, 1H), 4.38 (d, *J* = 8.9 Hz, 1H), 3.83 (d, *J* = 9.0 Hz, 1H), 3.48 (s, 3H); <sup>13</sup>C NMR (150 MHz, DMSO) δ 170.2, 166.1 (d, *J*<sub>C-F</sub> = 248.9 Hz), 147.6, 144.6, 143.7, 142.0 (d, *J*<sub>C-F</sub> = 2.9 Hz), 134.1, 134.0, 133.9, 132.3, 131.0 (d, *J*<sub>C-F</sub> = 9.3 Hz), 127.3, 124.7, 118.2, 118.0, 117.9, 116.8, 113.5, 111.8 (d, *J*<sub>C-F</sub> = 77.0 Hz), 104.0, 73.5, 70.8, 61.8, 32.3; IR(film): 3362, 3261, 2924, 1587, 1493, 1400, 1340, 1148, 1086 cm<sup>-1</sup>; HRMS (ESI-TOF) calcd for C<sub>29</sub>H<sub>23</sub>Br<sub>2</sub>FN<sub>4</sub>NaO<sub>2</sub>S<sup>+</sup> ([M+Na]<sup>+</sup>): 690.9785; found: 690.9776.

**(Z)-N-(1,3-Bis(4-bromophenyl)-1'-methylspiro[imidazolidine-4,3'-indolin]-2'-ylidene)methanesulfonamide (3A)**

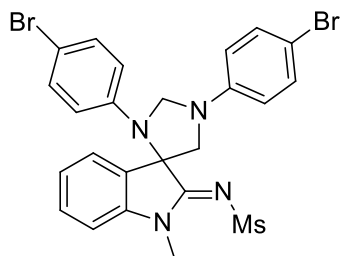

White solid; Yield 73% (86 mg); m.p. 202.0-203.0 °C; <sup>1</sup>H NMR (400 MHz, CDCl<sub>3</sub>) δ 7.43 – 7.33 (m, 3H), 7.24 (d, *J* = 6.8 Hz, 1H), 7.22 – 7.15 (m, 2H), 7.12 – 7.03 (m, 2H), 6.54 (d, *J* = 8.9 Hz, 2H), 6.04 (d, *J* = 8.9 Hz, 2H), 5.19 (d, *J* = 2.4 Hz, 1H), 5.09 (d, *J* = 2.4 Hz, 1H), 4.48 (d, *J* = 8.2 Hz, 1H), 3.71 (d, *J* = 8.3 Hz, 1H), 3.50 (s, 3H), 2.83 (s, 3H); <sup>13</sup>C NMR (100 MHz, CDCl<sub>3</sub>) δ 168.0, 144.7, 142.0, 141.1, 132.04, 132.02, 131.7, 129.9, 124.9, 122.7, 114.9, 113.8, 111.0, 110.5, 109.7, 71.4, 68.2, 59.6, 43.4, 29.6; IR(film): 3044, 2934, 2845, 1590, 1495, 1337, 1295, 1128, 1098 cm<sup>-1</sup>; HRMS (ESI-TOF) calcd for C<sub>24</sub>H<sub>22</sub>Br<sub>2</sub>FN<sub>4</sub>NaO<sub>2</sub>S<sup>+</sup> ([M+Na]<sup>+</sup>): 610.9722; found: 610.9726.

**(Z)-N-(1,3-Bis(4-bromophenyl)-1'-ethylspiro[imidazolidine-4,3'-indolin]-2'-ylidene)-4-methylbenzenesulfonamide (3B)**

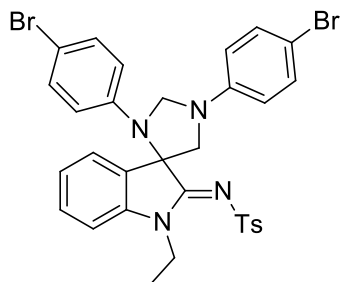

White solid; Yield 45% (75 mg); m.p. 221.0-222.0 °C; <sup>1</sup>H NMR (400 MHz, CDCl<sub>3</sub>) δ 7.48 (d, *J* = 8.4 Hz, 2H), 7.42 – 7.33 (m, 3H), 7.23 (d, *J* = 7.2 Hz, 1H), 7.10 – 6.98 (m, 6H), 6.57 (d, *J* = 8.9 Hz, 2H), 5.93 (d, *J* = 9.0 Hz, 2H), 5.19 (d, *J* = 2.4 Hz, 1H), 5.13 (d, *J* = 2.4 Hz, 1H), 4.61 (d, *J* = 8.1 Hz, 1H), 4.19 – 4.10 (m, 1H), 3.95- 3.86 (m, 1H), 3.75 (d, *J* = 8.2 Hz, 1H), 2.33 (s, 3H), 1.34 (t, *J* = 7.1 Hz, 3H); <sup>13</sup>C NMR (100 MHz, CDCl<sub>3</sub>) δ 166.5, 144.7, 142.2, 142.0, 139.9, 139.7, 132.3, 132.1, 131.7, 129.8, 128.9, 125.9, 124.8, 123.0, 115.0, 113.6, 111.0, 110.2, 109.7, 71.2, 68.2, 59.9, 37.6, 21.4, 11.6; IR(film): 2976, 2925, 2873, 1582, 1494, 1394, 1342, 1151, 1085 cm<sup>-1</sup>; HRMS (ESI-TOF) calcd for C<sub>31</sub>H<sub>28</sub>Br<sub>2</sub>N<sub>4</sub>NaO<sub>2</sub>S<sup>+</sup> ([M+Na]<sup>+</sup>): 701.0192; found: 701.0163.

# Copies of NMR Spectra

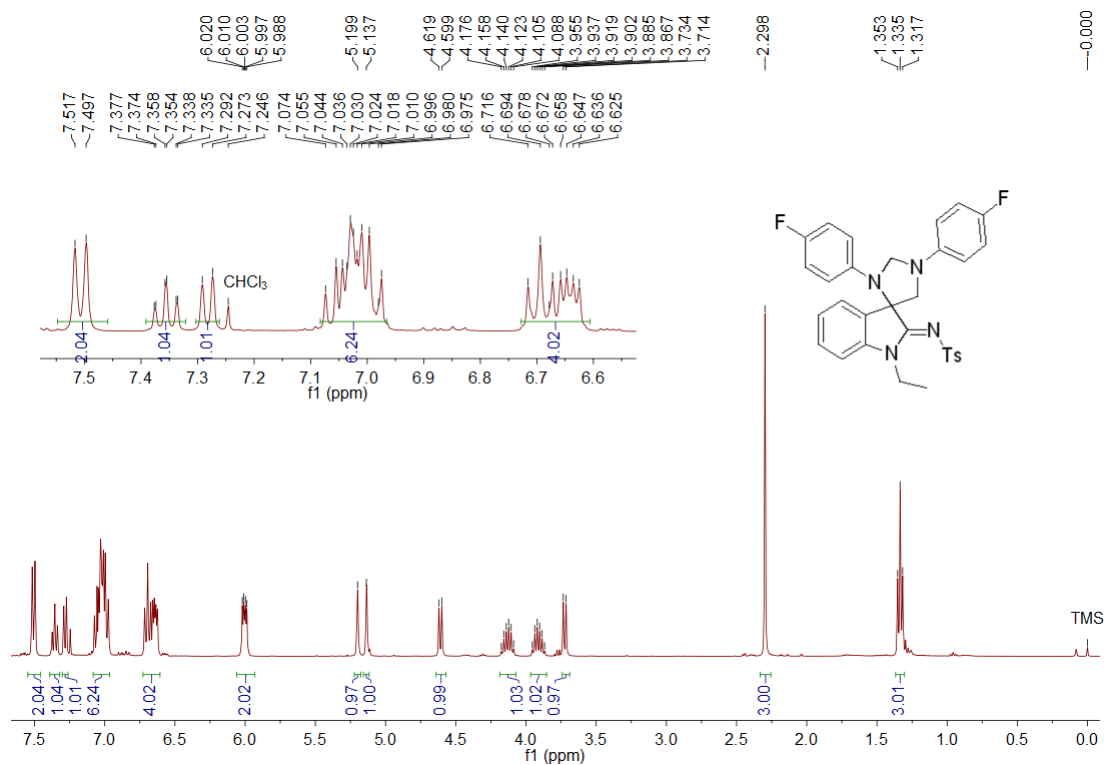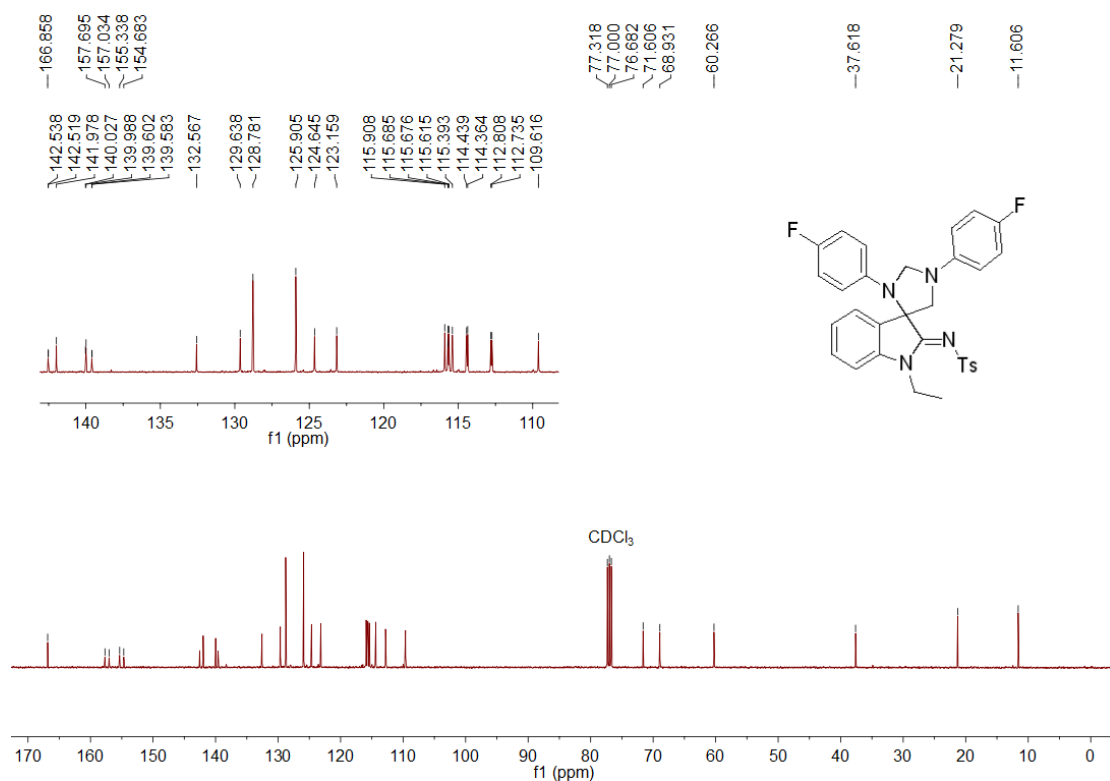

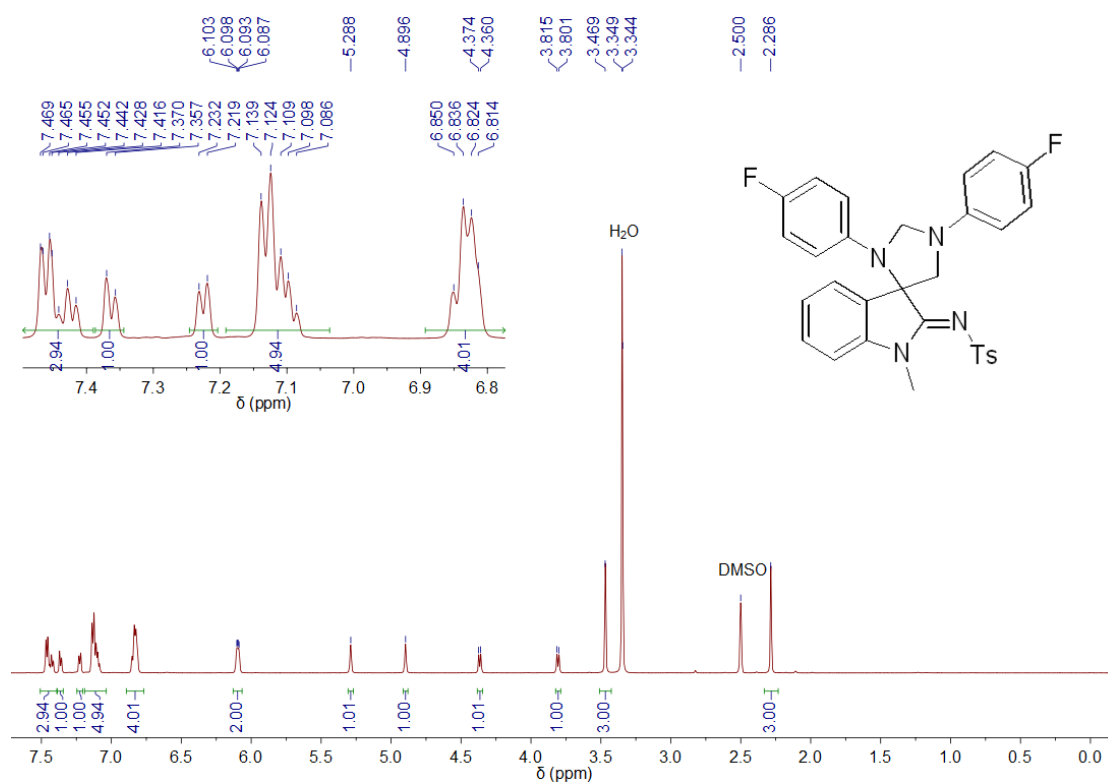

**<sup>1</sup>H NMR of Compound 3b**

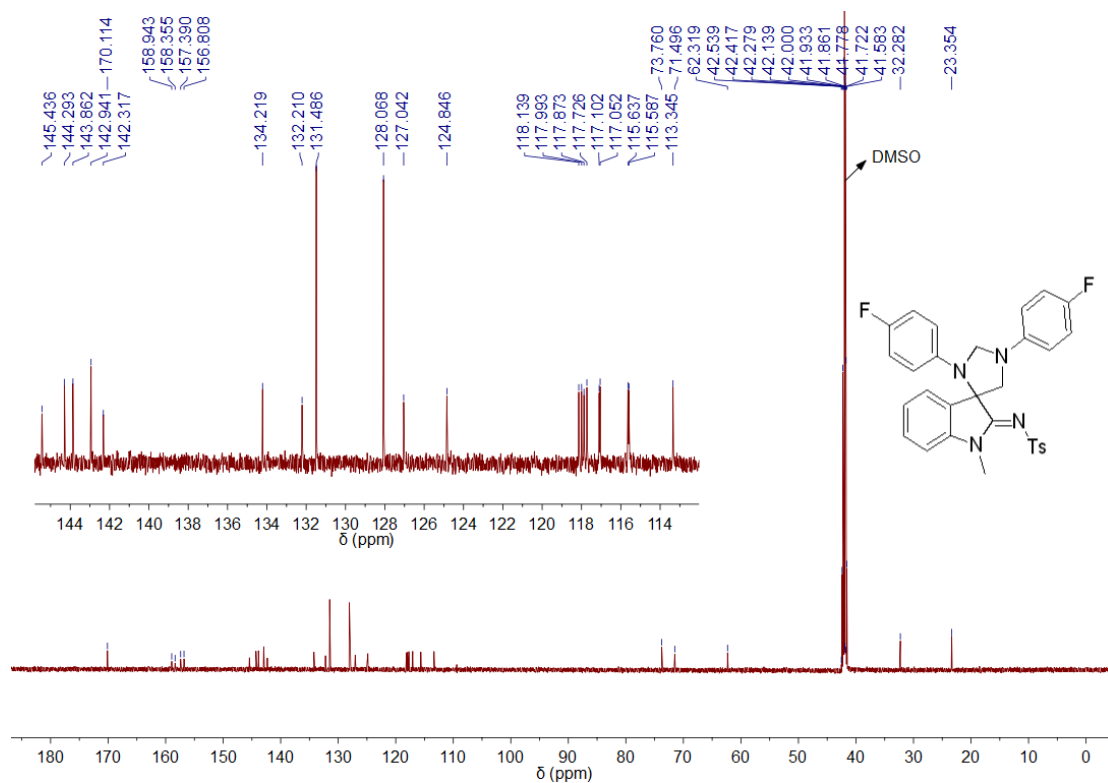

**<sup>13</sup>C NMR of Compound 3b**

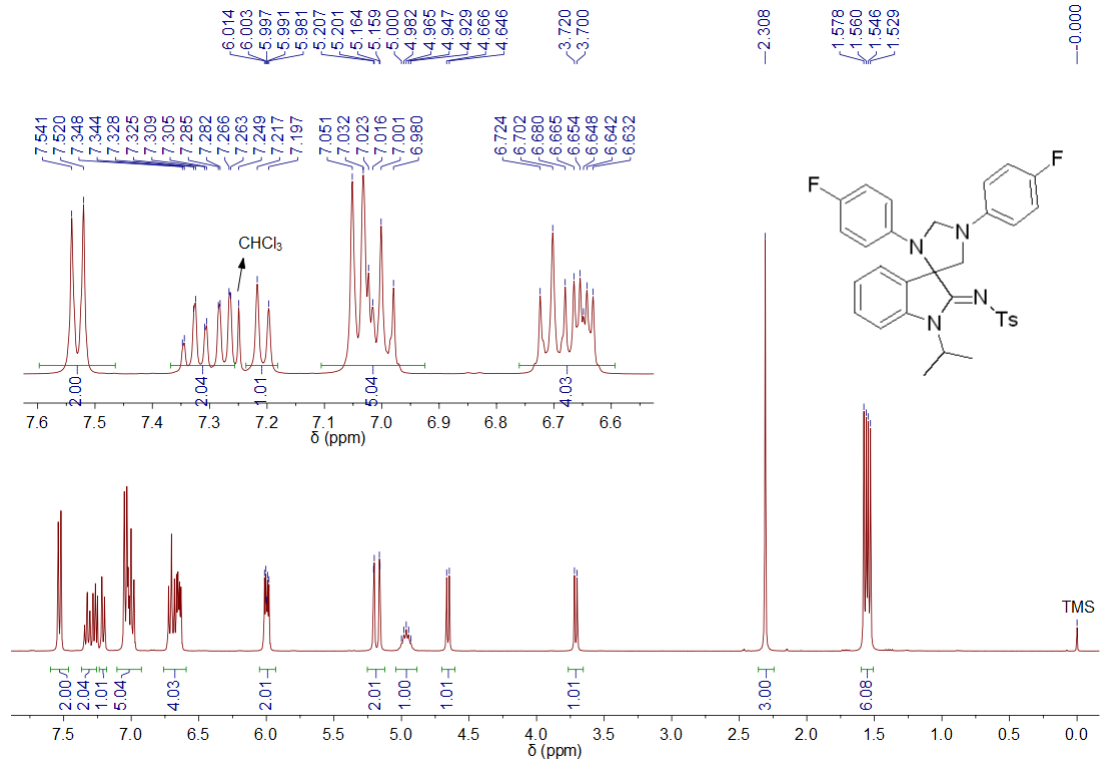

**<sup>1</sup>H NMR of Compound 3c**

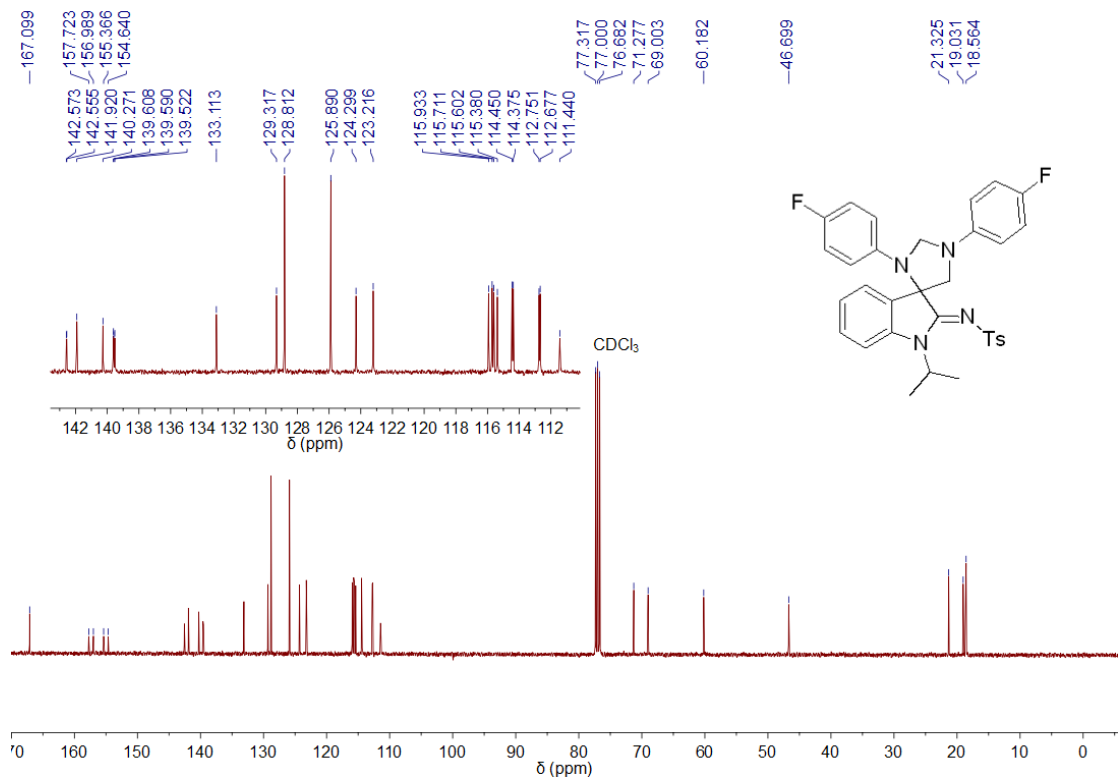

**<sup>13</sup>C NMR of Compound 3c**

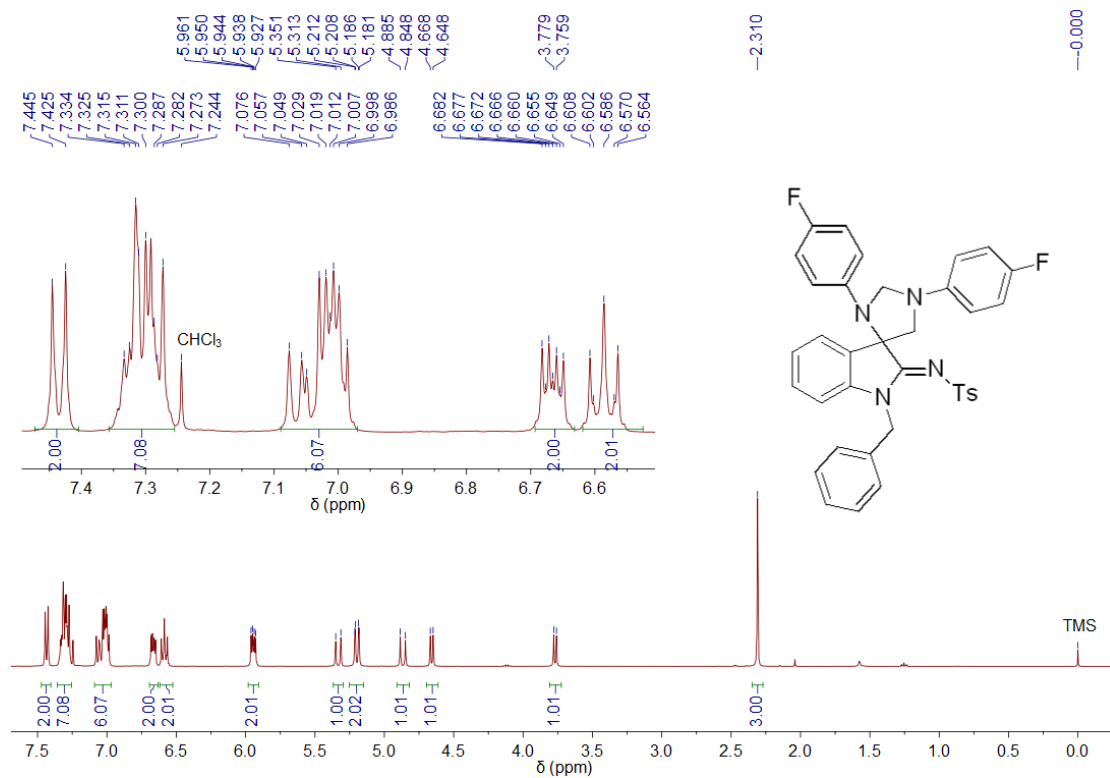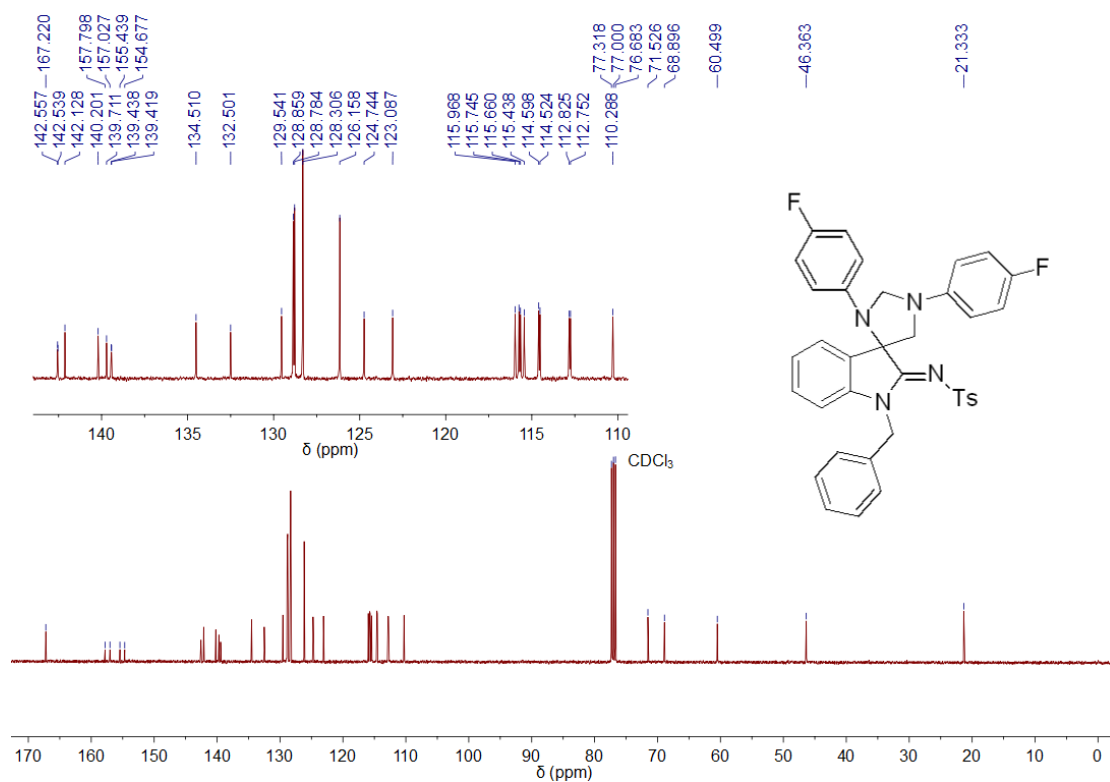

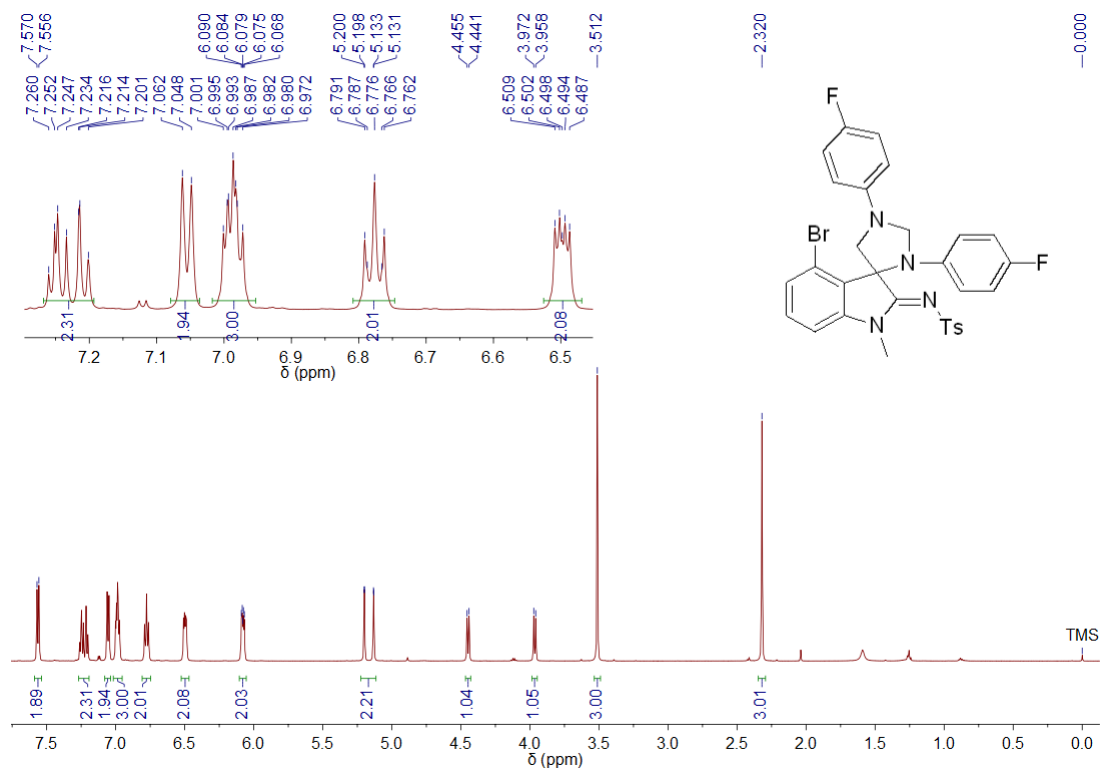

**<sup>1</sup>H NMR of Compound 3e**

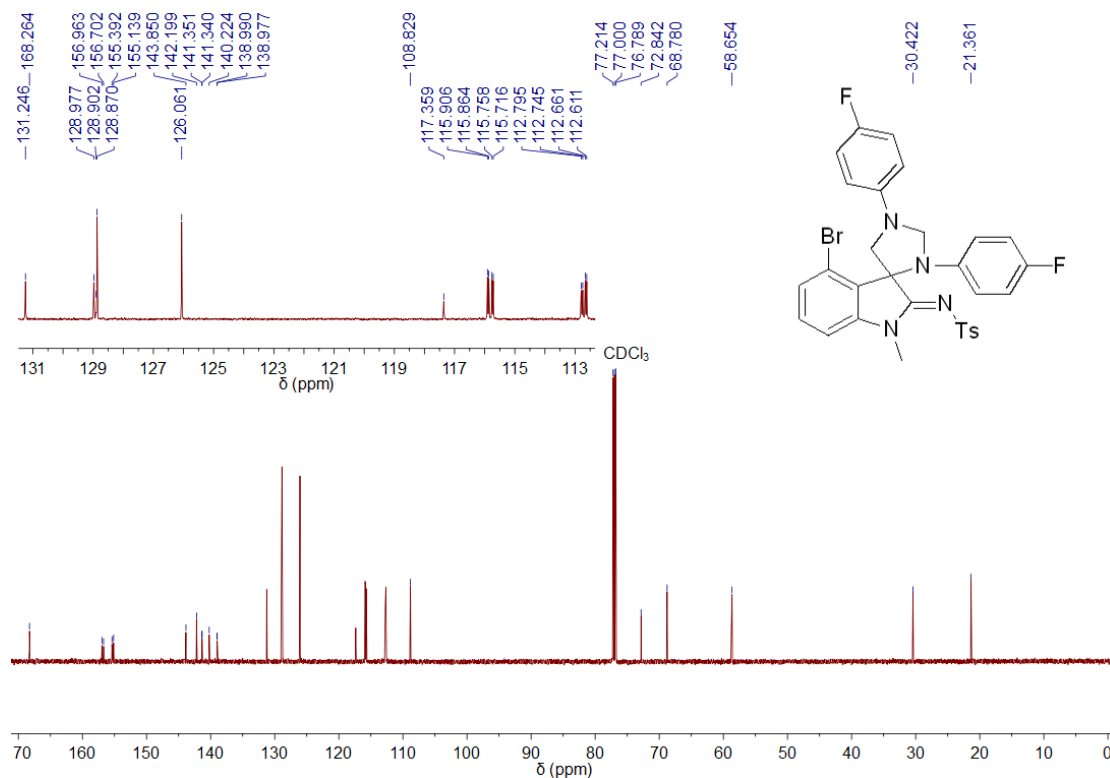

**<sup>13</sup>C NMR of Compound 3e**



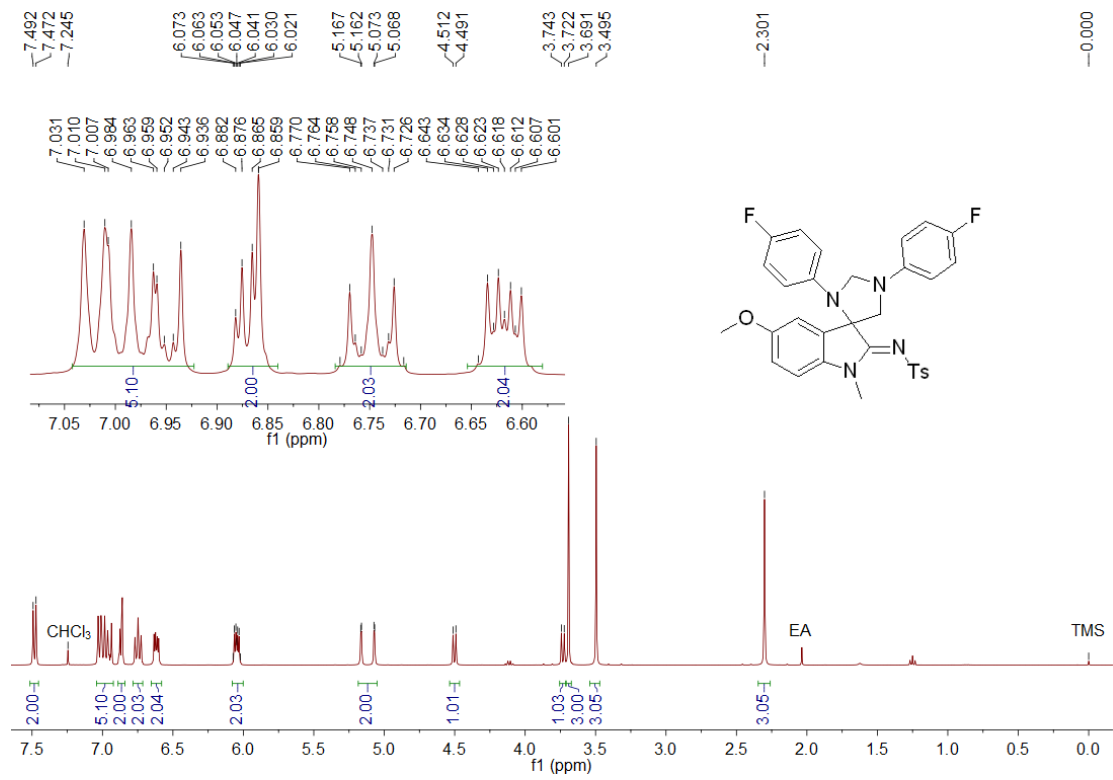

**<sup>1</sup>H NMR of Compound 3f**

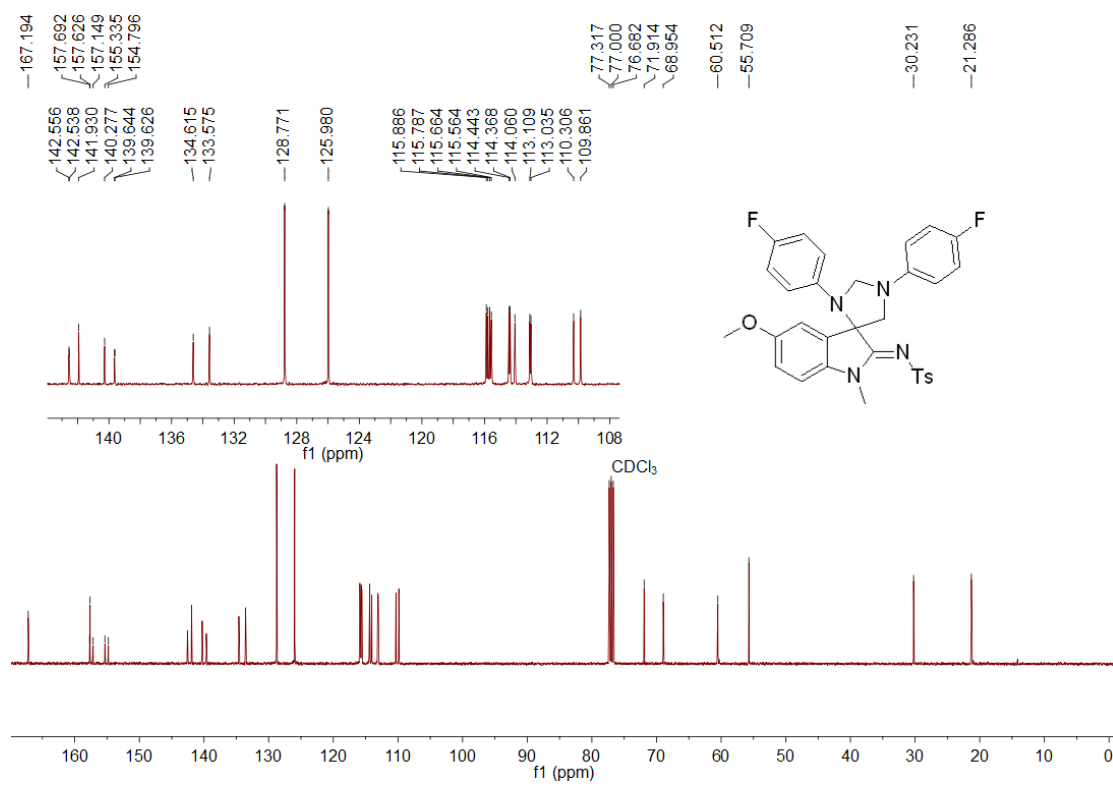

**<sup>13</sup>C NMR of Compound 3f**

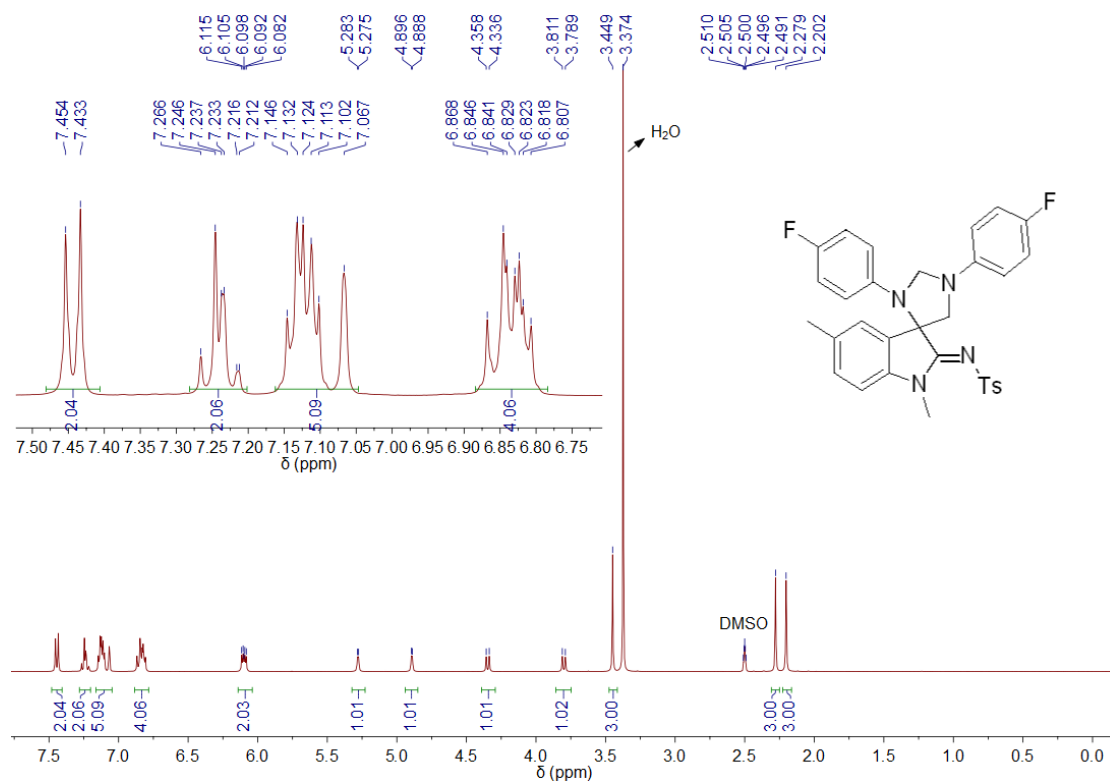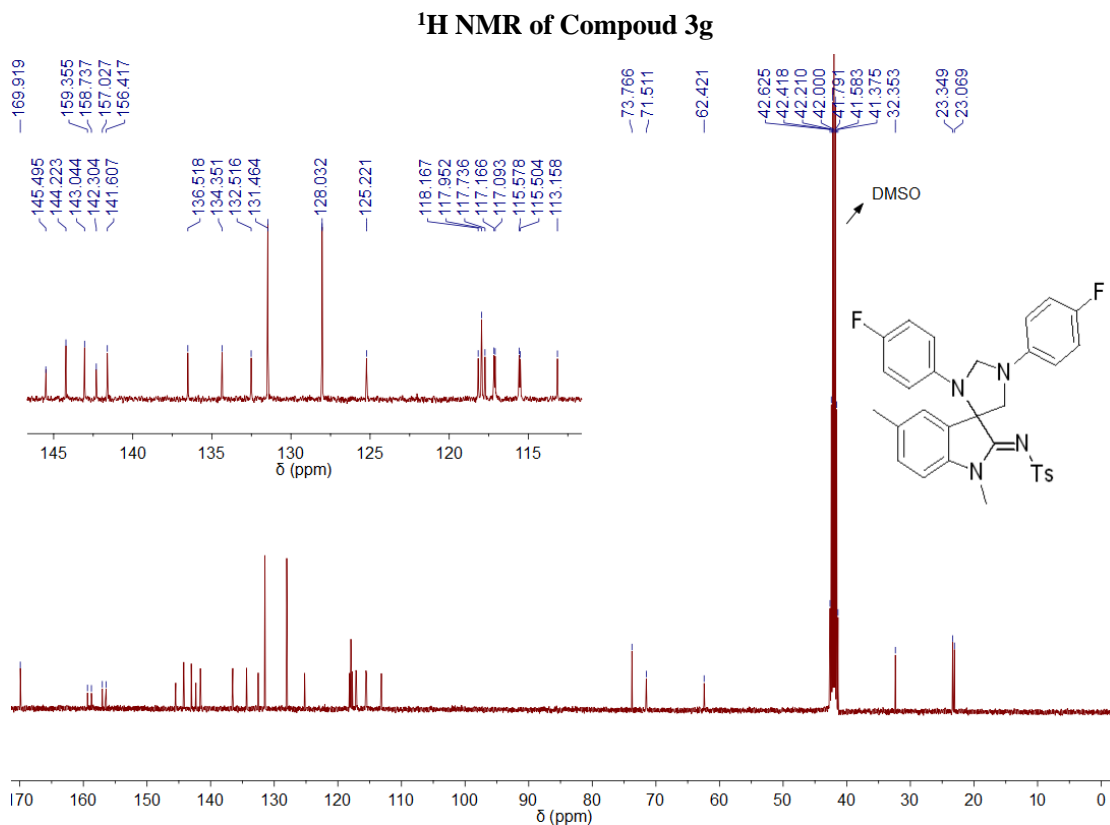

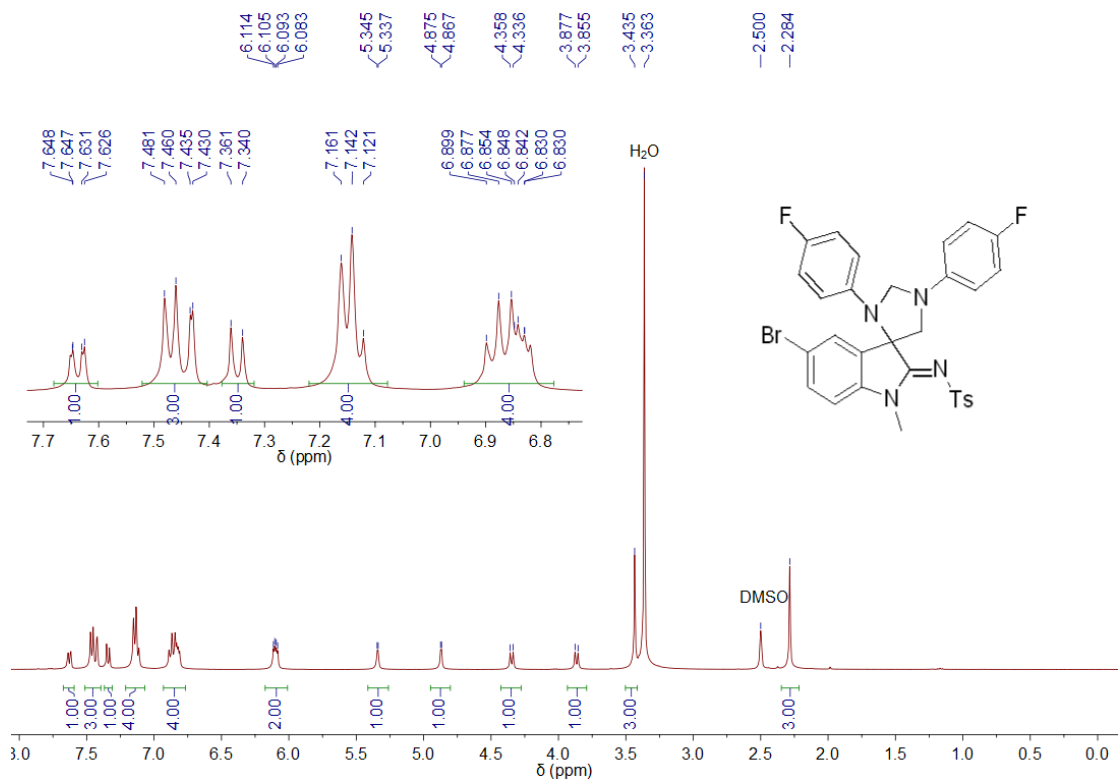

**<sup>1</sup>H NMR of Compound 3h**

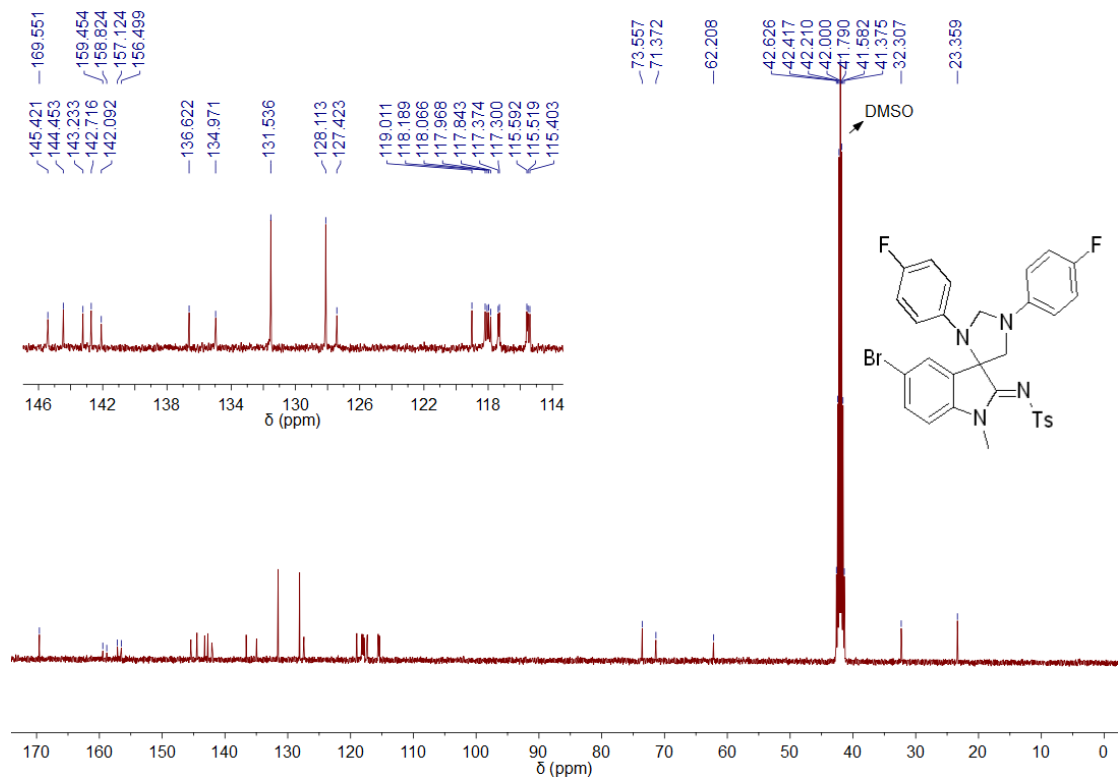

**<sup>13</sup>C NMR of Compound 3h**

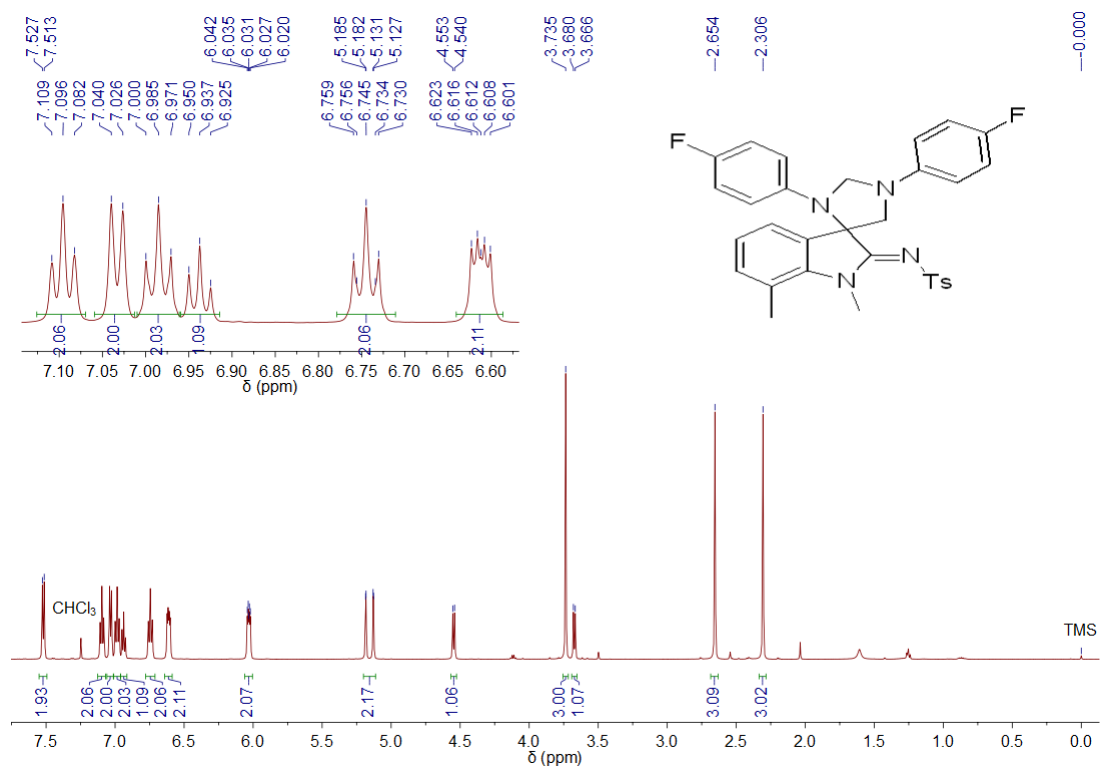

**<sup>1</sup>H NMR of Compound 3i**

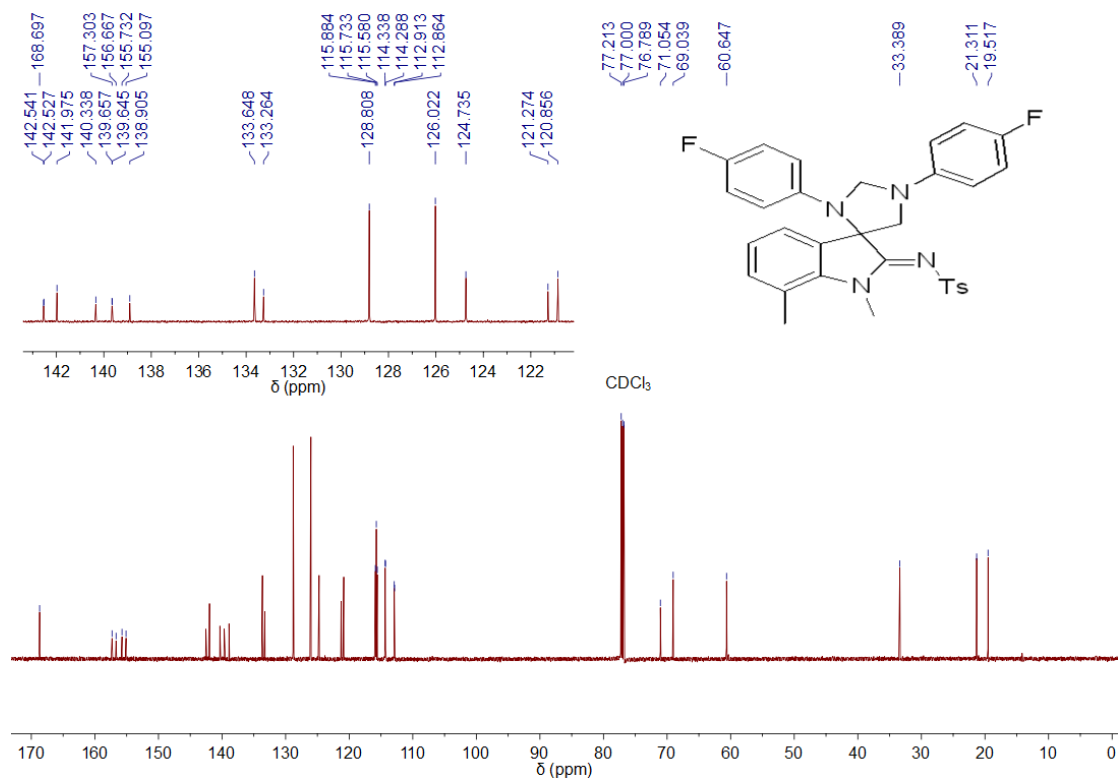

**<sup>13</sup>C NMR of Compound 3i**

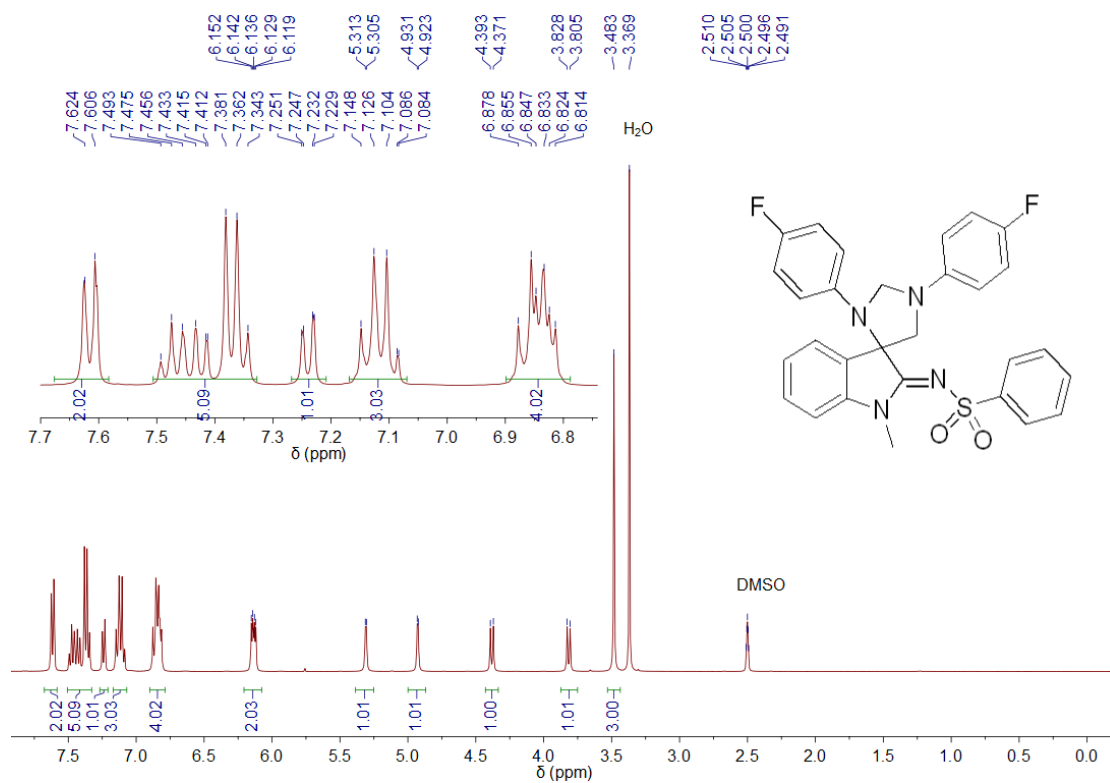

**<sup>1</sup>H NMR of Compound 3j**

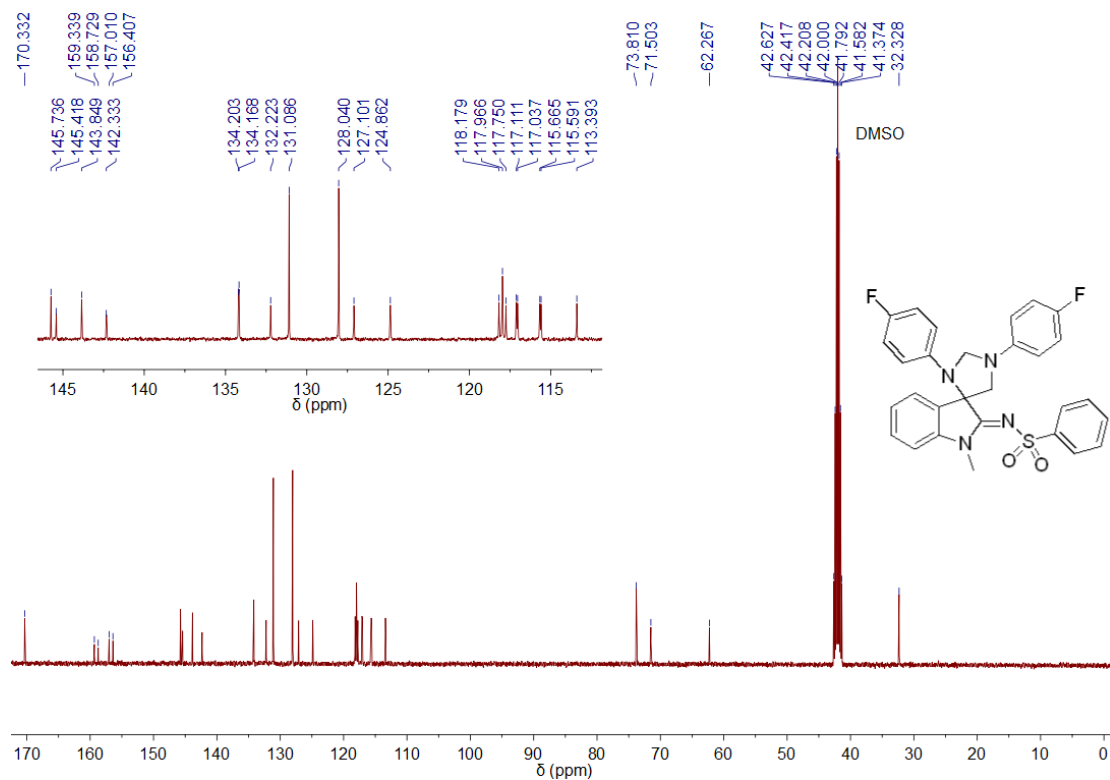

**<sup>13</sup>C NMR of Compound 3j**

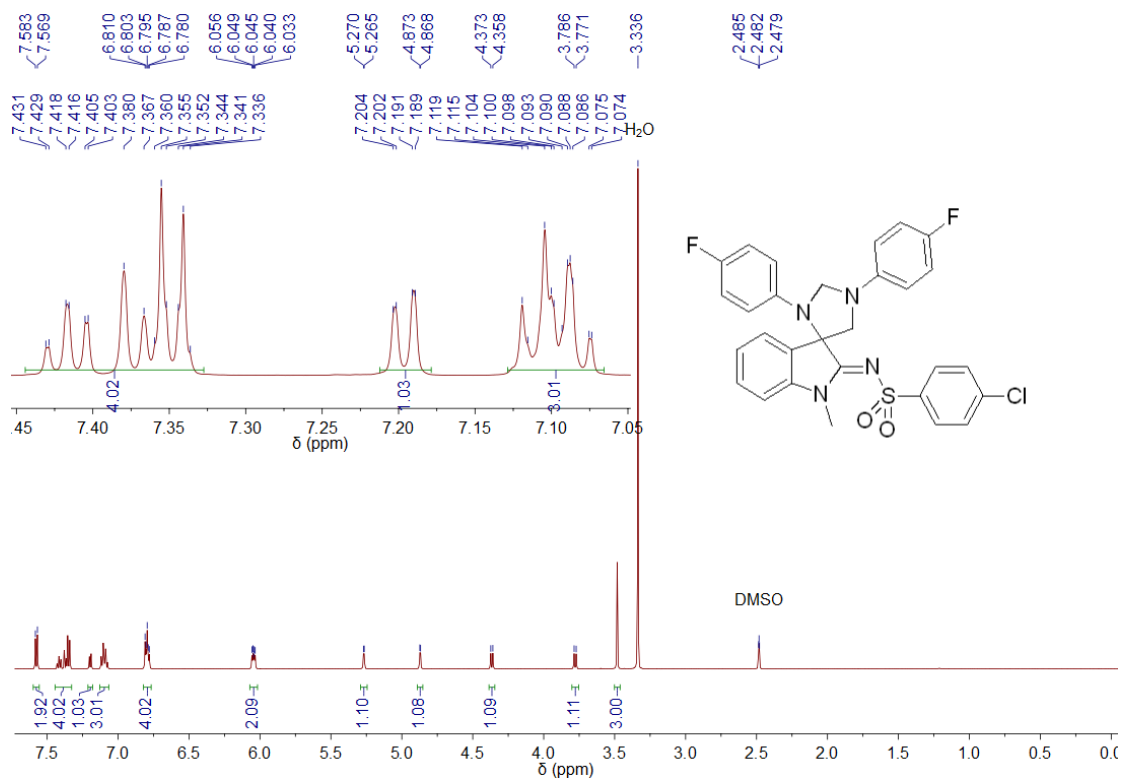

**<sup>1</sup>H NMR of Compound 3k**

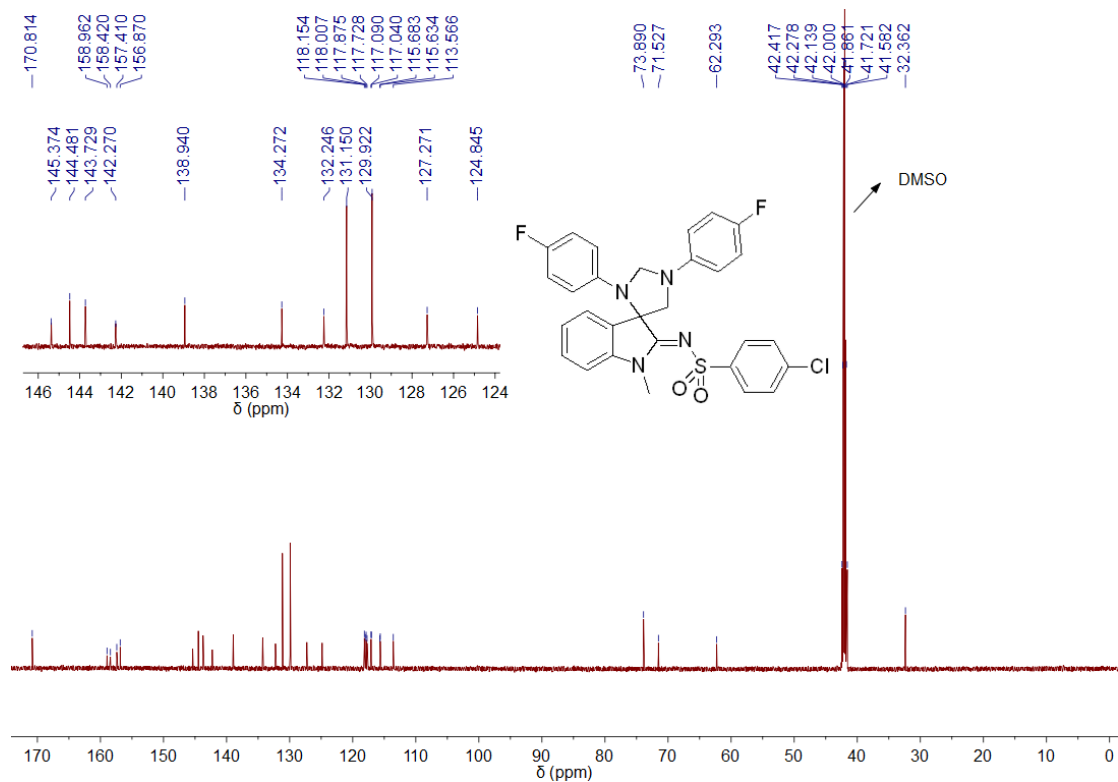

**<sup>13</sup>C NMR of Compound 3k**

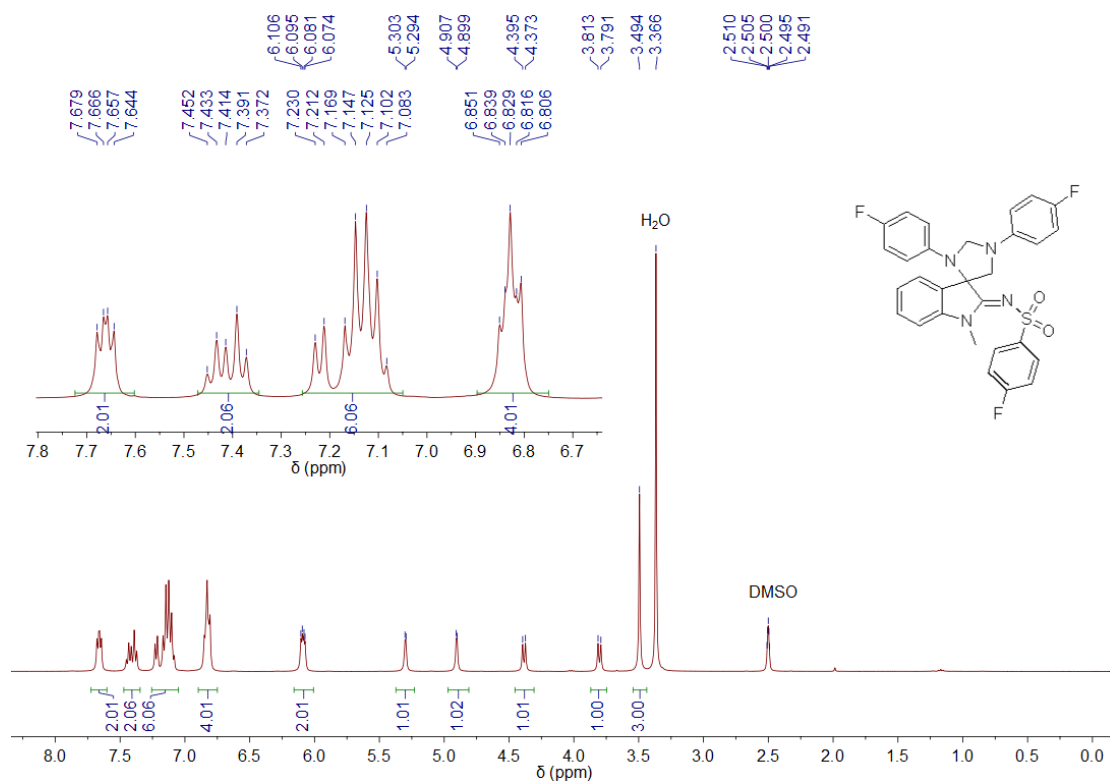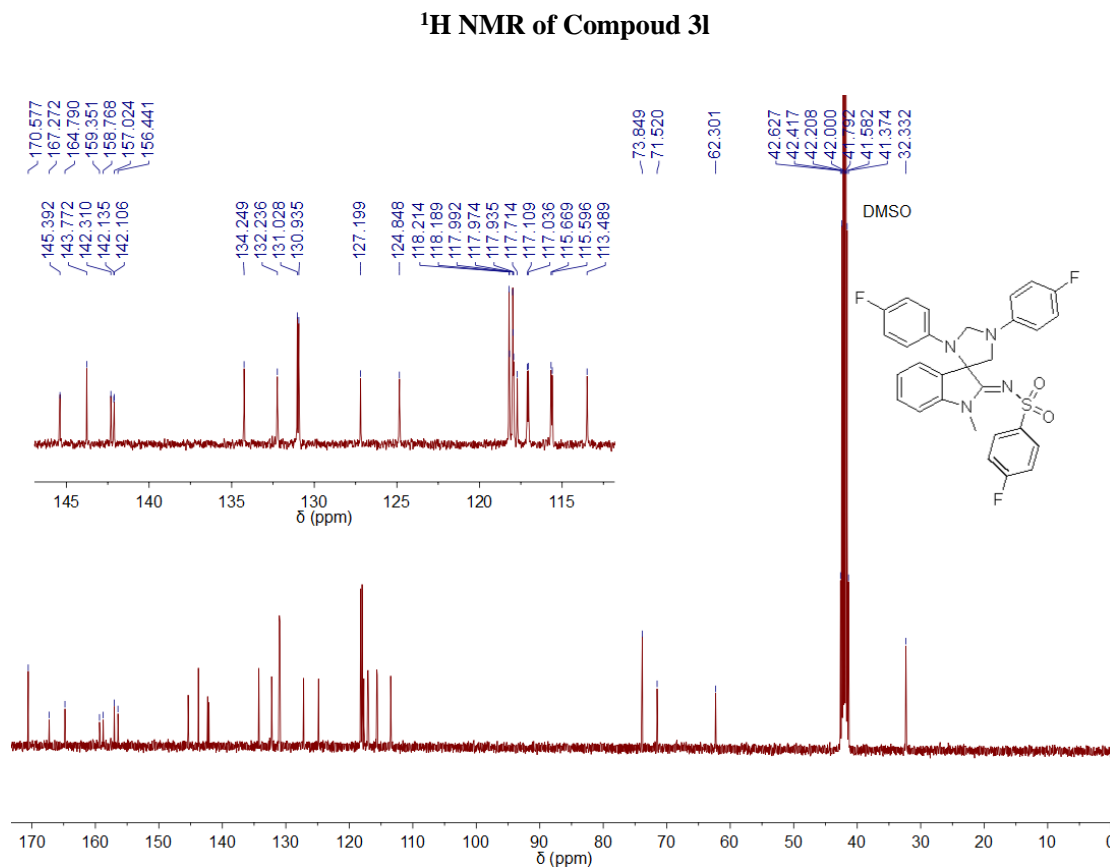

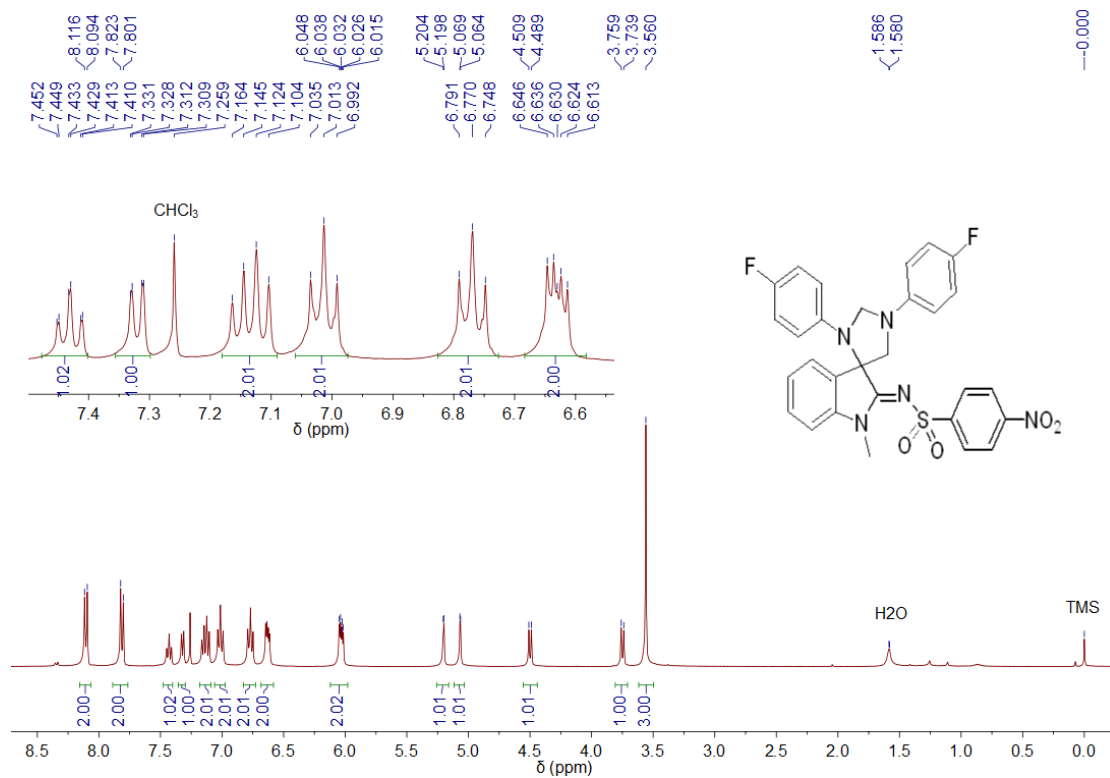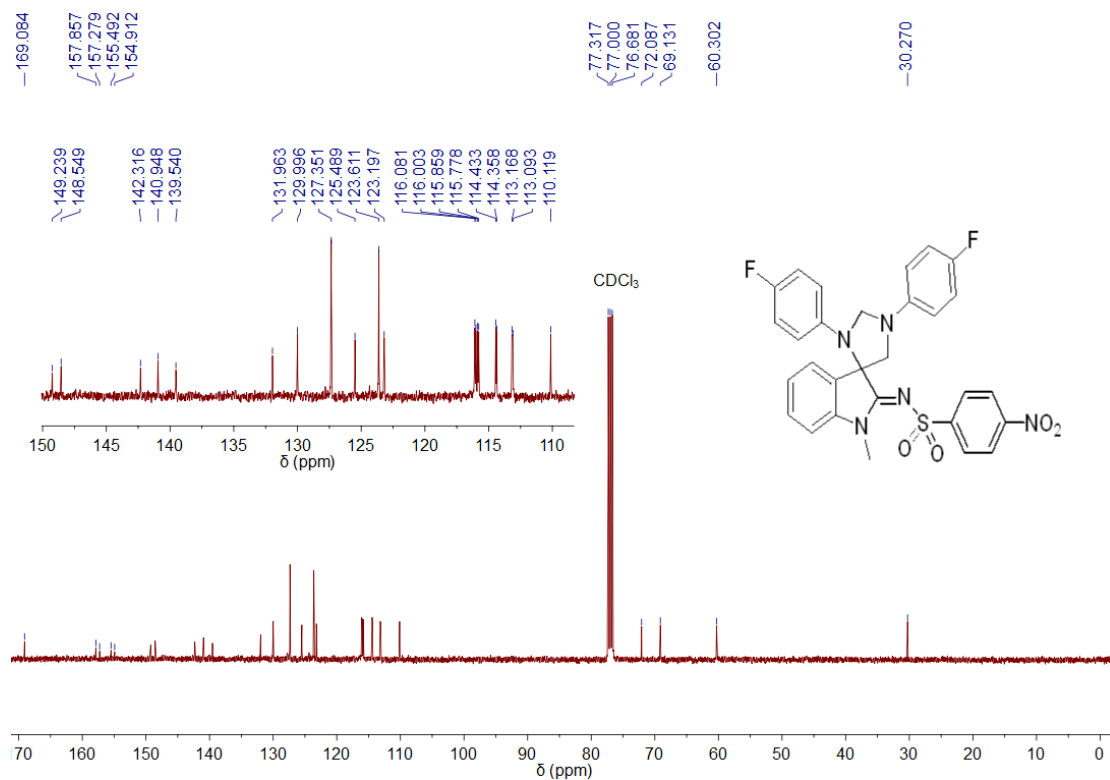



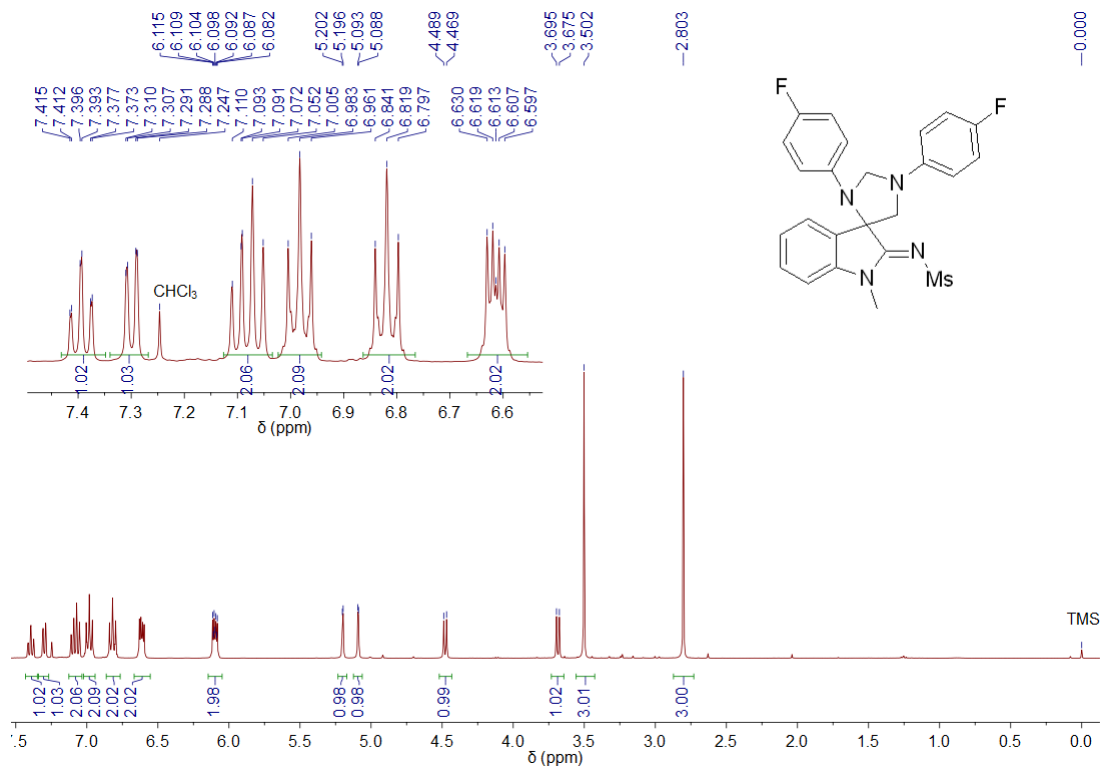

**<sup>1</sup>H NMR of Compound 3n**

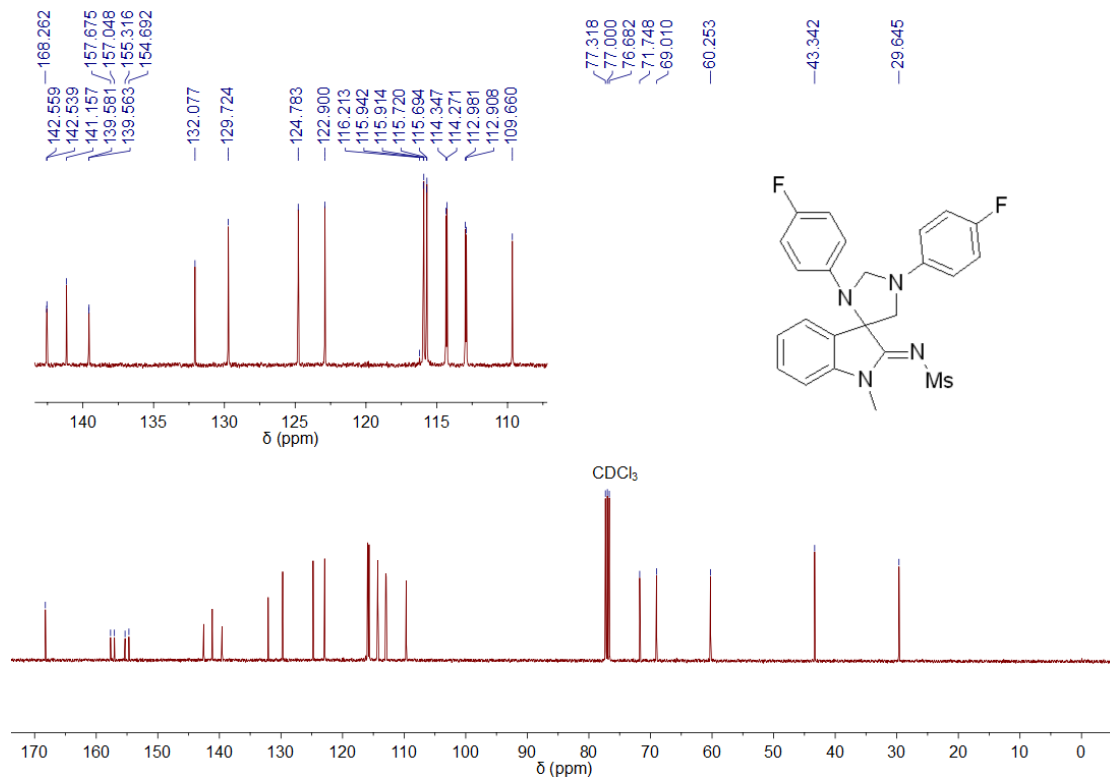

**<sup>13</sup>C NMR of Compound 3n**

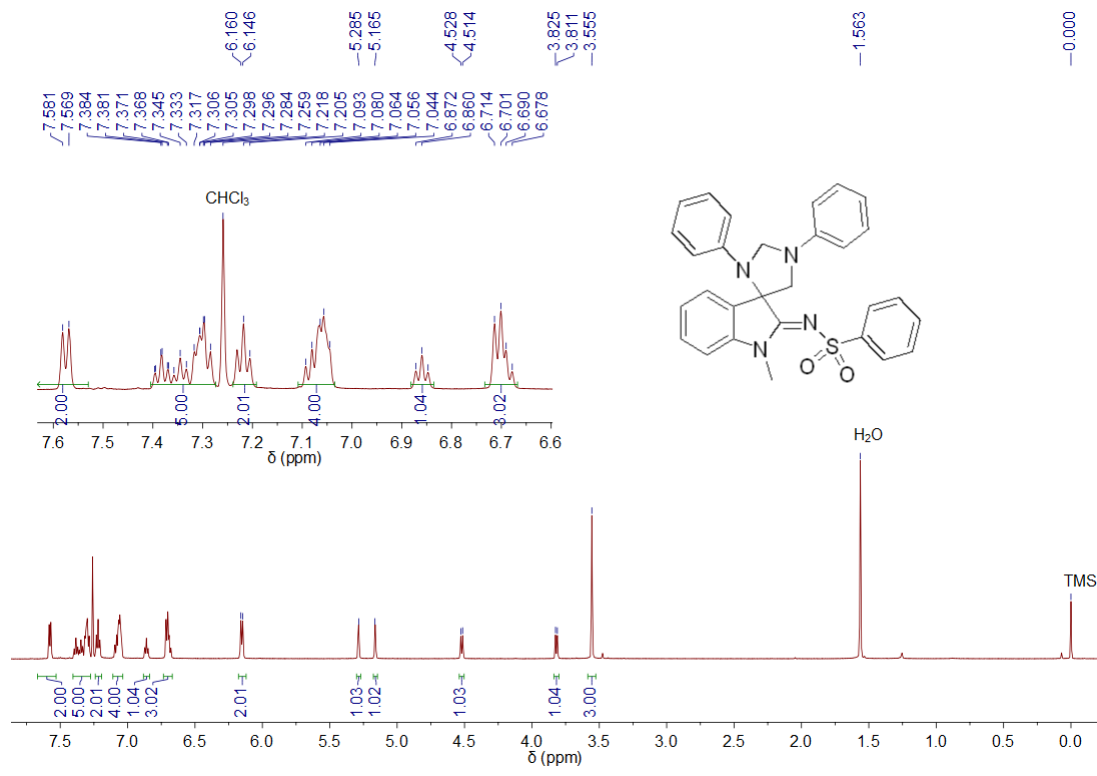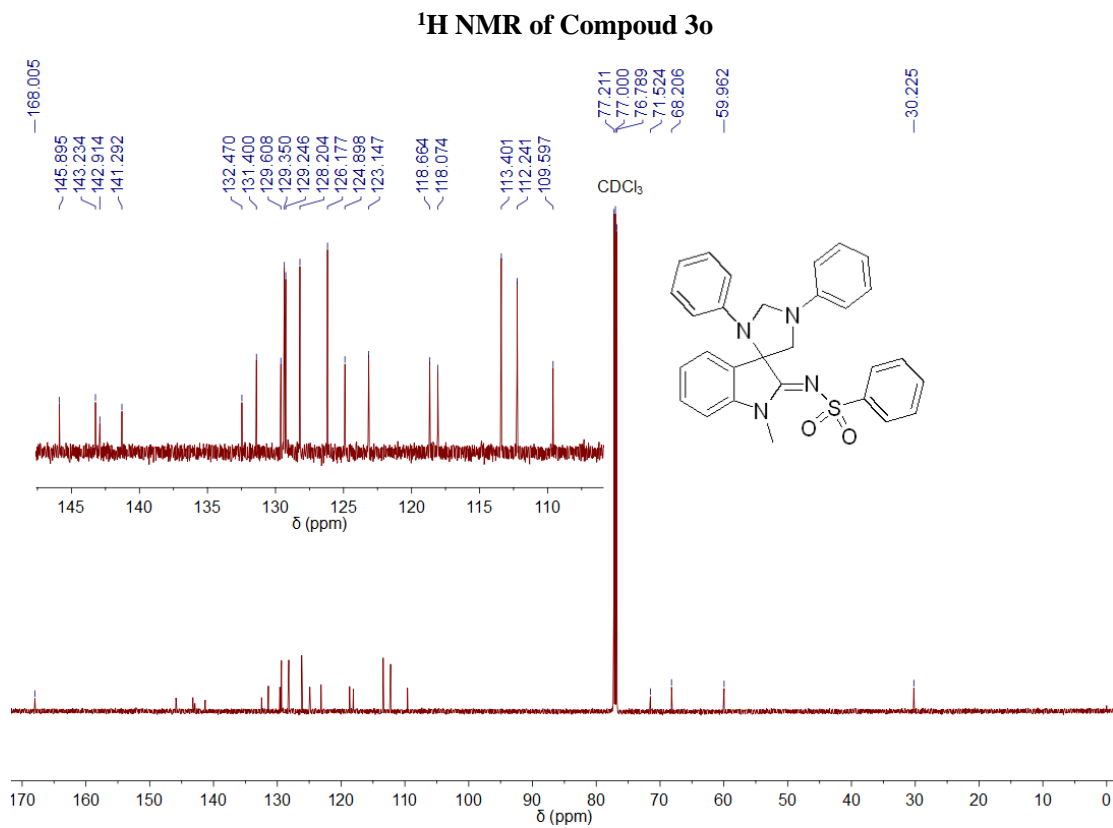

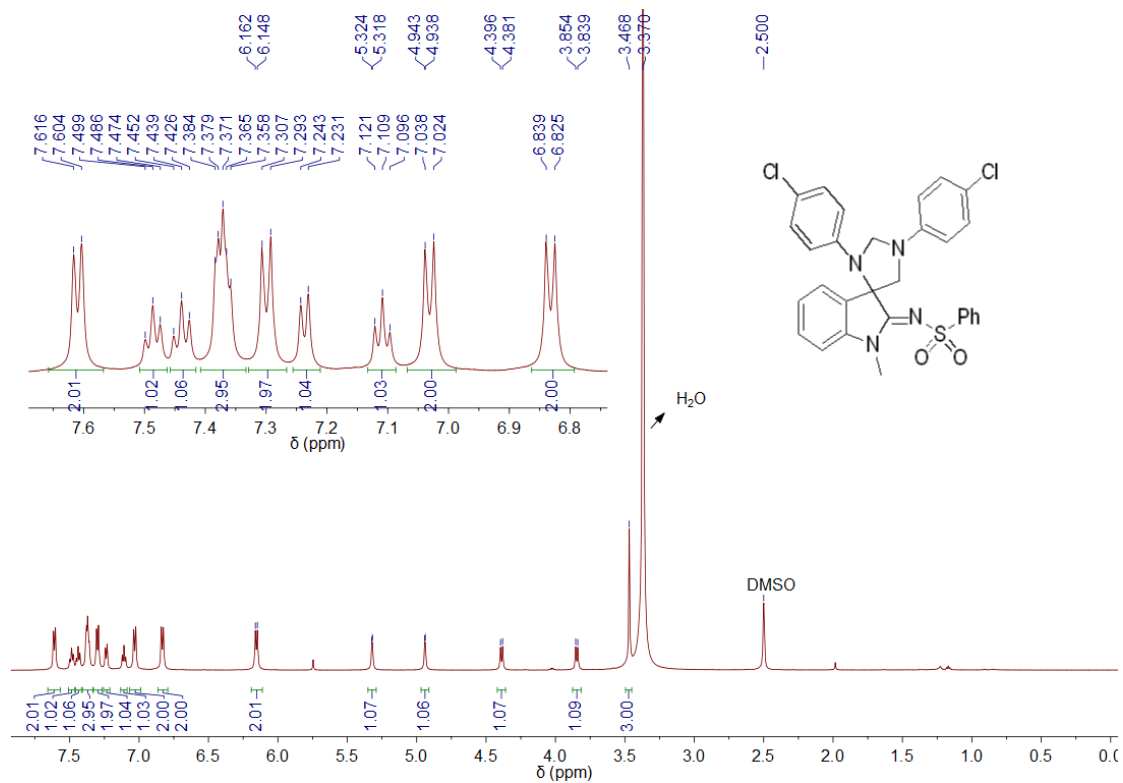

**<sup>1</sup>H NMR of Compound 3p**

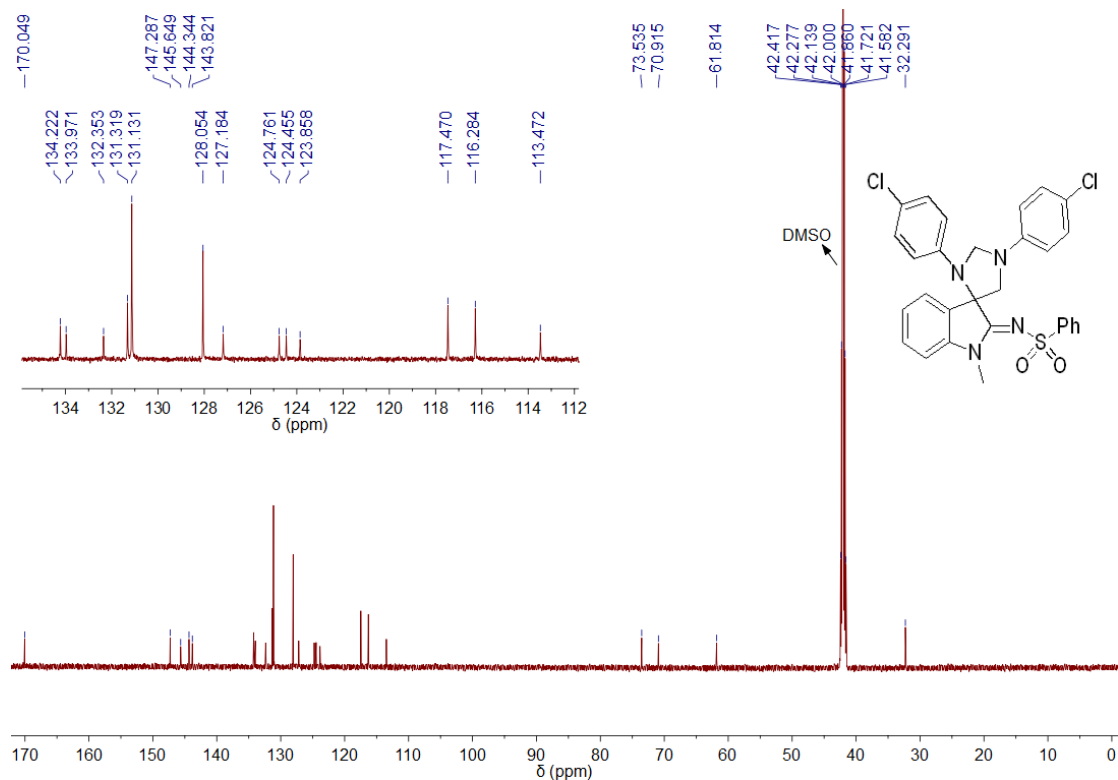

**<sup>13</sup>C NMR of Compound 3p**

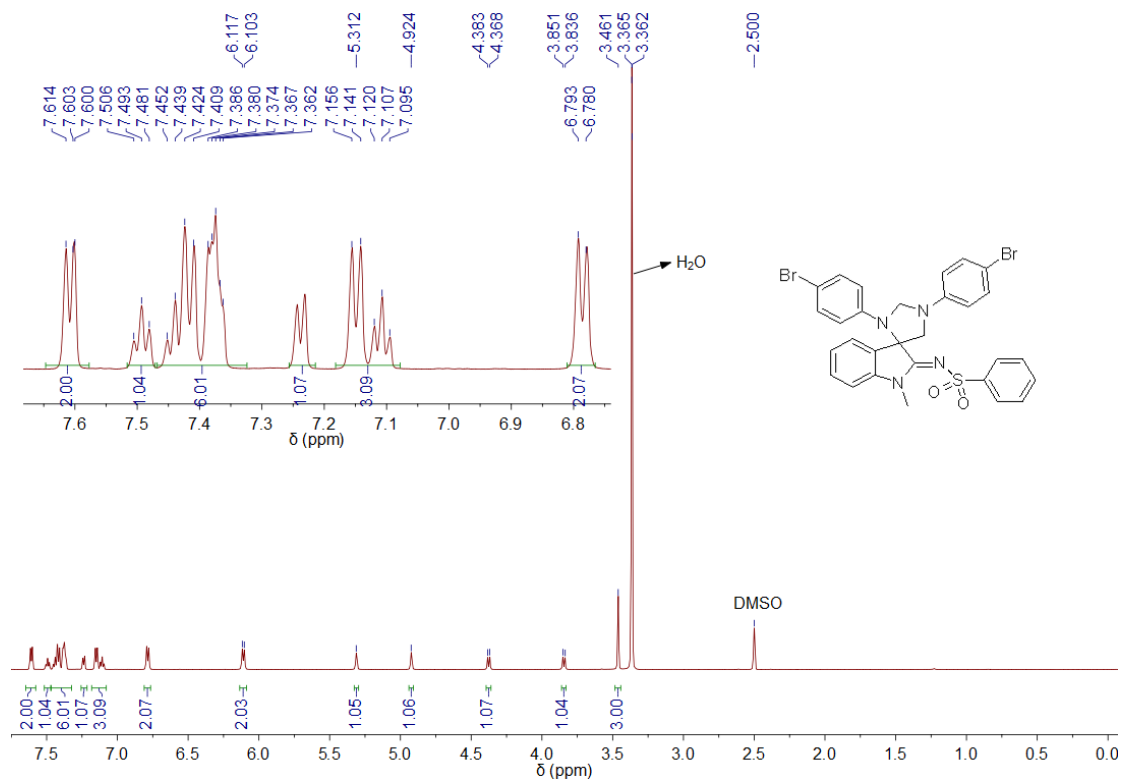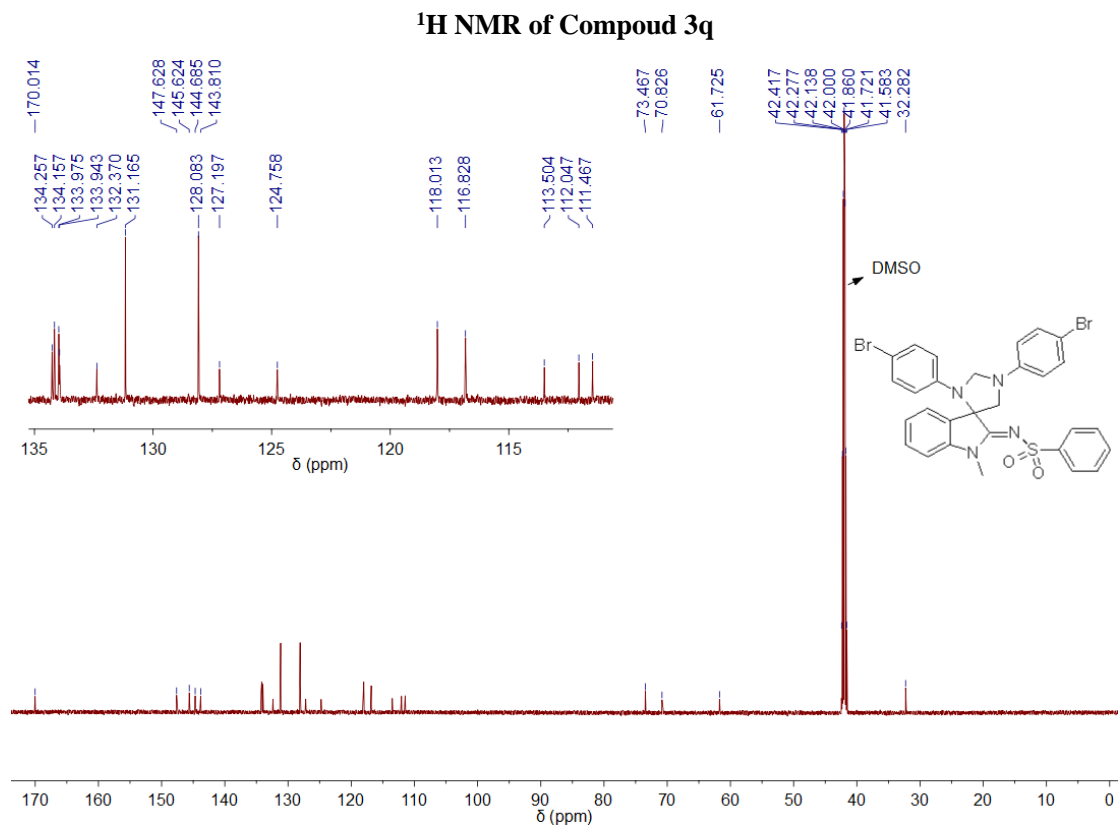

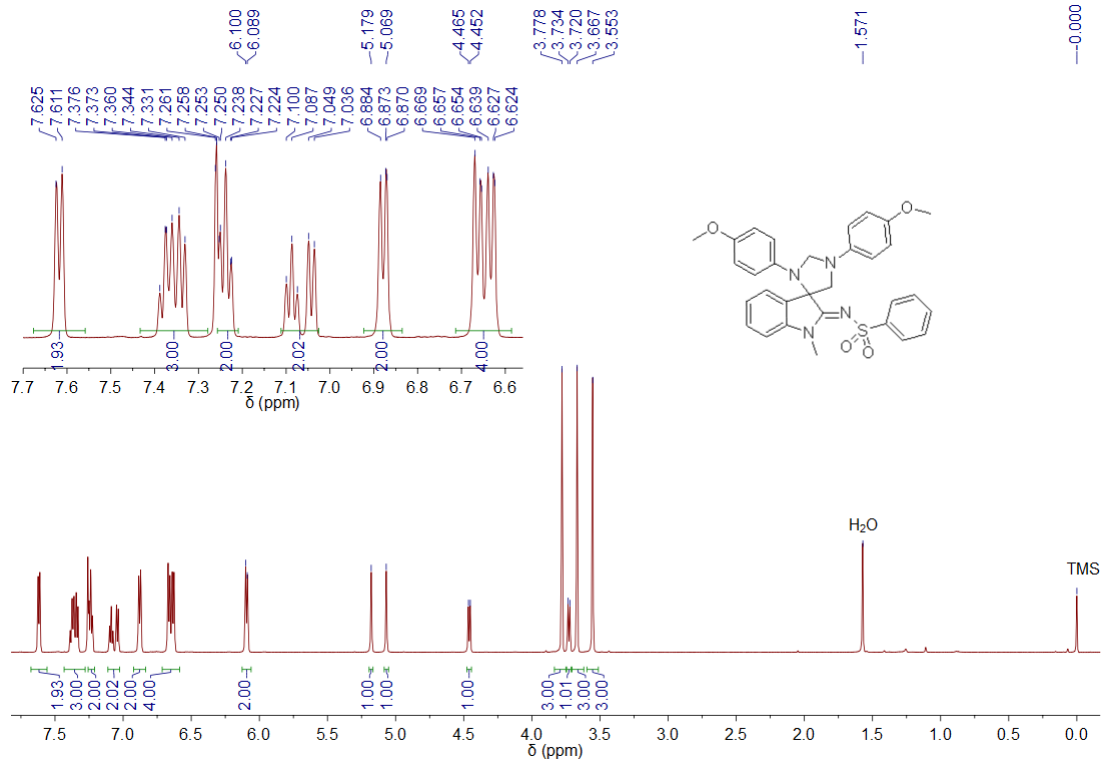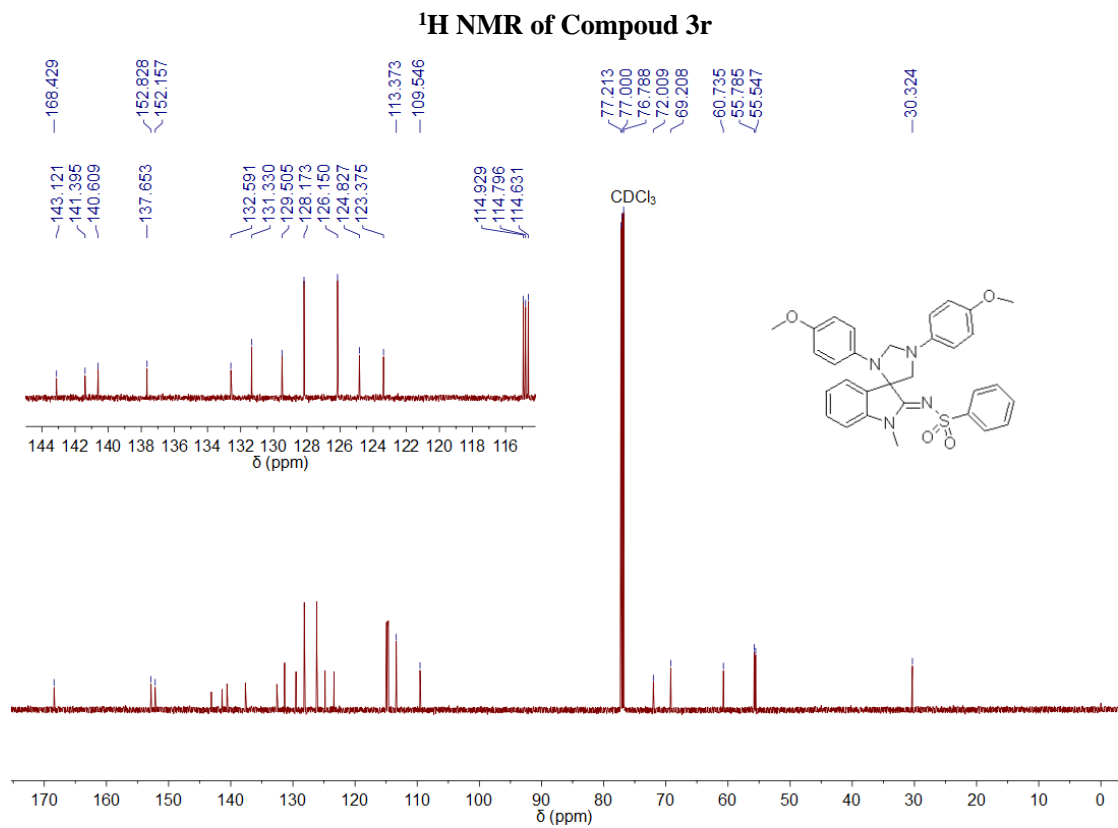

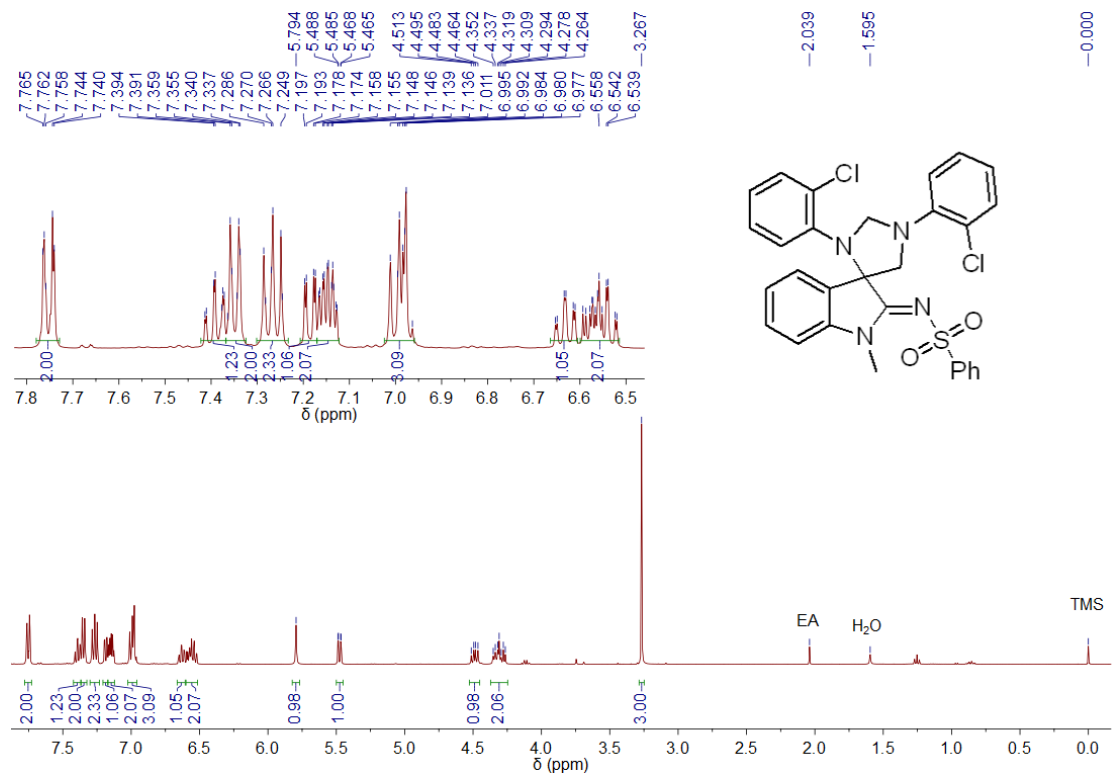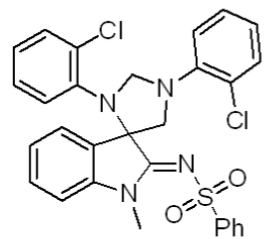

**<sup>1</sup>H NMR of Compound 3s**

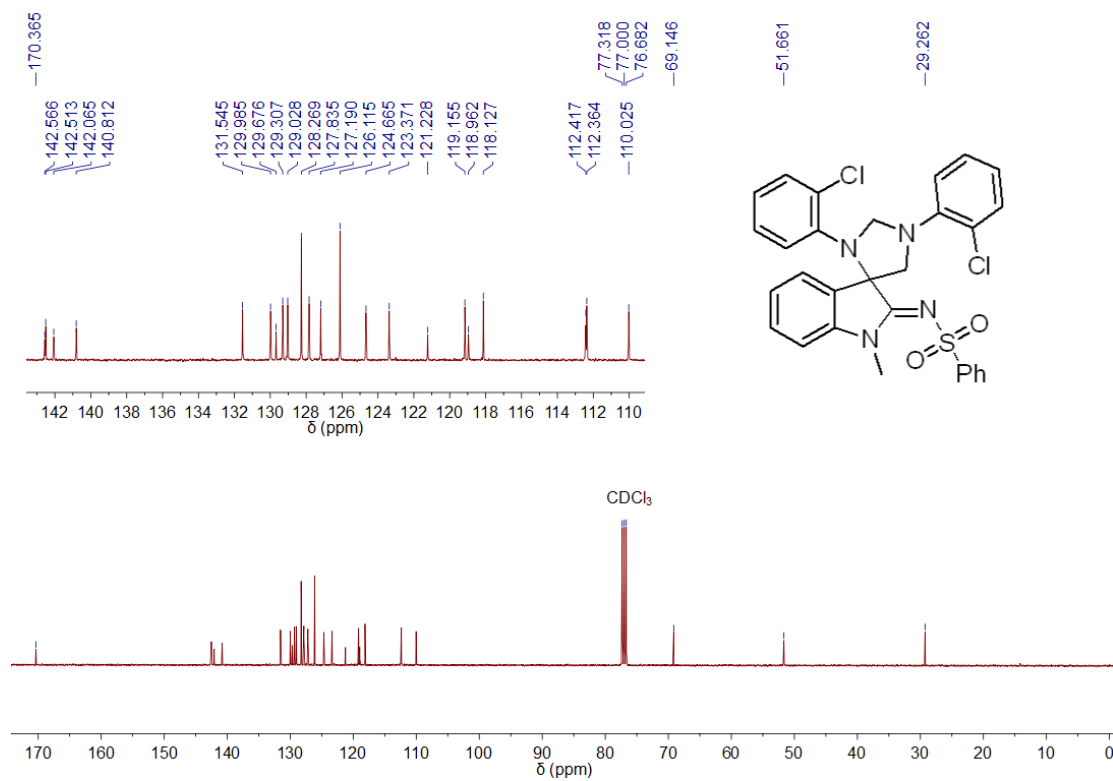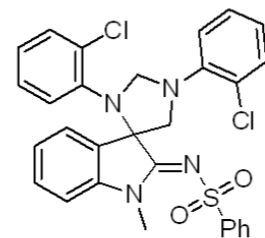

**<sup>13</sup>C NMR of Compound 3s**

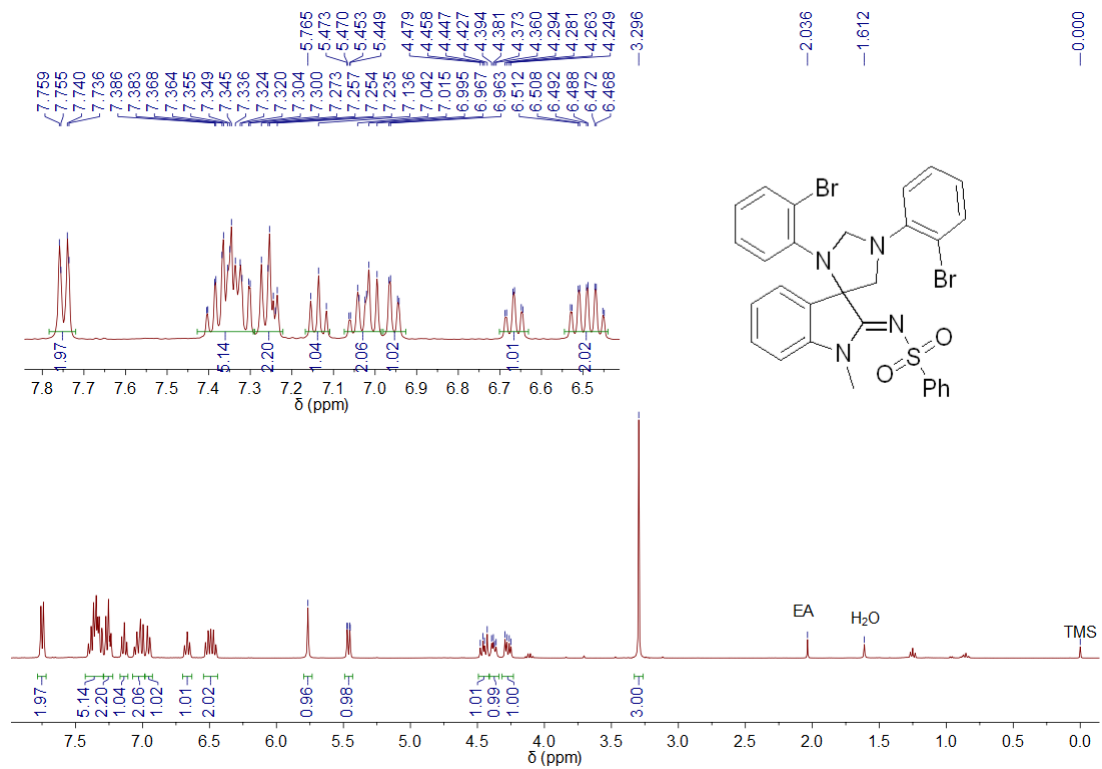

**<sup>1</sup>H NMR of Compound 3t**

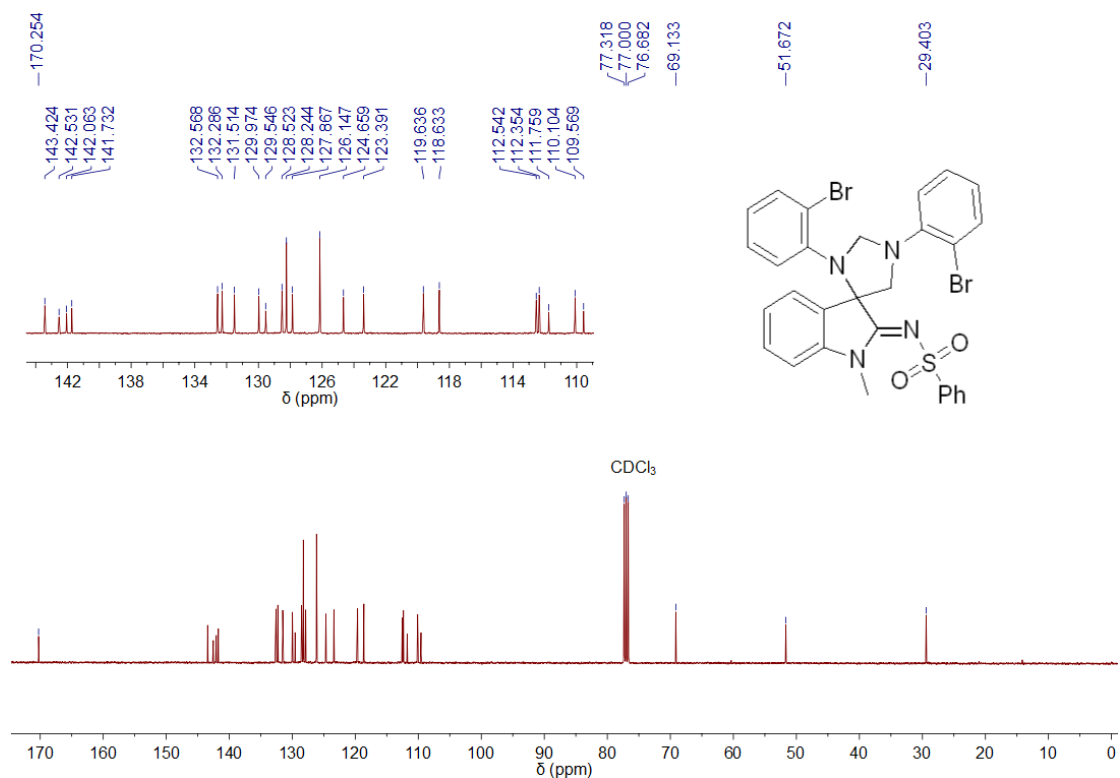

**<sup>13</sup>C NMR of Compound 3t**

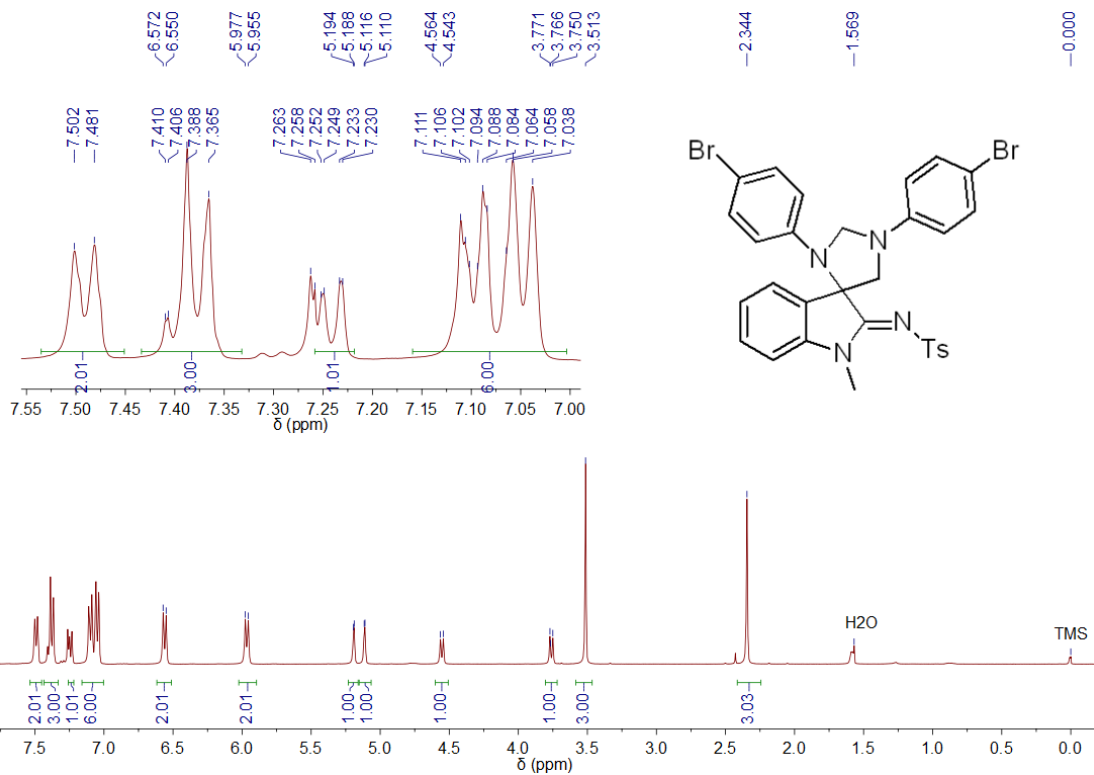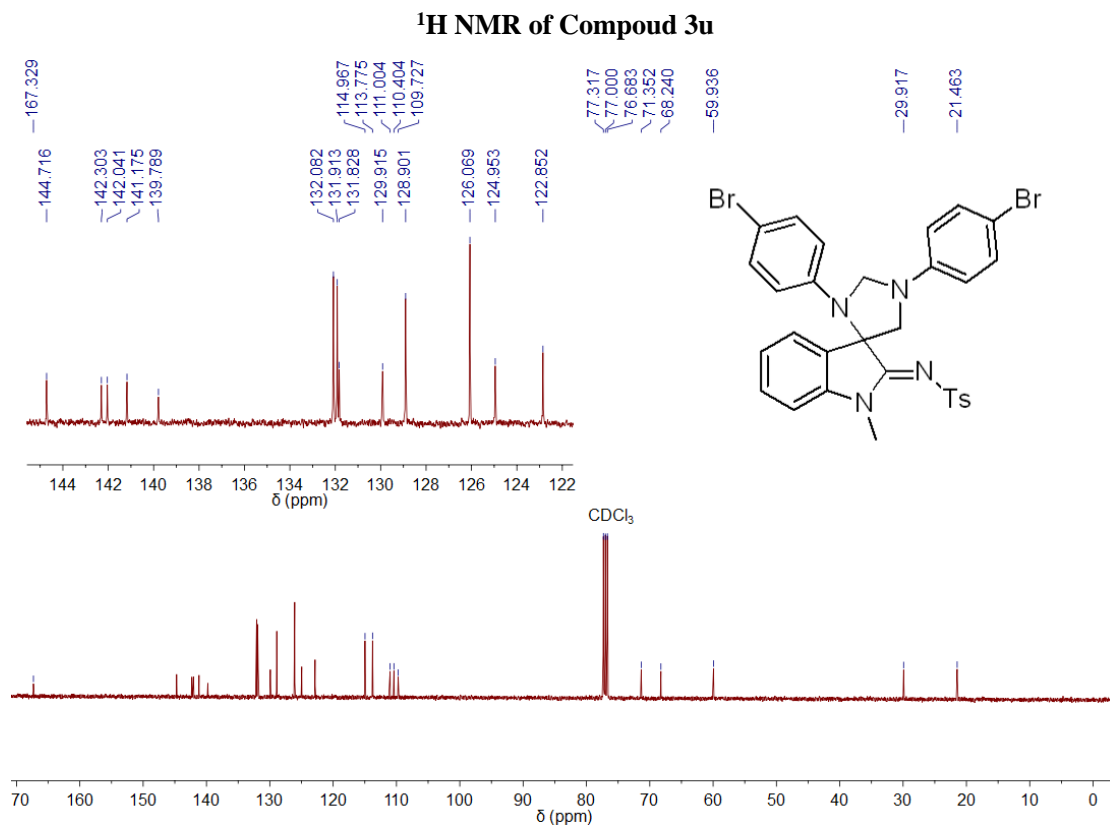



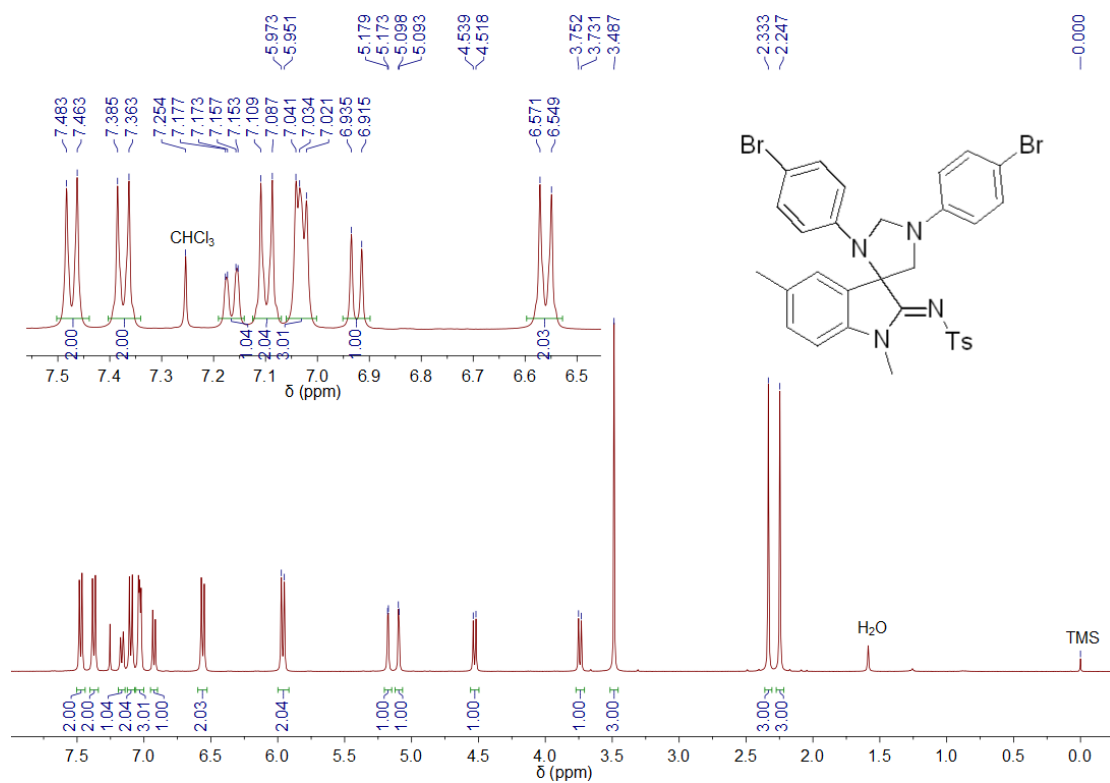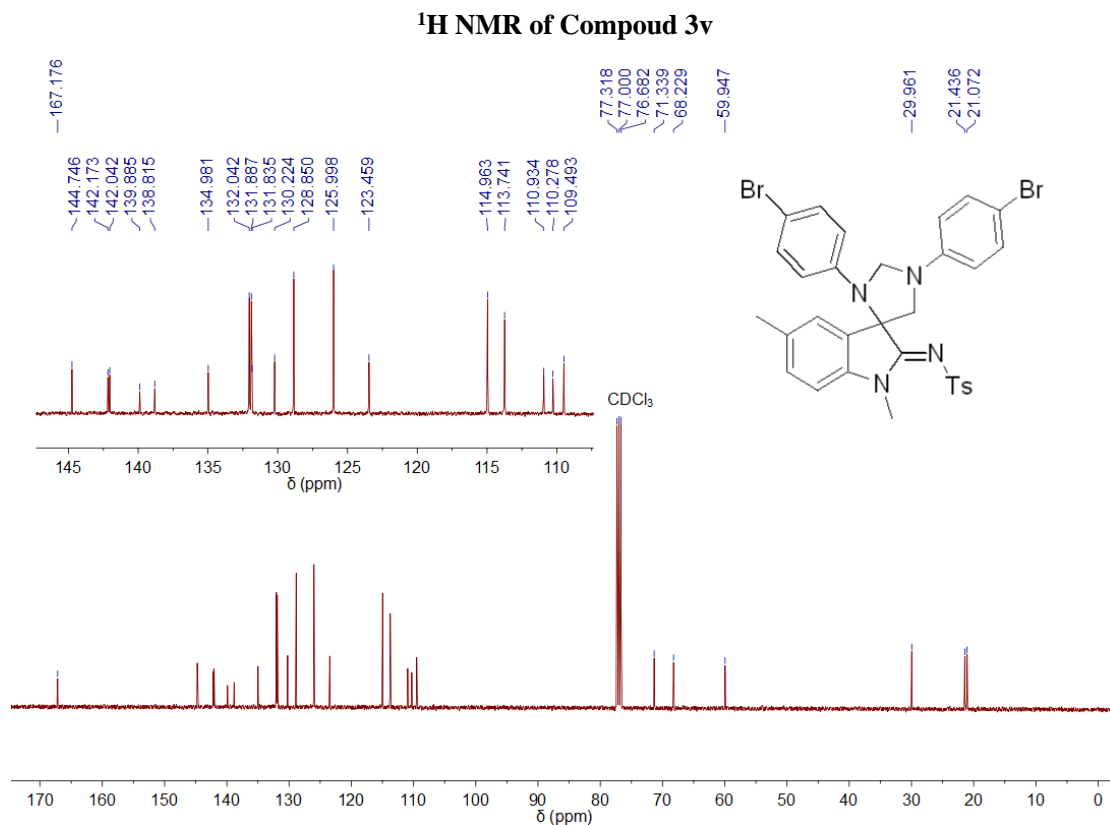

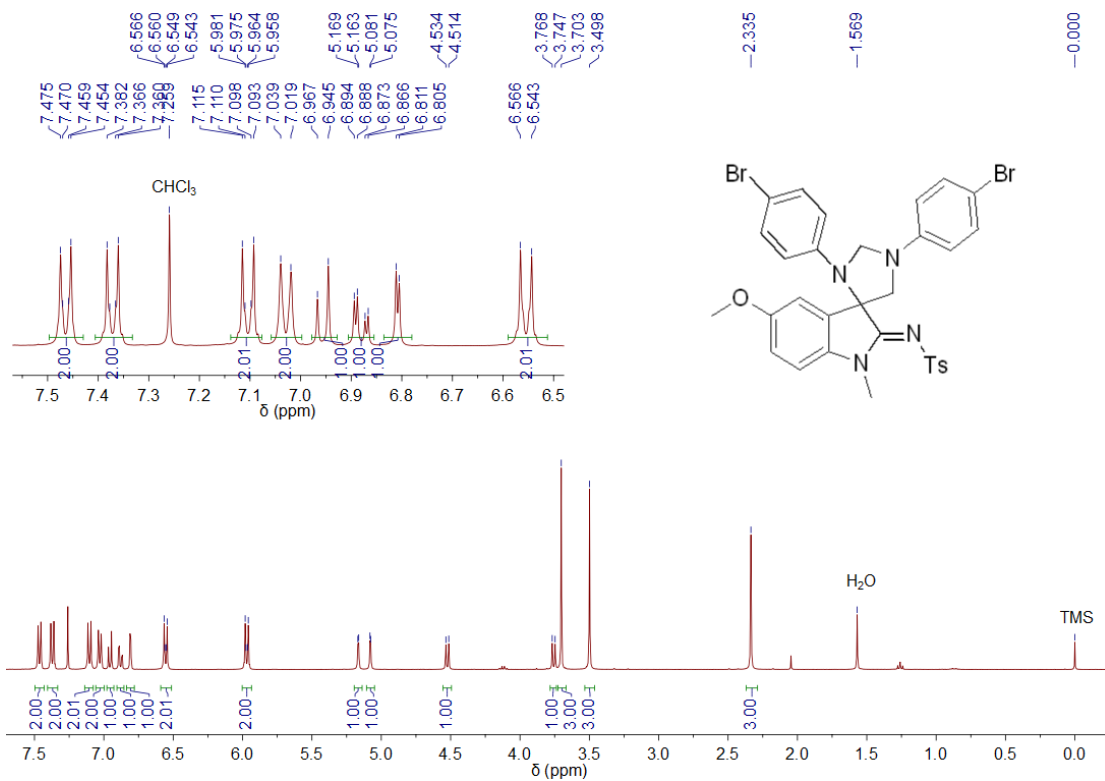

**<sup>1</sup>H NMR of Compound 3w**

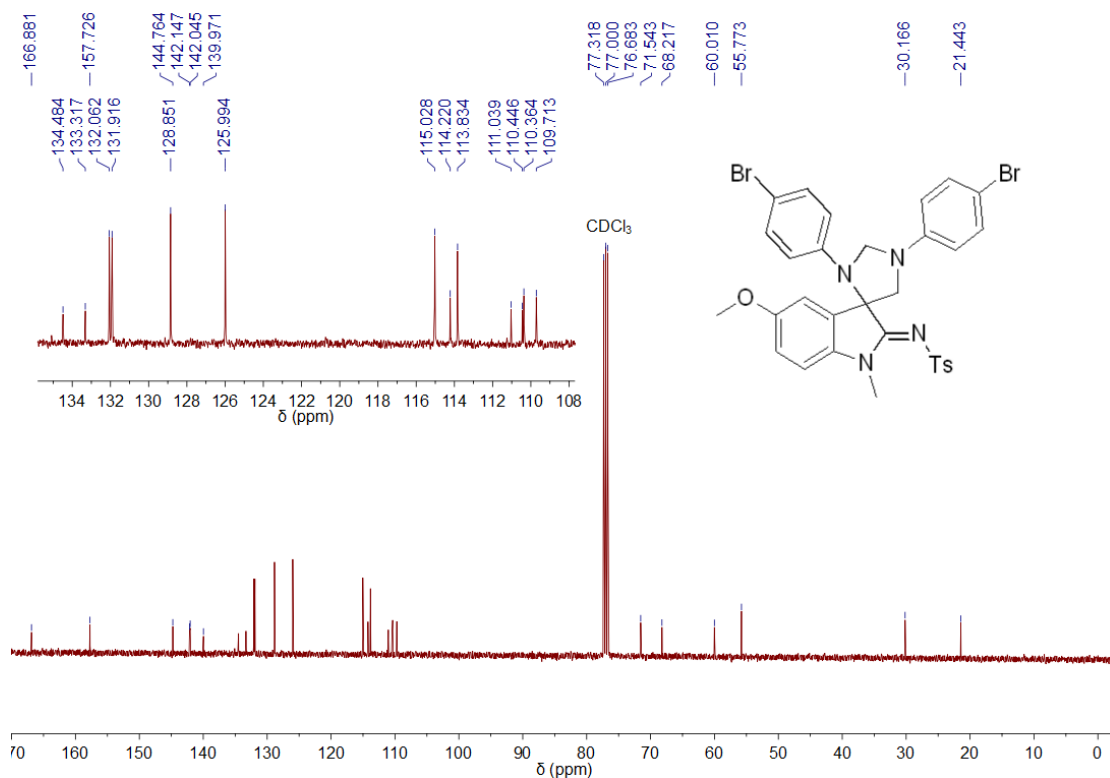

**<sup>13</sup>C NMR of Compound 3w**

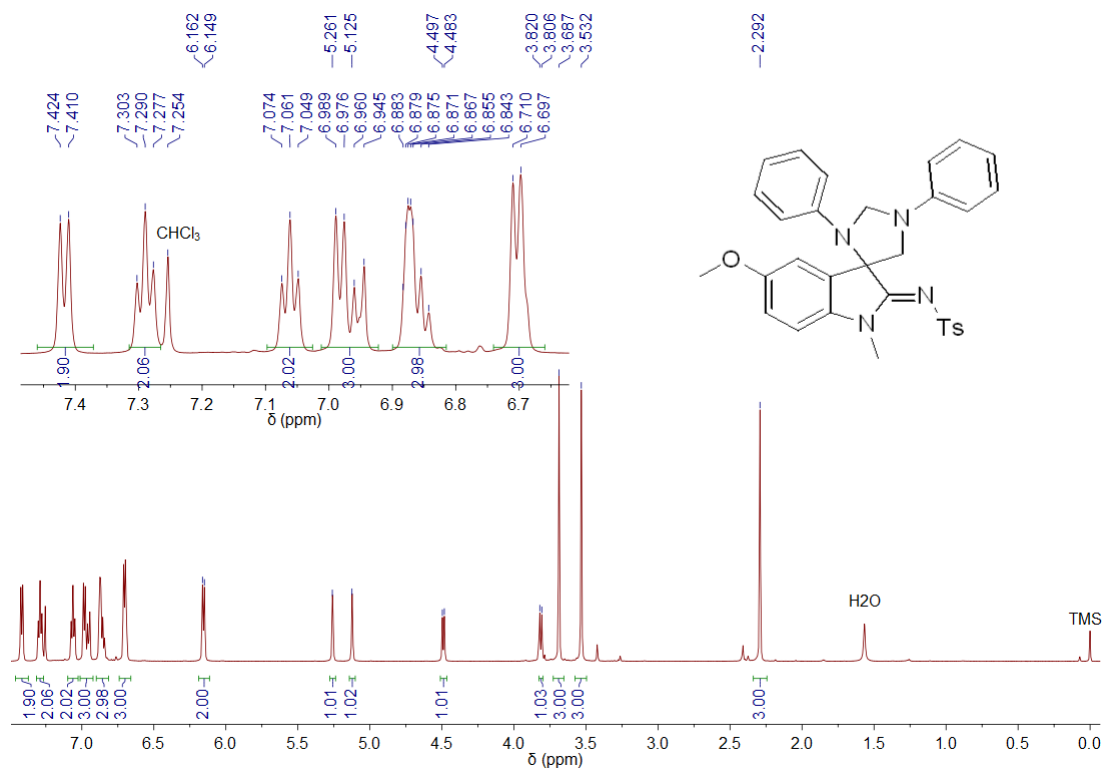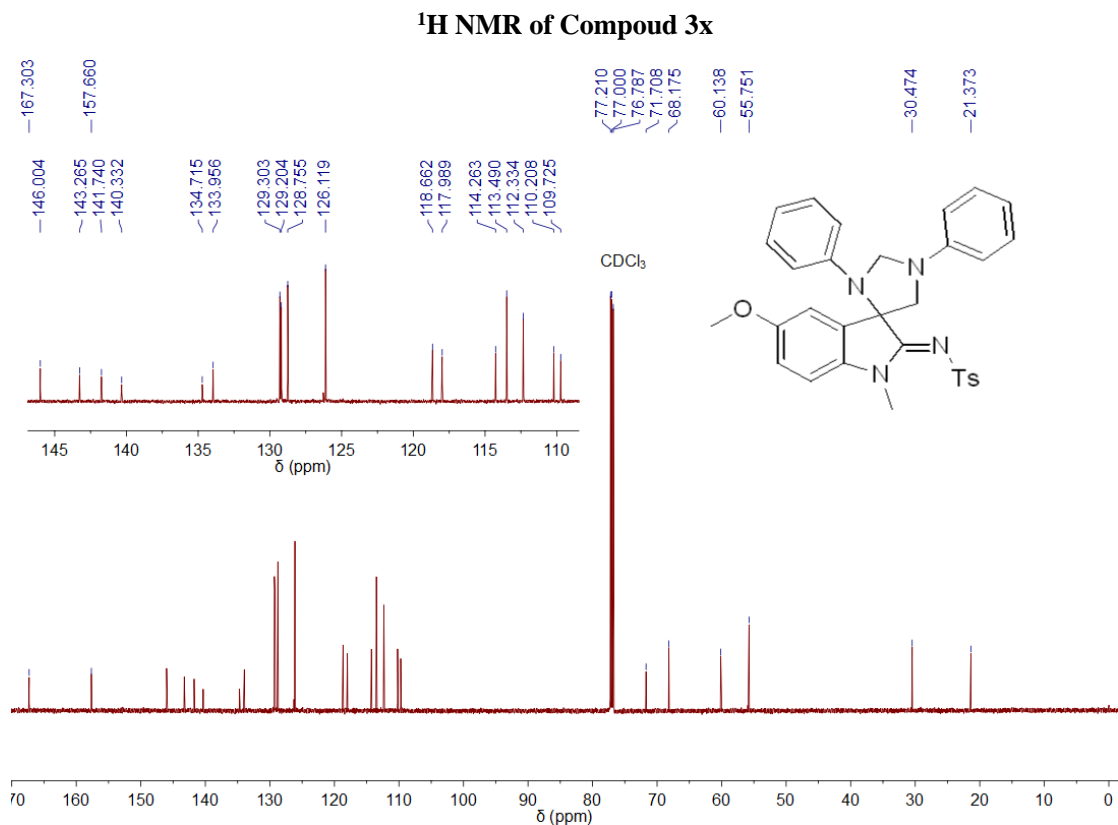

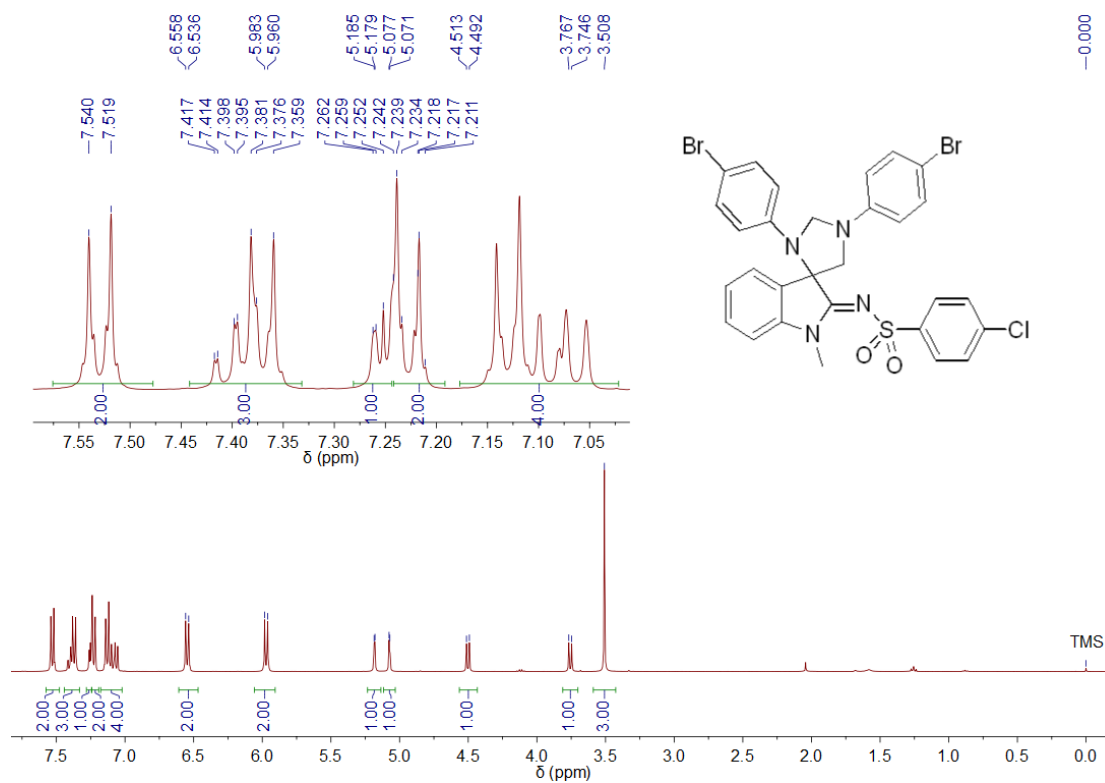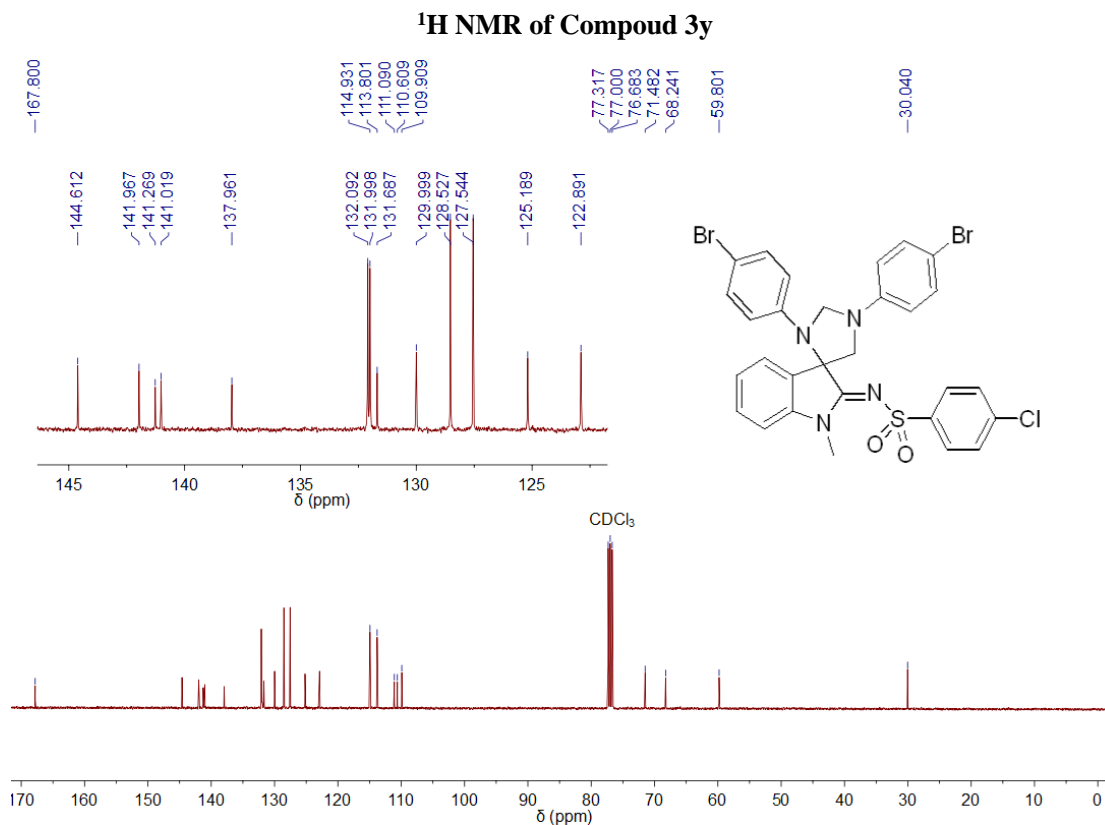

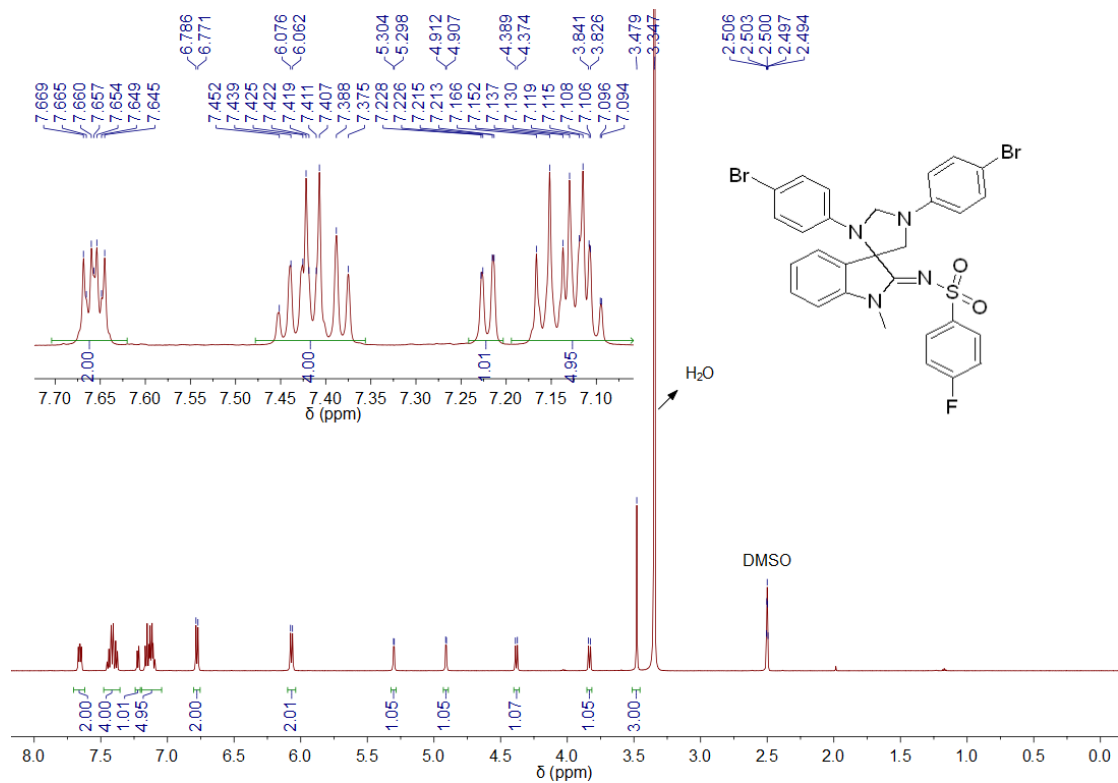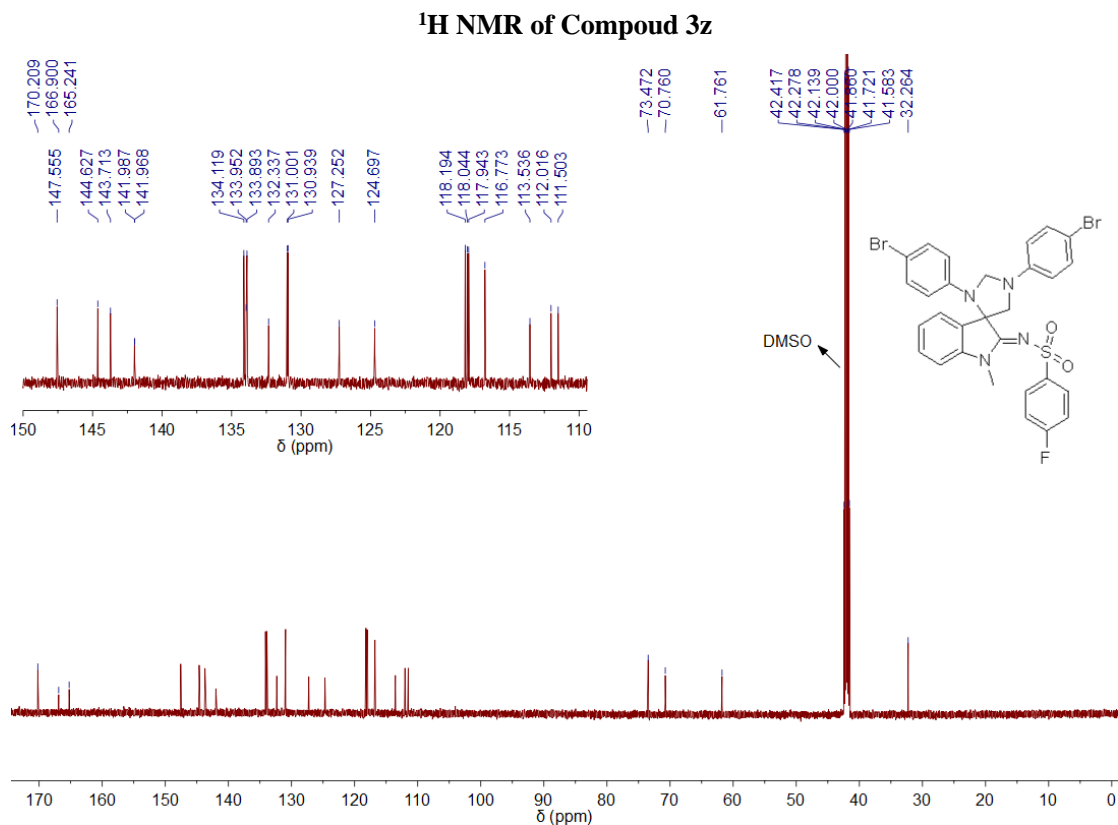

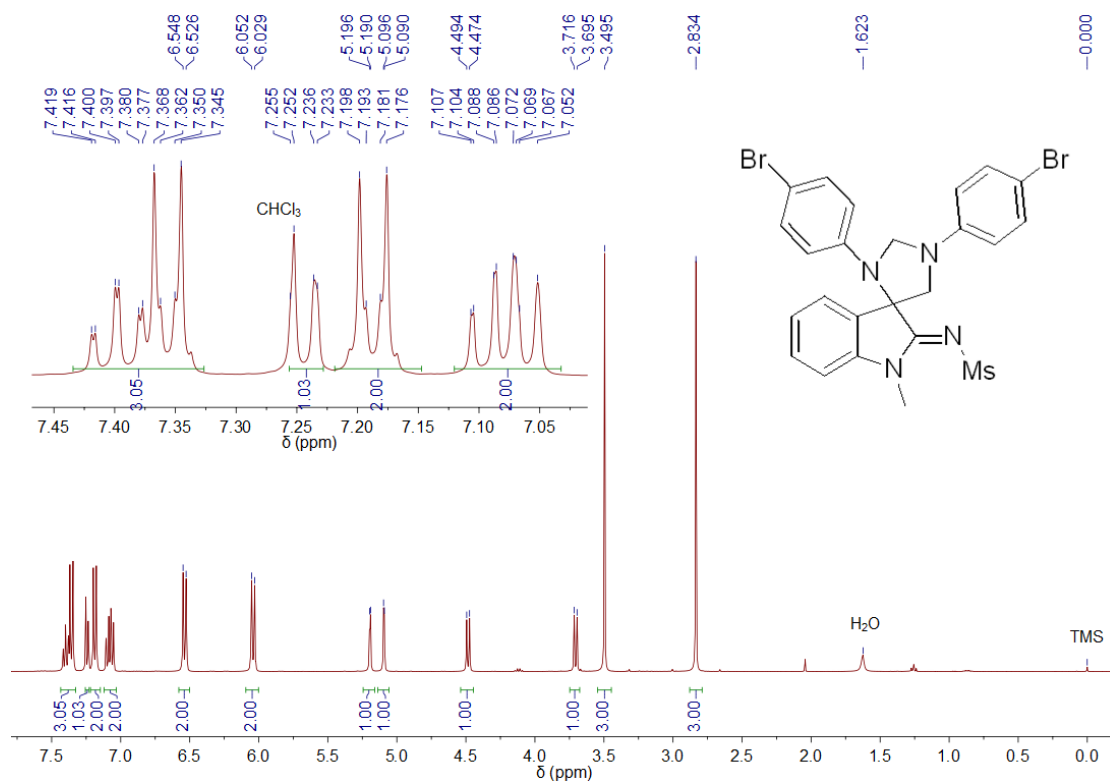

**<sup>1</sup>H NMR of Compound 3A**

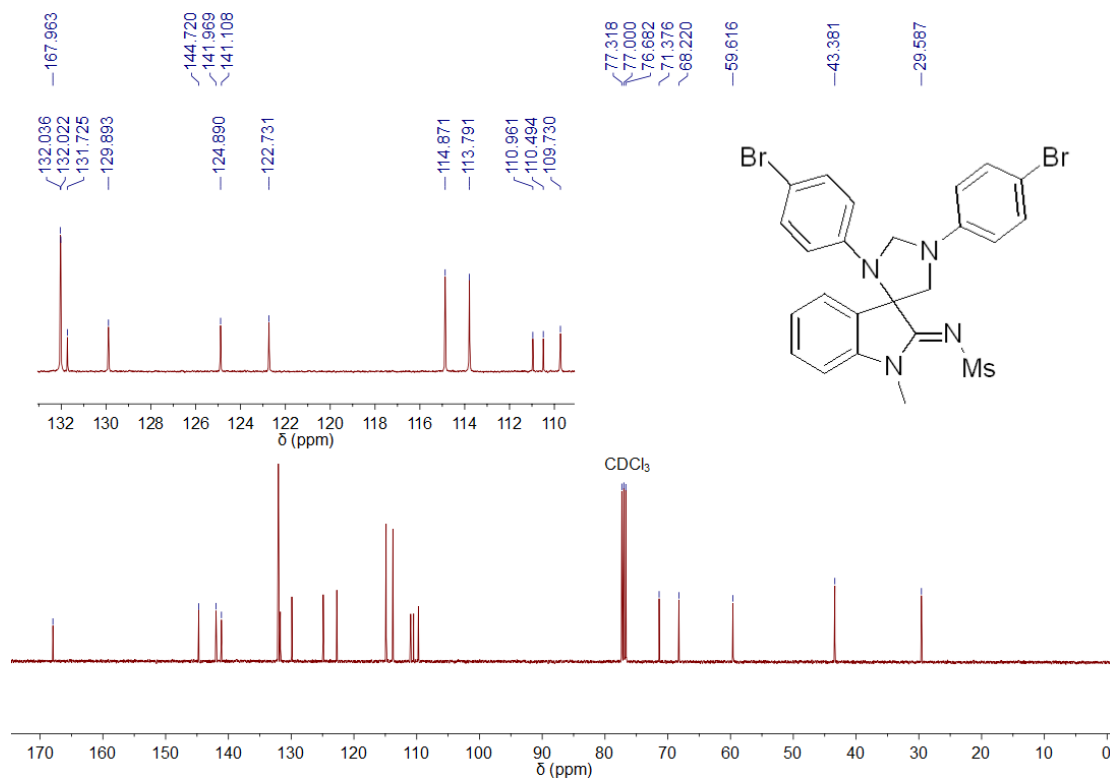

**<sup>13</sup>C NMR of Compound 3A**

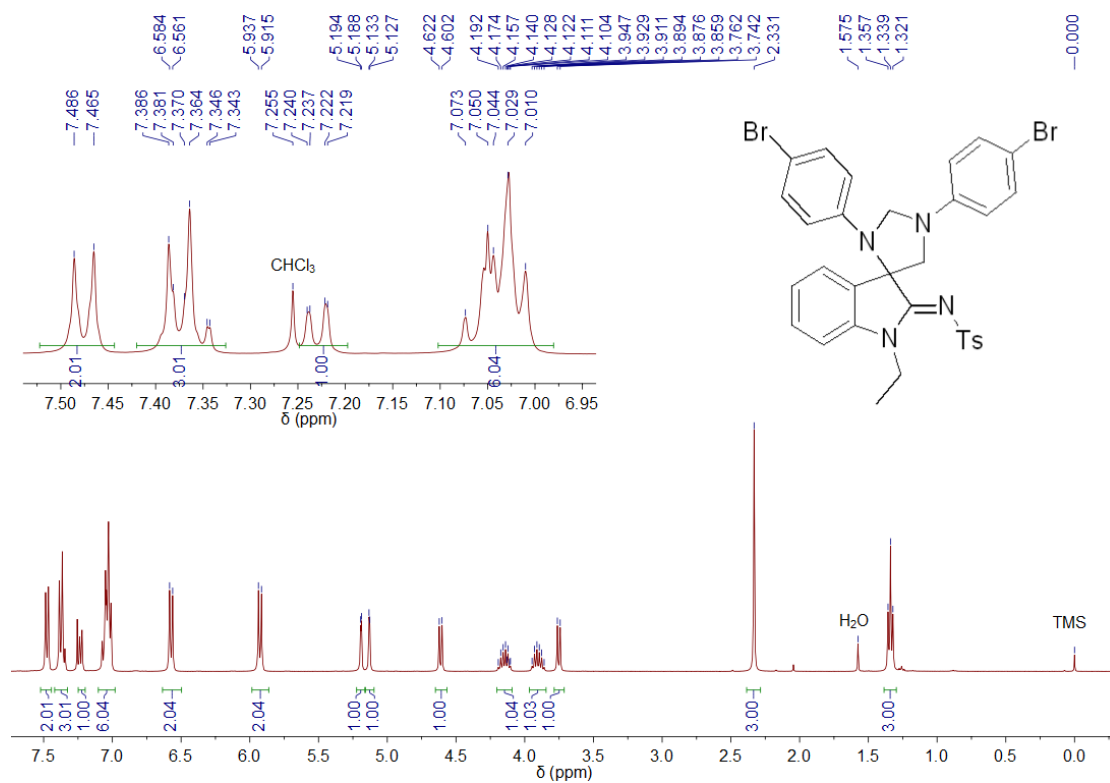

**<sup>1</sup>H NMR of Compound 3B**

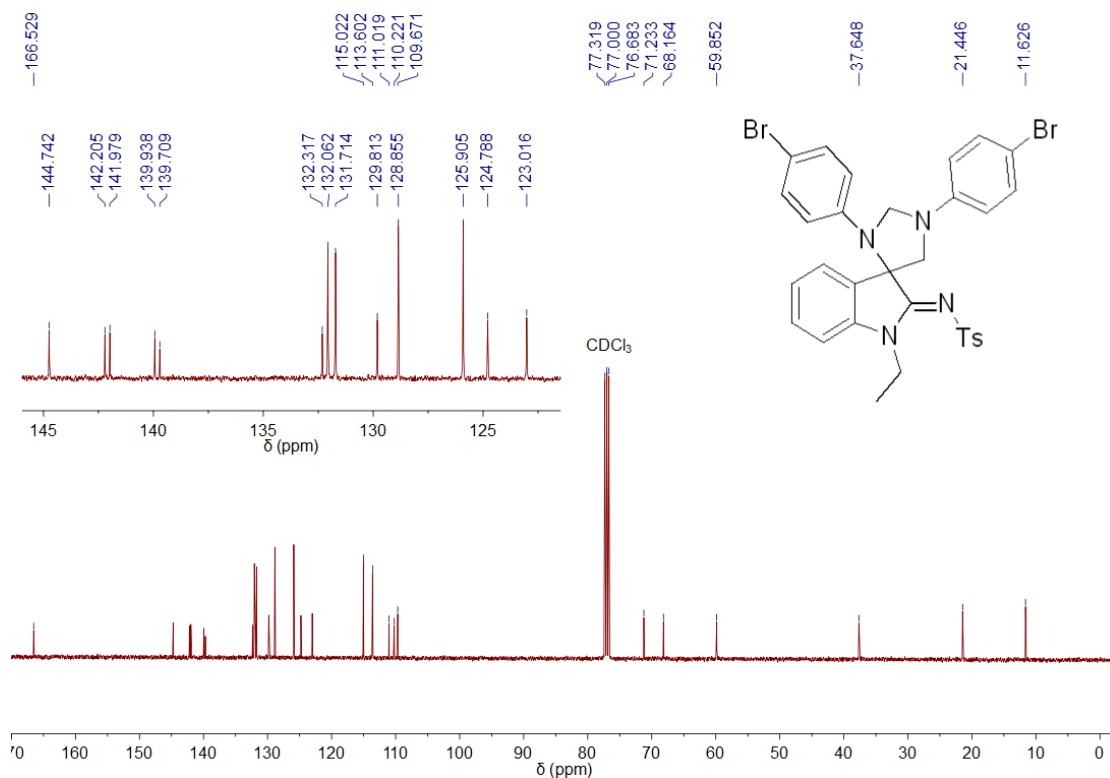

**<sup>13</sup>C NMR of Compound 3B**

## NMR Spectra for Compounds 3C and 3D

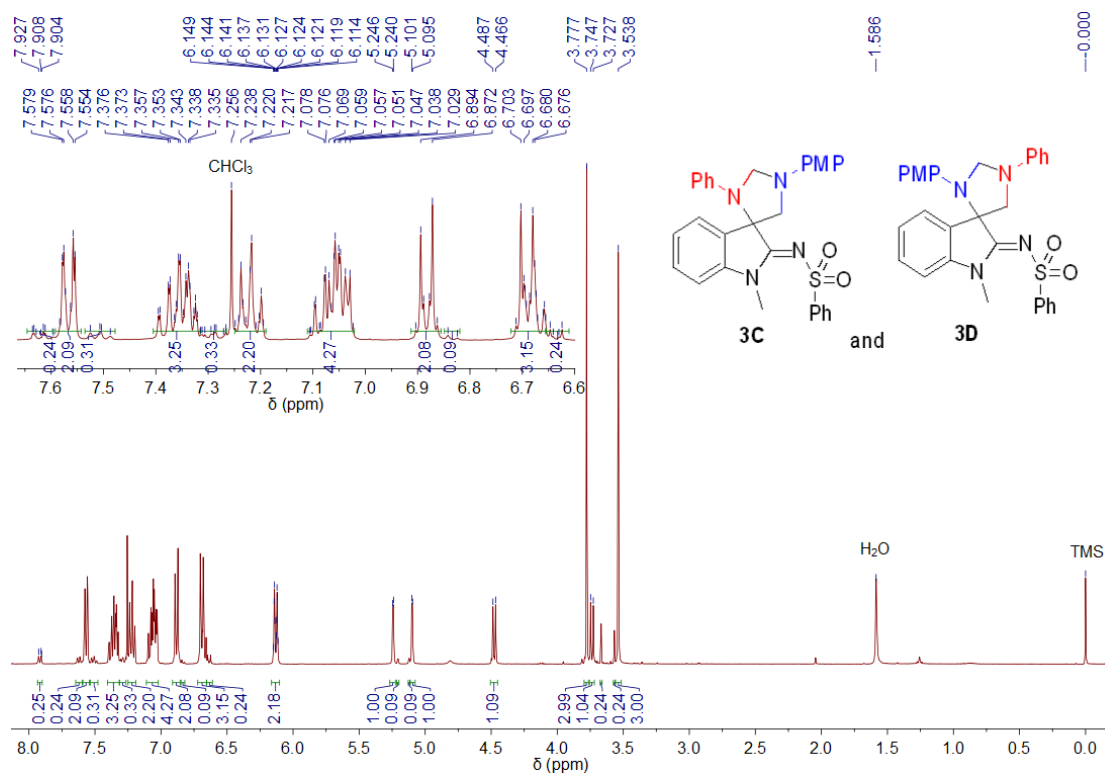

**<sup>1</sup>H NMR of Compounds 3C and 3D**

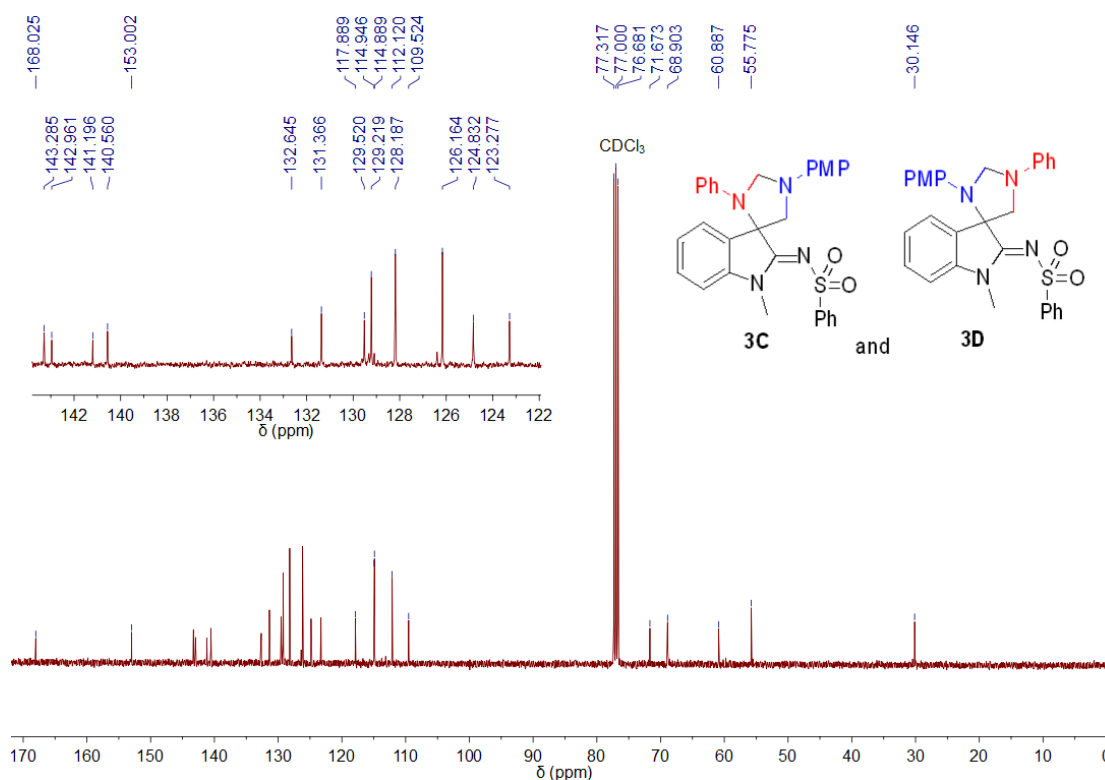

**<sup>13</sup>C NMR of Compounds 3C and 3D**



## HRMS Spectra for Compounds 3C and 3D

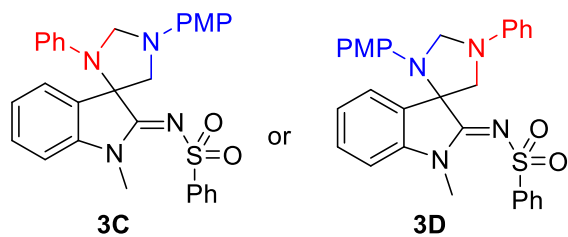

Calculated for  $C_{30}H_{28}N_4NaO_3S^+$  [ $M + Na^+$ ]: 547.1774

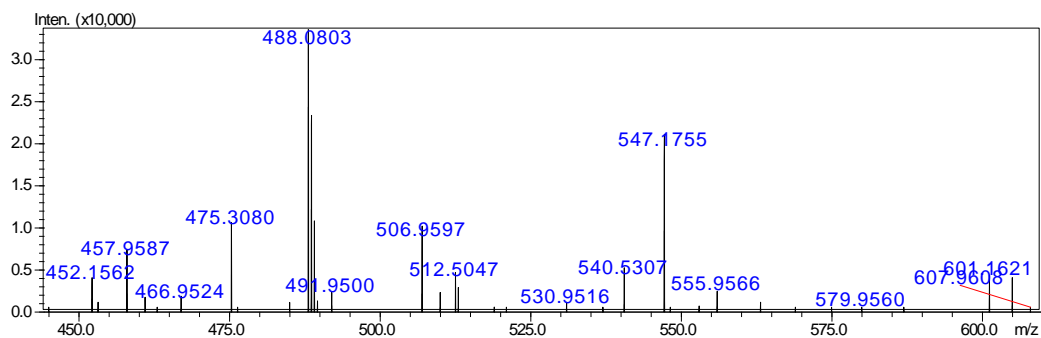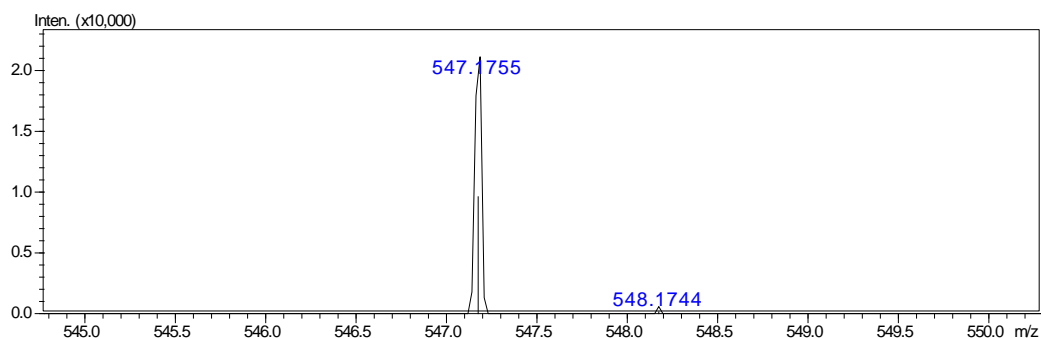

Supplement: c9ob01767d1.pdf [file c9ob01767d1.pdf]
